# Supplementary material for: Reliability and validity of the Chinese version of the Family Resilience Questionnaire (FaRE Questionnaire) in patients with breast cancer: a cross-sectional study
Source: PubMed Central journal article supplement — BMJ Open. 2022 Apr 20;12(4):e051093. doi: 10.1136/bmjopen-2021-051093 (PMC9021805; doi:10.1136/bmjopen-2021-051093), 2022-04-20
Supplement: bmjopen-2021-051093.draft_revisions.pdf [file bmjopen-2021-051093.draft_revisions.pdf]

# BMJ Open

BMJ Open is committed to open peer review. As part of this commitment we make the peer review history of every article we publish publicly available.

When an article is published we post the peer reviewers' comments and the authors' responses online. We also post the versions of the paper that were used during peer review. These are the versions that the peer review comments apply to.

The versions of the paper that follow are the versions that were submitted during the peer review process. They are not the versions of record or the final published versions. They should not be cited or distributed as the published version of this manuscript.

BMJ Open is an open access journal and the full, final, typeset and author-corrected version of record of the manuscript is available on our site with no access controls, subscription charges or pay-per-view fees (<http://bmjopen.bmj.com>).

If you have any questions on BMJ Open's open peer review process please email [info.bmjopen@bmj.com](mailto:info.bmjopen@bmj.com)

# BMJ Open

## Translation and reliability and validity of the Chinese version of the Family Resilience Questionnaire

|                               |                                                                                                                                                                                                                                                                                                                                                                                                                                                                                                                                                                                                                                                                         |
|-------------------------------|-------------------------------------------------------------------------------------------------------------------------------------------------------------------------------------------------------------------------------------------------------------------------------------------------------------------------------------------------------------------------------------------------------------------------------------------------------------------------------------------------------------------------------------------------------------------------------------------------------------------------------------------------------------------------|
| Journal:                      | <i>BMJ Open</i>                                                                                                                                                                                                                                                                                                                                                                                                                                                                                                                                                                                                                                                         |
| Manuscript ID                 | bmjopen-2021-051093                                                                                                                                                                                                                                                                                                                                                                                                                                                                                                                                                                                                                                                     |
| Article Type:                 | Original research                                                                                                                                                                                                                                                                                                                                                                                                                                                                                                                                                                                                                                                       |
| Date Submitted by the Author: | 24-Mar-2021                                                                                                                                                                                                                                                                                                                                                                                                                                                                                                                                                                                                                                                             |
| Complete List of Authors:     | li, mengmeng; Zhengzhou University, School of Nursing and Health<br>YANG, Huashan; Zhengzhou University, School of Nursing and Health<br>jiao, jiawei; Zhengzhou University, School of Nursing and Health<br>LIU, Lamei; Zhengzhou University, School of Nursing and Health<br>WANG, Panpan; Zhengzhou University, School of Nursing and Health<br>Zhang, Zhen-xiang; Zhengzhou University, School of Nursing and Health<br>wang, shiguang; Zhengzhou University of Industrial Technology, College<br>of Medicine<br>Wang, Peng; Zhengzhou University, School of Nursing and Health<br>ZHANG, Shanfeng; Zhengzhou University, Experimental Center for Basic<br>Medicine |
| Keywords:                     | ONCOLOGY, PSYCHIATRY, Health policy < HEALTH SERVICES<br>ADMINISTRATION & MANAGEMENT                                                                                                                                                                                                                                                                                                                                                                                                                                                                                                                                                                                    |
|                               |                                                                                                                                                                                                                                                                                                                                                                                                                                                                                                                                                                                                                                                                         |

SCHOLARONE™  
Manuscripts

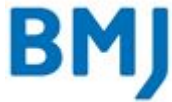

I, the Submitting Author has the right to grant and does grant on behalf of all authors of the Work (as defined in the below author licence), an exclusive licence and/or a non-exclusive licence for contributions from authors who are: i) UK Crown employees; ii) where BMJ has agreed a CC-BY licence shall apply, and/or iii) in accordance with the terms applicable for US Federal Government officers or employees acting as part of their official duties; on a worldwide, perpetual, irrevocable, royalty-free basis to BMJ Publishing Group Ltd ("BMJ") its licensees and where the relevant Journal is co-owned by BMJ to the co-owners of the Journal, to publish the Work in this journal and any other BMJ products and to exploit all rights, as set out in our [licence](#).

The Submitting Author accepts and understands that any supply made under these terms is made by BMJ to the Submitting Author unless you are acting as an employee on behalf of your employer or a postgraduate student of an affiliated institution which is paying any applicable article publishing charge ("APC") for Open Access articles. Where the Submitting Author wishes to make the Work available on an Open Access basis (and intends to pay the relevant APC), the terms of reuse of such Open Access shall be governed by a Creative Commons licence – details of these licences and which [Creative Commons](#) licence will apply to this Work are set out in our licence referred to above.

Other than as permitted in any relevant BMJ Author's Self Archiving Policies, I confirm this Work has not been accepted for publication elsewhere, is not being considered for publication elsewhere and does not duplicate material already published. I confirm all authors consent to publication of this Work and authorise the granting of this licence.

# Translation and reliability and validity of the Chinese version of the Family Resilience Questionnaire

Mengmeng LI<sup>1#</sup>, Huashan YANG<sup>1#</sup>, Jiawei JIAO<sup>1</sup>, Lamei LIU<sup>1</sup>, Panpan WANG<sup>1</sup>, Zhenxiang ZHANG<sup>1</sup>, Shiguang WANG<sup>2</sup>, Peng WANG<sup>1,2\*</sup>, Shanfeng ZHANG<sup>3\*</sup>,

## Abstract

**Objectives:** The objective of this study is to translate, adapt, and evaluate the Chinese version of Family Resilience Questionnaire and to measure the reliability and validity of the Chinese version of family resilience questionnaire among patients with breast cancer in China.

**Design:** It was a cross-sectional study, which involved translation, back-translation, adoption, and psychometric testing of an 24-item Likert-type family resilience measurement.

**Setting:** Three tertiary hospitals in Zhengzhou, China.

**Participants:** The reliability and validity of the Chinese version of FaRE Questionnaire was tested among 249 patients for the first sampling about exploratory factor analysis and 310 patients for the second sampling about Confirmatory factor analysis with breast cancer.

**Primary outcome measures:** Content validity was assessed by six experts. Construct validity test was performed using factor analysis. Cronbach's alpha was used to examine the internal consistency. The test-retest reliability was calculated using the intraclass correlation coefficient on

---

## Correspondence to

Peng WANG, [upliz@zzu.edu.cn](mailto:upliz@zzu.edu.cn)

Shanfeng ZHANG, [zsf@zzu.edu.cn](mailto:zsf@zzu.edu.cn)

1  
2  
3  
4 30 participants.  
5  
6

7 **Results:** For the Chinese version of FaRE questionnaire, the Scale-Content Validity Index  
8  
9 (S-CVI) was 0.97, and the Item-Content Validity Index (I-CVI) ranged from 0.83 to 1.00. The  
10  
11 questionnaire included 24 items, exploratory factor analysis extracted four factors with loading >  
12  
13 0.4, which could explain 72.146% of the total variance; Confirmatory factor analysis showed the  
14  
15 Chinese version of FaRE questionnaire had an excellent four-factor model consistent with the  
16  
17 original questionnaire. The Cronbach's  $\alpha$  coefficient of the total questionnaire was 0.909, and the  
18  
19 Cronbach's  $\alpha$  of four factors ranged from 0.902 to 0.963. The test-retest reliability coefficient of  
20  
21 the total questionnaire was 0.905.  
22  
23  
24  
25  
26  
27

28 **Conclusions:** The Chinese version of FaRE Questionnaire has acceptable reliability and validity  
29  
30 among patients with breast cancer. It can effectively assess the family resilience and provide basis  
31  
32 for personalized family resilience interventions for patients with breast cancer.  
33  
34  
35  
36

### 37 **Strengths and limitations of this study**

38  
39

40 ▶ To our knowledge, this was the first study on the psychometrics of the Chinese translation of  
41  
42 the FaRE Questionnaire.  
43  
44

45 ▶ Strict Chinesization procedures, sufficient sample size, Precise statistics methods.  
46  
47

48 ▶ The findings of our study were only based on data from patients from three first-class hospitals  
49  
50 in Zhengzhou, which may not be representative of patients with breast cancer in mainland China  
51  
52 overall.  
53  
54  
55

56 ▶ the selection of samples' targeted population and quantity may be biased to some extent  
57  
58  
59  
60

1  
2  
3  
4 because of convenience sampling method.  
5  
6

7 ► Future studies should add other related factors to further assess the validity of the Chinese  
8  
9 version of FaRE questionnaire.  
10  
11

## 12 13 **Introduction** 14

15  
16 Breast cancer had the highest incidence in new cancer cases, whose morbidity  
17  
18 and mortality was respectively 24.2%, 15.0% in woman and topped the list  
19  
20 according to the latest global cancer statistics in 2018<sup>[1]</sup>. Among the malignant tumors  
21  
22 in China, breast cancer ranked the fifth, and breast cancer ranked the first among  
23  
24 female malignant tumors. Although the development of medical technology makes  
25  
26 the survival time of breast cancer patients significantly prolonged<sup>[2]</sup>, diagnosis of  
27  
28 breast cancer, mastectomy and long-term postoperative chemoradiotherapy also  
29  
30 inevitably lead to severe adverse stress reactions. Meanwhile, breast cancer is not just  
31  
32 a personal event, it is also a more important family event<sup>[3]</sup>. According to  
33  
34 Bowen family systems theory<sup>[4]</sup>, cancer diagnosis and related clinical treatment of a  
35  
36 family member may cause patients and their families to be in a state of adverse and  
37  
38 high stress, and ultimately affect the stability and balance of the whole family  
39  
40 system<sup>[5]</sup>. Previous studies on family stress of breast cancer patients mostly focused  
41  
42 on negative emotions of breast cancer patients such as anxiety, pessimism, fear<sup>[6-7]</sup> and  
43  
44 depression<sup>[8]</sup> and descending quality of life<sup>[9]</sup>, the psychological distress<sup>[10]</sup>, physical  
45  
46 burden<sup>[11]</sup>, psychosocial burden and economic burden<sup>[12]</sup> of the family members of  
47  
48 breast cancer patients, as well as a variety of adverse family stress reactions including  
49  
50  
51  
52  
53  
54  
55  
56  
57  
58  
59  
60

1  
2  
3  
4 family dysfunction<sup>[13-14]</sup> and reduced family life quality of breast cancer patients<sup>[15]</sup>.  
5  
6

7         With the proposing of family systems theory and the rising of positive  
8  
9  
10         psychology, while discussing the negative impact of cancer on the whole family,  
11  
12         domestic and foreign scholars also found that families of cancer patients have positive  
13  
14         resilience<sup>[16]</sup>. Current researches shows that the focus of research on family stress of  
15  
16         cancer patients has gradually shifted to the strength and power of family, namely,  
17  
18         family resilience, which has been widely used in psychology and nursing<sup>[17,18]</sup>.  
19  
20         Compared with other types of cancer, breast cancer has more significant impacts on  
21  
22         patients, their spouses, family members, conjugal relationships and family function.  
23  
24         Thus, for breast cancer patients, family resilience may provide a new theoretical basis  
25  
26         for the prevention and intervention of family crisis. Therefore it is important to  
27  
28         accurately assess the family resilience of breast cancer. However, domestic research  
29  
30         about family resilience of breast cancer in China is less, and there is still a lack of  
31  
32         effective assessment tools. Family Resilience Questionnaire was compiled based on  
33  
34         Walsh Family Resilience Model by Italian scholar Faccio et al<sup>[19]</sup>, including 24 items  
35  
36         and 4 dimensions involving communication and cohesion, perceived social support,  
37  
38         perceived family coping, religiousness and spirituality. The Family Resilience  
39  
40         Questionnaire is used to measure breast cancer patients' family resilience, more  
41  
42         specifically, the family dynamics and resources, estimating the adaptation flexibility  
43  
44         to cancer disease. The questionnaire has been tested in breast cancer patients in Italy  
45  
46         and has good reliability and validity. The purpose of our study is to provide an  
47  
48         effective tool for assessing the family resilience of Chinese breast cancer patients by  
49  
50  
51  
52  
53  
54  
55  
56  
57  
58  
59  
60

1  
2  
3  
4 translating and cross-cultural adaptation of FaRE questionnaire.  
5  
6

## 7 **Methods**

8  
9

### 10 **Design, participants and setting**

11  
12  
13

14 It was a cross-sectional study. A convenience sample of patients with breast  
15 cancer was recruited from three first-class hospitals in Zhengzhou from December  
16 2019 to February 2020 and From August 2020 to September 2020. Data were  
17 collected in two sampling sessions. The first sampling was used for exploratory factor  
18 analysis, and 249 valid questionnaires were collected The second sampling was used  
19 for confirmatory factor analysis, and 310 cases of valid questionnaires were collected.  
20  
21  
22  
23  
24  
25  
26  
27  
28  
29

30 Criteria for inclusion were as follows: (1) Histopathological examination  
31 confirms breast cancer; (2) aged 18 years or older; (3) able to read and write Chinese;  
32  
33 (4) Informed consent and voluntary participation in the study; Criteria for exclusion  
34 were as follows: (1) sufferers with mental disorders and communication difficulties;  
35  
36 (2) no history of other serious life-threatening diseases.  
37  
38  
39  
40  
41  
42  
43

### 44 **Measurements**

45  
46  
47

48 Demographic characteristics and clinical data were collected using General  
49 Information Questionnaire, Chinese version of the Family Resilience Questionnaire.  
50  
51

52  
53 **General Information Questionnaire.** It's a self design questionnaire, which included  
54 some questions on age, religious faith, marital status, education, occupation,  
55 Household per capita monthly income, Long-term residence, primary caregiver,  
56  
57  
58  
59  
60



1  
2  
3  
4 living situation, payment manner of the medical expenses, treatment of disease,  
5  
6 surgery way, complication, family history of disease.  
7  
8

9  
10 **Chinese version of the Family Resilience Questionnaire.** The questionnaire was  
11  
12 developed by Faccio Italy in 2019 according to the Walsh Family Resilience Model  
13  
14 based on breast cancer and prostate cancer patients<sup>[19]</sup>. It comprises 24 items  
15  
16 measuring four dimensions of communication and cohesion(8 items), perceived social  
17  
18 support(8 items), perceived family coping(4 items), religiousness and spirituality(4  
19  
20 items). The Cronbach'α coefficient of four dimension was 0.88, 0.88, 0.82 and 0.86  
21  
22 respectively in the original questionnaire, and it had good reliability and validity.  
23  
24 Questionnaire respondents indicate to what extent they agree with the items on a  
25  
26 seven-point scale from 'strongly disagree' (scored 1) to 'strongly agree'(scored 7).  
27  
28 Higher scores on the FaRE questionnaire reflect higher family resilience levels.  
29  
30  
31  
32  
33  
34

35  
36 The FaRE questionnaire in the study has been authorized by the original author  
37  
38 Professor Faccio. The questionnaire was translated into Chinese and adapted  
39  
40 cross-culturally using Brislin translation pattern<sup>[20]</sup>. The translation process was as  
41  
42 follows<sup>[21]</sup>: (1) Forward translation: two translator who are respectively a bilingual  
43  
44 graduate student and a bilingual PhD student independently translated the FaRE  
45  
46 questionnaire from English into Chinese; (2) Proofreading: the research group  
47  
48 compared the two Chinese versions and maked modifications and adjustments to form  
49  
50 a harmonized version of the two translated versions; (3) Back translation: two  
51  
52 graduate students majored in English who didn't see the original English version of  
53  
54 the questionnaire independently translated the FaRE questionnaire from Chinese into  
55  
56  
57  
58  
59  
60

1  
2  
3  
4 English. On the premise of being faithful to the original questionnaire, researchers  
5  
6 carried out forward translation and back translation again regarding to the sentences  
7  
8 with a semantic consistency rate of less than 70% until the semantic consistency rate  
9  
10 reaches more than 90%. (4) Cross-cultural adaptation: Expert panel including two  
11  
12 psychologists, two specialists in clinical medicine, two specialists in clinical nursing  
13  
14 independently reviewed the original, proofread and translated version of the  
15  
16 questionnaire to give their opinions on the cultural equivalency and the  
17  
18 appropriateness of the language translation. And they were asked to rate each item on  
19  
20 a four-point Likert type scale ranging from 1 (uncorrelated) to 4 (strongly correlated)  
21  
22 so as to evaluate the content validity of the questionnaire. The researchers will choose  
23  
24 the most appropriate way of Chinese expression according to the suggestions. (5)  
25  
26 Pretest: 30 breast cancer patients were interviewed in depth about their understanding  
27  
28 of the items, and the items with vague semantics and difficult to understand were  
29  
30 timely modified. (6) Combined with the results of expert consultation and pretest,  
31  
32 form a final Chinese version of the Family Resilience Questionnaire.  
33  
34  
35  
36  
37  
38  
39  
40  
41  
42  
43

### 44 **Procedure**

45  
46  
47 The study was approved by the Ethics Committee of Zhengzhou University  
48  
49 (ZZURIB 2020-19) and all patients involved provided informed written consent.  
50  
51  
52 During the survey, the researchers explained the purpose of the study and the filling  
53  
54 method of the questionnaire to the patients in the unified training language. The  
55  
56 General Information Questionnaire and Chinese version of the Family Resilience  
57  
58 Questionnaire were administered to each breast patients. All patients could complete  
59  
60

1  
2  
3  
4 the questionnaire by themselves. Every survey took about 10-20 min to complete.  
5  
6

7 Finally, a subgroup of 30 patients with breast cancer were interviewed again at  
8  
9 the clinic for two week after the initial interview to assess the reproducibility  
10  
11 (test-retest reliability) of the FaRE questionnaire.  
12  
13  
14

## 15 **Data processing and statistical analysis**

16  
17  
18  
19 IBM SPSS software version 21.0 and AMOS software version 21.0 were used  
20  
21 for the statistical analysis. Descriptive statistics were used to summarize the breast  
22  
23 cancer patients' demographic characteristics. Item analysis, validity and reliability of  
24  
25 the questionnaire were assessed.  
26  
27  
28  
29

### 30 **(1) Item analysis**

31  
32  
33  
34 It means to analyze and test the quality of each item, whose purpose is to test the  
35  
36 the suitability or reliability of instruments and individual items. Its results can be used  
37  
38 as the basis for the screening or modification of individual items, so as to enhance the  
39  
40 effectiveness of the questionnaire for the subjects. In this study, the critical value  
41  
42 method and item total score correlation method were used for item analysis. The  
43  
44 items with correlation coefficient less than 0.4 or not reaching the significant level  
45  
46 were deleted<sup>[22]</sup>.  
47  
48  
49  
50  
51

### 52 **(2) Validity**

53  
54  
55  
56 Content validity of the questionnaire was assessed by expert consultation, which was  
57  
58 assessed using the item-level content validity index (I-CVI) and the scale-level  
59  
60

1  
2  
3  
4 content validity index (S-CVI) by calculating the agreement proportion of items from  
5  
6 all the experts.  
7  
8

9  
10 The explanatory factor analysis and confirmatory factor analysis were used to  
11  
12 assess construct validity<sup>[23]</sup>. the Kaise-Meyer-Olkin (KMO) test and Bartlett's  $\chi^2$  test  
13  
14 were first used to examine the suitability of the data for factor analysis. For the  
15  
16 explanatory factor analysis, the load more than 0.4 of the item on a factor was used as  
17  
18 a factor attribution criterion, on the contrary or if there was a double load, the item  
19  
20 would be deleted<sup>[22]</sup>. Confirmatory factor analysis was used to examine Questionnaire  
21  
22 four-factor model. Chi-square degree of freedom ratio, Root Mean Square Residual,  
23  
24 Goodness of fit index, Comparative fit index, Incremental fit index as well as Root  
25  
26 Mean Square Error Approximate were used to evaluate the model<sup>[22]</sup>.  
27  
28  
29  
30  
31  
32

33  
34 All analyses used two-tailed  $p$  values , and  $p < 0.05$  was considered statistically  
35  
36 significant.  
37  
38

### 39 40 **(3) Reliability**

41  
42  
43 Internal consistency referred to the items' homogeneity and internal correlation  
44  
45 between instruments, which was assessed using the Cronbach's  $\alpha$  coefficient. Scores  
46  
47 greater than or equal to 0.7 were considered acceptable<sup>[24]</sup>. More scores indicated  
48  
49 more excellent internal consistency.  
50  
51

52  
53  
54 Test-retest reliability was used to reflect the temporal stability of the  
55  
56 questionnaire by calculating the pearson correlation coefficient of the total score and  
57  
58 each factor. Scores of 0.70-0.89 were considered strong and those higher than 0.90  
59  
60

1  
2  
3  
4 were considered very strong.  
5  
6

## 7 **Results**

### 10 **Demographic and clinical characteristics**

11  
12  
13  
14 All the breast cancer patients were female. The patients' age of the first sampling  
15 was 20~78 (45.77±10.09) years old, and the second sampling was 22~73  
16 (45.7±10.213) years old. Demographic and clinical characteristics of the sample were  
17  
18  
19  
20  
21  
22 shown in Table 1.  
23

### 25 **Cross-cultural adaption**

26  
27  
28 During the expert consultation process, a psychologist believed the Chinese  
29 expression of item 3 'We can deal this illness as a family' was hard to understand. He  
30 suggested to change it by a substitute word and adjusting the word order. Another  
31  
32  
33  
34  
35  
36  
37  
38  
39  
40  
41  
42  
43  
44  
45  
46  
47  
48  
49  
50  
51  
52  
53  
54  
55  
56  
57  
58  
59  
60  
During the pretesting, almost all patients thought the Chinese expressions of item  
background.

During the pretesting, almost all patients thought the Chinese expressions of item

1 'We understand each other with regard to the experience of illness we are living'  
was inappropriate and hard to understand. To clarify the meaning of this item for the  
participants, after communicating with the original author, we did some amendment.

### Item analysis

**correlation analysis.** The correlation analysis showed that the correlation coefficient between the score of each item and the total score of the questionnaire was 0.437~0.712 ( $P<0.01$ ), both greater than 0.4. Thus, all items were reserved.

**Extreme Value Method.** CR value was used as the test index to analyze the distinction between entries in the Chinese version of the family resilience questionnaire. It showed that the differences among all items were statistically significant ( $P<0.01$ ).

### Validity

**Content validity.** For the expert panel, the scale-level content validity index (S-CVI) was 0.97, and item-level content validity index (I-CVI) ranged from 0.83 to 1.00.

**Construct validity.** For exploratory factor analysis, the KMO value was 0.907, indicating that the data were suitable for factor analysis, and Bartlett's test of sphericity was 5006.376 ( $P<0.001$ ), suggesting that extraction of common factors could explain most of the statistical information which questionnaire entries represented<sup>[22]</sup>. Four common factors with eigenvalue  $> 1$  were extracted by principal component analysis, which could explain 72.146% of the total variance. The load of

1  
2  
3  
4 each item on its dimension in the component matrix was  $> 0.40$  (minimum  
5  
6 value:0.476; maximum value:0.968) by maximum variance orthogonal rotation. The  
7  
8 final four common factors extracted in this study were consistent with the original  
9  
10 questionnaire. Factor 1 was named Communication and cohesion, Factor 2 was  
11  
12 named Perceived social support, Factor 3 was named Perceived family coping and  
13  
14 factor 4 was named Religiousness and Spirituality. See the component matrix of each  
15  
16 factor in Table 2.  
17  
18  
19  
20  
21  
22

23 To further verify the structural validity of the questionnaire, 310 samples were  
24  
25 subjected to confirmatory factor analysis using AMOS 21.0 software. According to  
26  
27 the structure and dimension of the original questionnaire, Communication and  
28  
29 cohesion, Perceived social support, Perceived family coping and Religiousness and  
30  
31 Spirituality were set as four latent variables. And the factor structure including 24  
32  
33 items was set as observation variable to establish a preset model of confirmatory  
34  
35 factor analysis.  
36  
37  
38  
39  
40  
41

42 Normality test for the collected data showed that each item's skewness index  
43  
44 was far  $< 3$ , kurtosis index of was far  $< 8$ . The data were in accordance with normal  
45  
46 distribution. Therefore, maximum likelihood method was adopted to estimate the  
47  
48 parameter model. The initial model fitting results were shown in Figure 1.  
49  
50  
51  
52

53 The fitting indexes of initial model were not ideal, which indicated the deviation  
54  
55 between the default model and the actual observation data. It needed to be revised.  
56  
57  
58

59 The model was revised on the basis of the original hypothesis model.  
60

1  
2  
3  
4 Modification index of the model was defined as 4. If modification index was greater  
5  
6 than 4, it meant that the model needed to be modified. Fitting indexes both were  
7  
8 greater than 0.9 after the modification of default model, which reached an acceptable  
9  
10 range (Figure2). See Table 3 for the fitting indexes before and after the modification.  
11  
12  
13

## 14 15 **Reliability**

16  
17  
18 **Internal consistency.** The Cronbach's  $\alpha$  coefficients for the total Chinese version of  
19  
20 Family Resilience Questionnaire was 0.909. Cronbach's  $\alpha$  coefficients of four factors  
21  
22 respectively were 0.902, 0.932, 0.905, 0.963.  
23  
24

25  
26  
27 **Test-retest reliability.** The test-retest reliability for the total Chinese version of  
28  
29 Family Resilience Questionnaire was 0.905, which respectively were 0.952, 0.949,  
30  
31 0.968, 0.942.  
32  
33

## 34 35 **Discussion**

36  
37  
38 The FaRE Questionnaire is an instrument designed to measure family resilience  
39  
40 among patients with cancer<sup>19</sup>. The study was conducted to determine whether the  
41  
42 FaRE Questionnaire could be used among Chinese patients with breast cancer in  
43  
44 mainland China. Through literature review, Chinese research status of family  
45  
46 resilience was not profound enough, specially for patients with breast cancer.  
47  
48 Accurately assessing the family resilience of breast cancer patients is the basis. A  
49  
50 recent review showed that instruments for family resilience in patients with breast  
51  
52 cancer lacked localization<sup>[26]</sup>. Thus we translated the FaRE Questionnaire into Chinese  
53  
54 using forward and back-translation, expert review, cultural adaption and pilot testing  
55  
56  
57  
58  
59  
60



1  
2  
3  
4 seriously to make sure the semantic equivalence and intelligibility of the Chinese  
5  
6 version of the questionnaire. We also examined the reliability and validity of the  
7  
8 Chinese version of FaRE Questionnaire using item analysis, reliability, content  
9  
10 validity, exploratory factor analysis, confirmatory factor analysis.  
11  
12  
13  
14

15 Previously, the original Italy version of the questionnaire was proved to be  
16  
17 reliable and valid among a total of 213 patients with a histologically confirmed  
18  
19 non-metastatic breast or prostate cancer. Nevertheless, patients' lifestyles and cultural  
20  
21 backgrounds in China are different from Italy. Our study suggested that the FaRE  
22  
23 Questionnaire can be adapted to Chinese cultures, which had excellent content  
24  
25 validity and construct validity as well as high internal consistency reliability and  
26  
27 test-retest reliability among patients with breast cancer.  
28  
29  
30  
31  
32  
33

34 Item analysis showed that correlation coefficients between the score of each  
35  
36 item and the total score of the questionnaire were both greater than 0.4 and CR value  
37  
38 also were statistically significant, indicating suitability or reliability of items.  
39  
40  
41  
42

43 Results of our study shown that the FaRE Questionnaire had a good content  
44  
45 validity, indicating that the questionnaire can accurately reflect the family resilience  
46  
47 of patients with breast cancer. Exploratory factor analysis and confirmatory factor  
48  
49 analysis were conducted on the large-scale samples to examine the construct validity.  
50  
51 For exploratory factor analysis, the analyses results indicated that all the items had  
52  
53 factor loading  $>0.476$ , meeting the criterion for significance. For confirmatory factor  
54  
55 analysis, the results indicated a four-factor structure consistent with the original Italy  
56  
57  
58  
59  
60

1  
2  
3  
4 version. These indicated that the validity of the Chinese version of the FaRE  
5  
6  
7  
8  
9  
10  
11  
12  
13  
14  
15  
16  
17  
18  
19  
20  
21  
22  
23  
24  
25  
26  
27  
28  
29  
30  
31  
32  
33  
34  
35  
36  
37  
38  
39  
40  
41  
42  
43  
44  
45  
46  
47  
48  
49  
50  
51  
52  
53  
54  
55  
56  
57  
58  
59  
60

version. These indicated that the validity of the Chinese version of the FaRE Questionnaire was relatively stable and was consistent with the tabulation theory.

Cronbach's  $\alpha$  coefficient for the total FaRE Questionnaire was 0.909 for the including sample, and Cronbach's  $\alpha$  coefficients of four factors were respectively 0.90, 0.932, 0.905, 0.963, indicating high internal consistency reliability of the Chinese version of FaRE Questionnaire. This finding was higher than Cronbach's  $\alpha$  for the Italy population<sup>[18]</sup>. The Chinese version of FaRE Questionnaire also had a high test–retest reliability, indicating good time stability in breast cancer patients.

As a global public health problem threatening women' health, breast cancer has more significant impacts on patients, their spouses, family members, conjugal relationships and family function. Family resilience emphasizes how the family as a system can cope with stress and adversity to help the family achieve good adjustment and adaptation. It is imperative to pay attention to the family resilience of breast cancer patients. The Chinese version of FaRE questionnaire finally formed in this study has been subjected to strict reliability and validity test. The preliminary results also show that the questionnaire can scientifically and effectively evaluate the family resilience of breast cancer patients in mainland China. The Chinese version of FaRE questionnaire has satisfactory validity and reliability for use among patients with breast cancer in mainland China. Further research can use the instrument to assess the family resilience of breast cancer patients, and on this basis provide personalized and scientific family resilience intervention.

## Conclusions

The results of this study suggest that the Chinese version of FaRE Questionnaire is a valid and reliable instrument. It can effectively assess the family resilience and provide basis for personalized family resilience interventions for patients with breast cancer.

## Author affiliations

<sup>1</sup>Community Nursing Department, School of Nursing and Health, Zhengzhou University, China

<sup>2</sup> College of Medicine, Zhengzhou University of Industrial Technology, Zhengzhou, China

<sup>3</sup> Experimental Center for Basic Medicine, Zhengzhou University, Zhengzhou, Henan, China.

## Contributors

Mengmeng LI and Huashan YANG contributes equally to this work—conceptualisation, methodology, software, reliability, validation, formal analysis, investigation, data curation, writing (original draft), writing (review and editing). Peng WANG—conceptualisation, methodology, writing (review and editing). Jiawei JIAO, Lamei LIU, Panpan WANG—conceptualisation, investigation, resources. Zhenxiang ZHANG, Shiguang WANG—conceptualisation, supervision, project administration and funding acquisition and writing (review and editing).

## Funding

This study was supported by Innovative Talent Project of Henan Educationl committee grant number 20HASTIT047, Basic Research Fund for Young teachers of Zhengzhou University grant

1  
2  
3  
4 number JC2020202016, Medical Social Sciences Federation of Henan grant number  
5  
6 SKL-2020-621, Medical Education Research Project of Henan grant number Wjlx2020362,  
7  
8  
9 Project of Henan Science and Technology Department grant number 202102310069, and Project  
10  
11 of Henan Health Department grant number SBGJ202002103.  
12

13  
14  
15 **Competing interests** None declared.  
16

17  
18 **Patient and public involvement** Patients and/or the public were not involved in the design, or  
19  
20  
21 conduct, or reporting, or dissemination plans of this research.  
22

23  
24  
25 **Patient consent for publication** Not required.  
26

#### 27 28 **Ethics approval**

29  
30  
31 The Ethics Committee of Zhengzhou University has approved the study(ZZURIB 2020-19).  
32

33  
34  
35 **Provenance and peer review** Not commissioned; externally peer reviewed.  
36

37  
38 **Data availability statement** Data are available upon reasonable request. Deidentified participant  
39  
40  
41 data are available upon reasonable request. Contact:17839945811@163.com.  
42

#### 43 44 **Declaration of conflicting interests**

45  
46  
47 We have read and understood BMJ policy on declaration of interests and declare that we have no  
48  
49  
50 competing interests.  
51

## 52 53 **REFERENCES**

- 54  
55  
56  
57 1 Bray F, Ferlay J, Soerjomataram I, et al . Global cancer statistics 2018: GLOBOCAN  
58  
59 estimates of incidence and mortality worldwide for 36 cancers in 185 countries. CA: a cancer  
60

- 1  
2  
3  
4 journal for clinicians 2018; 68:394-24.  
5  
6  
7 2 Cardoso F, Kyriakides S, Ohno S, et al. Early breast cancer: ESMO Clinical Practice  
8  
9 Guidelines for diagnosis, treatment and follow-up. *Annals of Oncology* 2018; 30:1194-20.  
10  
11  
12  
13 3 Alexander A, Kaluve R, Prabhu JS, et al. The Impact of Breast Cancer on the Patient and the  
14  
15 Family in Indian Perspective. *Indian Journal of Palliative Care* 2019; 25:66–2.  
16  
17  
18  
19 4 Haefner, J. An application of Bowen family systems theory. *Issues in Mental Health Nursing*  
20  
21 2014;35:835-41.  
22  
23  
24  
25 5 Rolland JS. Cancer and the family: An integrative model. *Cancer* 2005;104:2584-95.  
26  
27  
28  
29 6 Matzka M, Mayer H, Köck-Hódi S, et al. Relationship between Resilience, Psychological  
30  
31 Distress and Physical Activity in Cancer Patients: A Cross - Sectional Observation Study.  
32  
33 *PloS One* 2016;11:e0154496.  
34  
35  
36  
37 7 Milanti A, Metsala Eija, Hannula L. Reducing psychological distress in patients undergoing  
38  
39 chemotherapy. *British Journal of Nursing (Mark Allen Publishing)* 2016; 25:S25-30.  
40  
41  
42  
43 8 Tsang W, Chow LWC, Loo WTY, et al. Tai Chi Chuan enhances cytokine expression levels  
44  
45 and psychological factors in post-chemotherapy breast cancer patients. *European Journal of*  
46  
47 *Cancer & Clinical Oncology* 2015;51:e30.  
48  
49  
50  
51  
52 9 An Y, Fu G, Yuan, G. Quality of Life in Patients With Breast Cancer: The Influence of Family  
53  
54 Caregiver's Burden and the Mediation of Patient's Anxiety and Depression. *The Journal of*  
55  
56 *Nervous and Mental Disease* 2019;207:921–26.  
57  
58  
59  
60

- 1  
2  
3  
4 10 Fang CY, Manne, SL, Pape SJ. Functional impairment, marital quality, and patient  
5  
6 psychological distress as predictors of psychological distress among cancer patients' spouses.  
7  
8 Health Psychology 2001;20:452-57.  
9  
10  
11  
12 11 Stenberg U, Ruland CM, Miaskowski C. Review of the literature on the effects of caring for  
13  
14 a patient with cancer. Psycho-Oncology 2010;19:1013–25.  
15  
16  
17  
18 12 Agbeko AE, Arthur J, Bayuo J, et al. Seeking healthcare at their 'right' time; the iterative  
19  
20 decision process for women with breast cancer. BMC Cancer 2020;20:1011.  
21  
22  
23  
24 13 Zhang L, Yu R, Zheng QH, et al. Study on relationship model between stigma, family  
25  
26 function of breast cancer patients. Nursing Research 2017;31:1333-36.  
27  
28  
29  
30 14 Chen CM, Yang YU, Wang YJ, et al. Features and Effects of Family Function in  
31  
32 Postoperative Breast Cancer Patients under Chemotherapy in a Hospital, Zhejiang. Medicine  
33  
34 and Society 2014; 27:81-3.  
35  
36  
37  
38 15 Ginter AC, Radina ME. "I Was There With Her": Experiences of Mothers of Women With  
39  
40 Breast Cancer. Journal of Family Nursing 2019;25:54–80.  
41  
42  
43  
44 16 Wang WH, Jiang Z, Yang Z. Family Resilience: Concept and Application in Families with a  
45  
46 Cancer Patient(review). Chinese Journal of Rehabilitation Theory and Practice 2015;21:  
47  
48 534-38.  
49  
50  
51  
52  
53 17 Inhestern L, Bergelt C. When a mother has cancer: strains and resources of affected families  
54  
55 from the mother's and father's perspective-a qualitative study. BMC Women's Health  
56  
57 2018;18:72.  
58  
59  
60

- 1  
2  
3  
4 18 Selman LE, Beynon T, Radcliffe E, et al. 'We're all carrying a burden that we're not sharing':  
5  
6 a qualitative study of the impact of cutaneous T-cell lymphoma on the family. *British Journal*  
7  
8  
9 of *Dermatology* 2015;172:1581-92.  
10  
11  
12 19 Faccio F, Gandini S, Renzi C, et al. Development and validation of the Family Resilience  
13  
14 (FaRE) Questionnaire: an observational study in Italy. *BMJ Open* 2019;9:e024670.  
15  
16  
17  
18 20 Brislin RW. Back-translation for cross-cultural research. *Journal of Cross-Cultural*  
19  
20  
21 *Psychology* 1970;1:185-16.  
22  
23  
24 21 McKown S, Acquadro C, Anfray C, et al. Good practices for the translation, cultural  
25  
26  
27 adaptation, and linguistic validation of clinician-reported outcome, observer-reported  
28  
29  
30 outcome, and performance outcome measures. *Journal of Patient-Reported Outcomes*  
31  
32  
33 2020;4:89.  
34  
35  
36 22 Wu ML. Questionnaire statistical analysis practice. Operation and Application of SPSS.  
37  
38  
39 Chongqing: Chongqing University Press, 2010.  
40  
41  
42 23 Martin JS, Vincenzi C, Spirig R. Principles and methods of good practice for the translation  
43  
44  
45 process for instruments of nursing research and nursing practice. *Pflege* 2007;20:157-63.  
46  
47  
48 24 Polit DF, Beck CT. The content validity index: are you sure you know what's being  
49  
50  
51 reported? Critique and recommendations. *Research in Nursing & Health* 2006;29:489-97.  
52  
53  
54 25 Koo TK, Li MY. A guideline of selecting and reporting intraclass correlation coefficients  
55  
56  
57 for reliability research. *Journal of Chiropractic Medicine* 2016; 15:155-63.  
58  
59  
60 26 Wang ZX, Liu JE, Chen SQ. The research progress of family adjustment and adaptation for

1  
2  
3  
4 breast cancer patients. Chinese Nursing Management 2016;16:195-98.  
5  
6  
7  
8  
9  
10  
11  
12  
13  
14  
15  
16  
17  
18  
19  
20  
21  
22  
23  
24  
25  
26  
27  
28  
29  
30  
31  
32  
33  
34  
35  
36  
37  
38  
39  
40  
41  
42  
43  
44  
45  
46  
47  
48  
49  
50  
51  
52  
53  
54  
55  
56  
57  
58  
59  
60

For peer review only



1  
2  
3  
4  
5  
6  
7  
8  
9  
10  
11  
12  
13  
14  
15  
16  
17  
18  
19  
20  
21  
22  
23  
24  
25  
26  
27  
28  
29  
30  
31  
32  
33  
34  
35  
36  
37  
38  
39  
40  
41  
42  
43  
44  
45  
46  
47  
48  
49  
50  
51  
52  
53  
54  
55  
56  
57  
58  
59  
60

For peer review only

1  
2  
3  
4  
5  
6  
7  
8  
9  
10  
11  
12  
13  
14  
15  
16  
17  
18  
19  
20  
21  
22  
23  
24  
25  
26  
27  
28  
29  
30  
31  
32  
33  
34  
35  
36  
37  
38  
39  
40  
41  
42  
43  
44  
45  
46  
47  
48  
49  
50  
51  
52  
53  
54  
55  
56  
57  
58  
59  
60

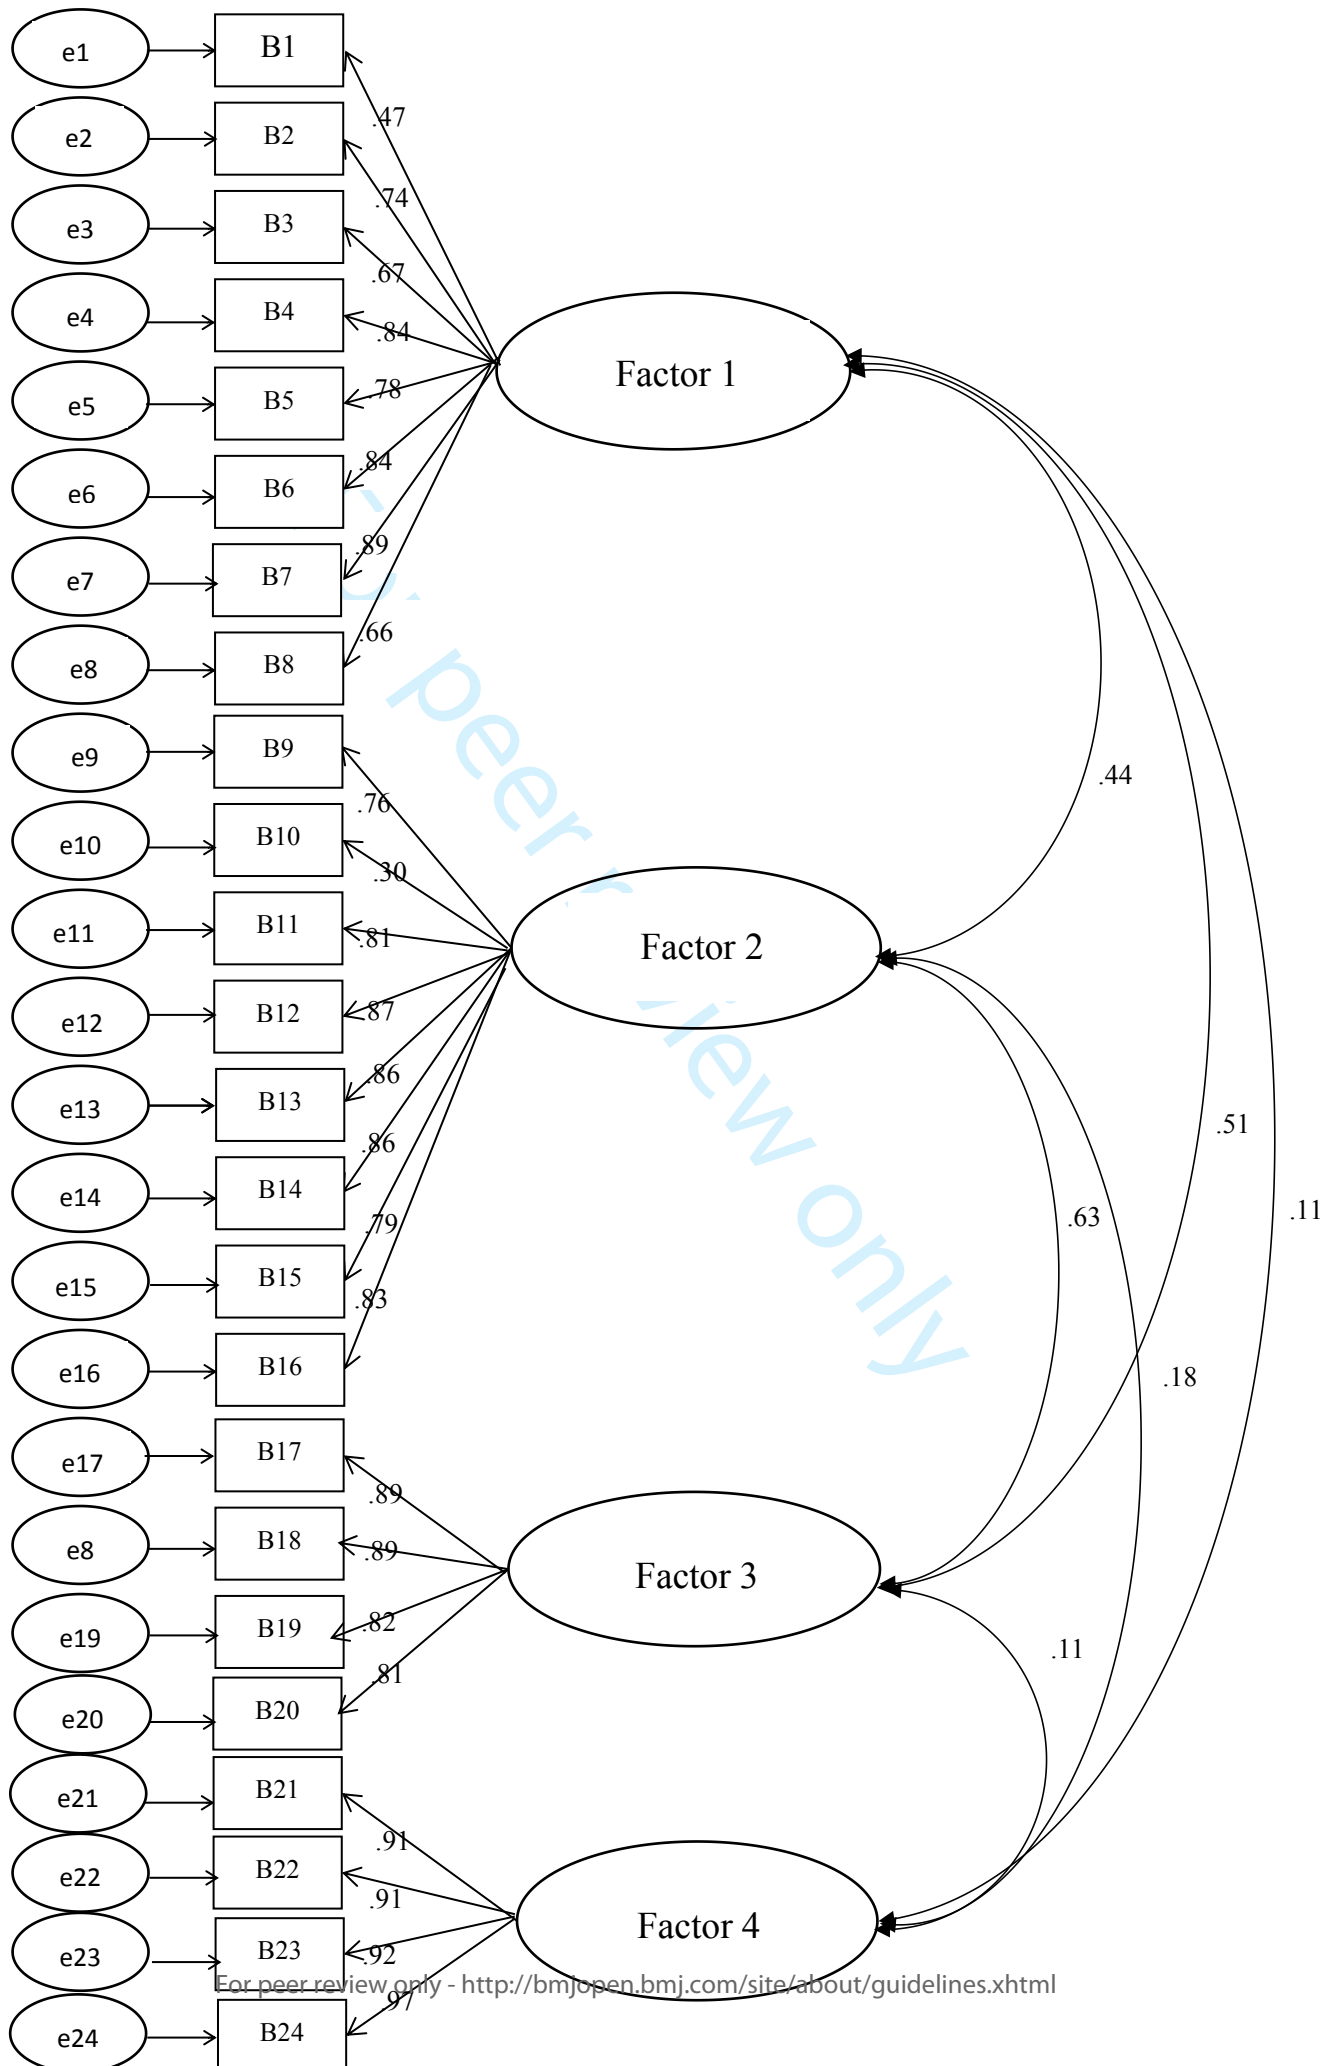

1  
2  
3  
4  
5  
6  
7  
8  
9  
10  
11  
12  
13  
14  
15  
16  
17  
18  
19  
20  
21  
22  
23  
24  
25  
26  
27  
28  
29  
30  
31  
32  
33  
34  
35  
36  
37  
38  
39  
40  
41  
42  
43  
44  
45  
46  
47  
48  
49  
50  
51  
52  
53  
54  
55  
56  
57  
58  
59  
60

**Figure 1 Fitting figure of default model of Chinese version of FaRE Questionnaire**

For peer review only

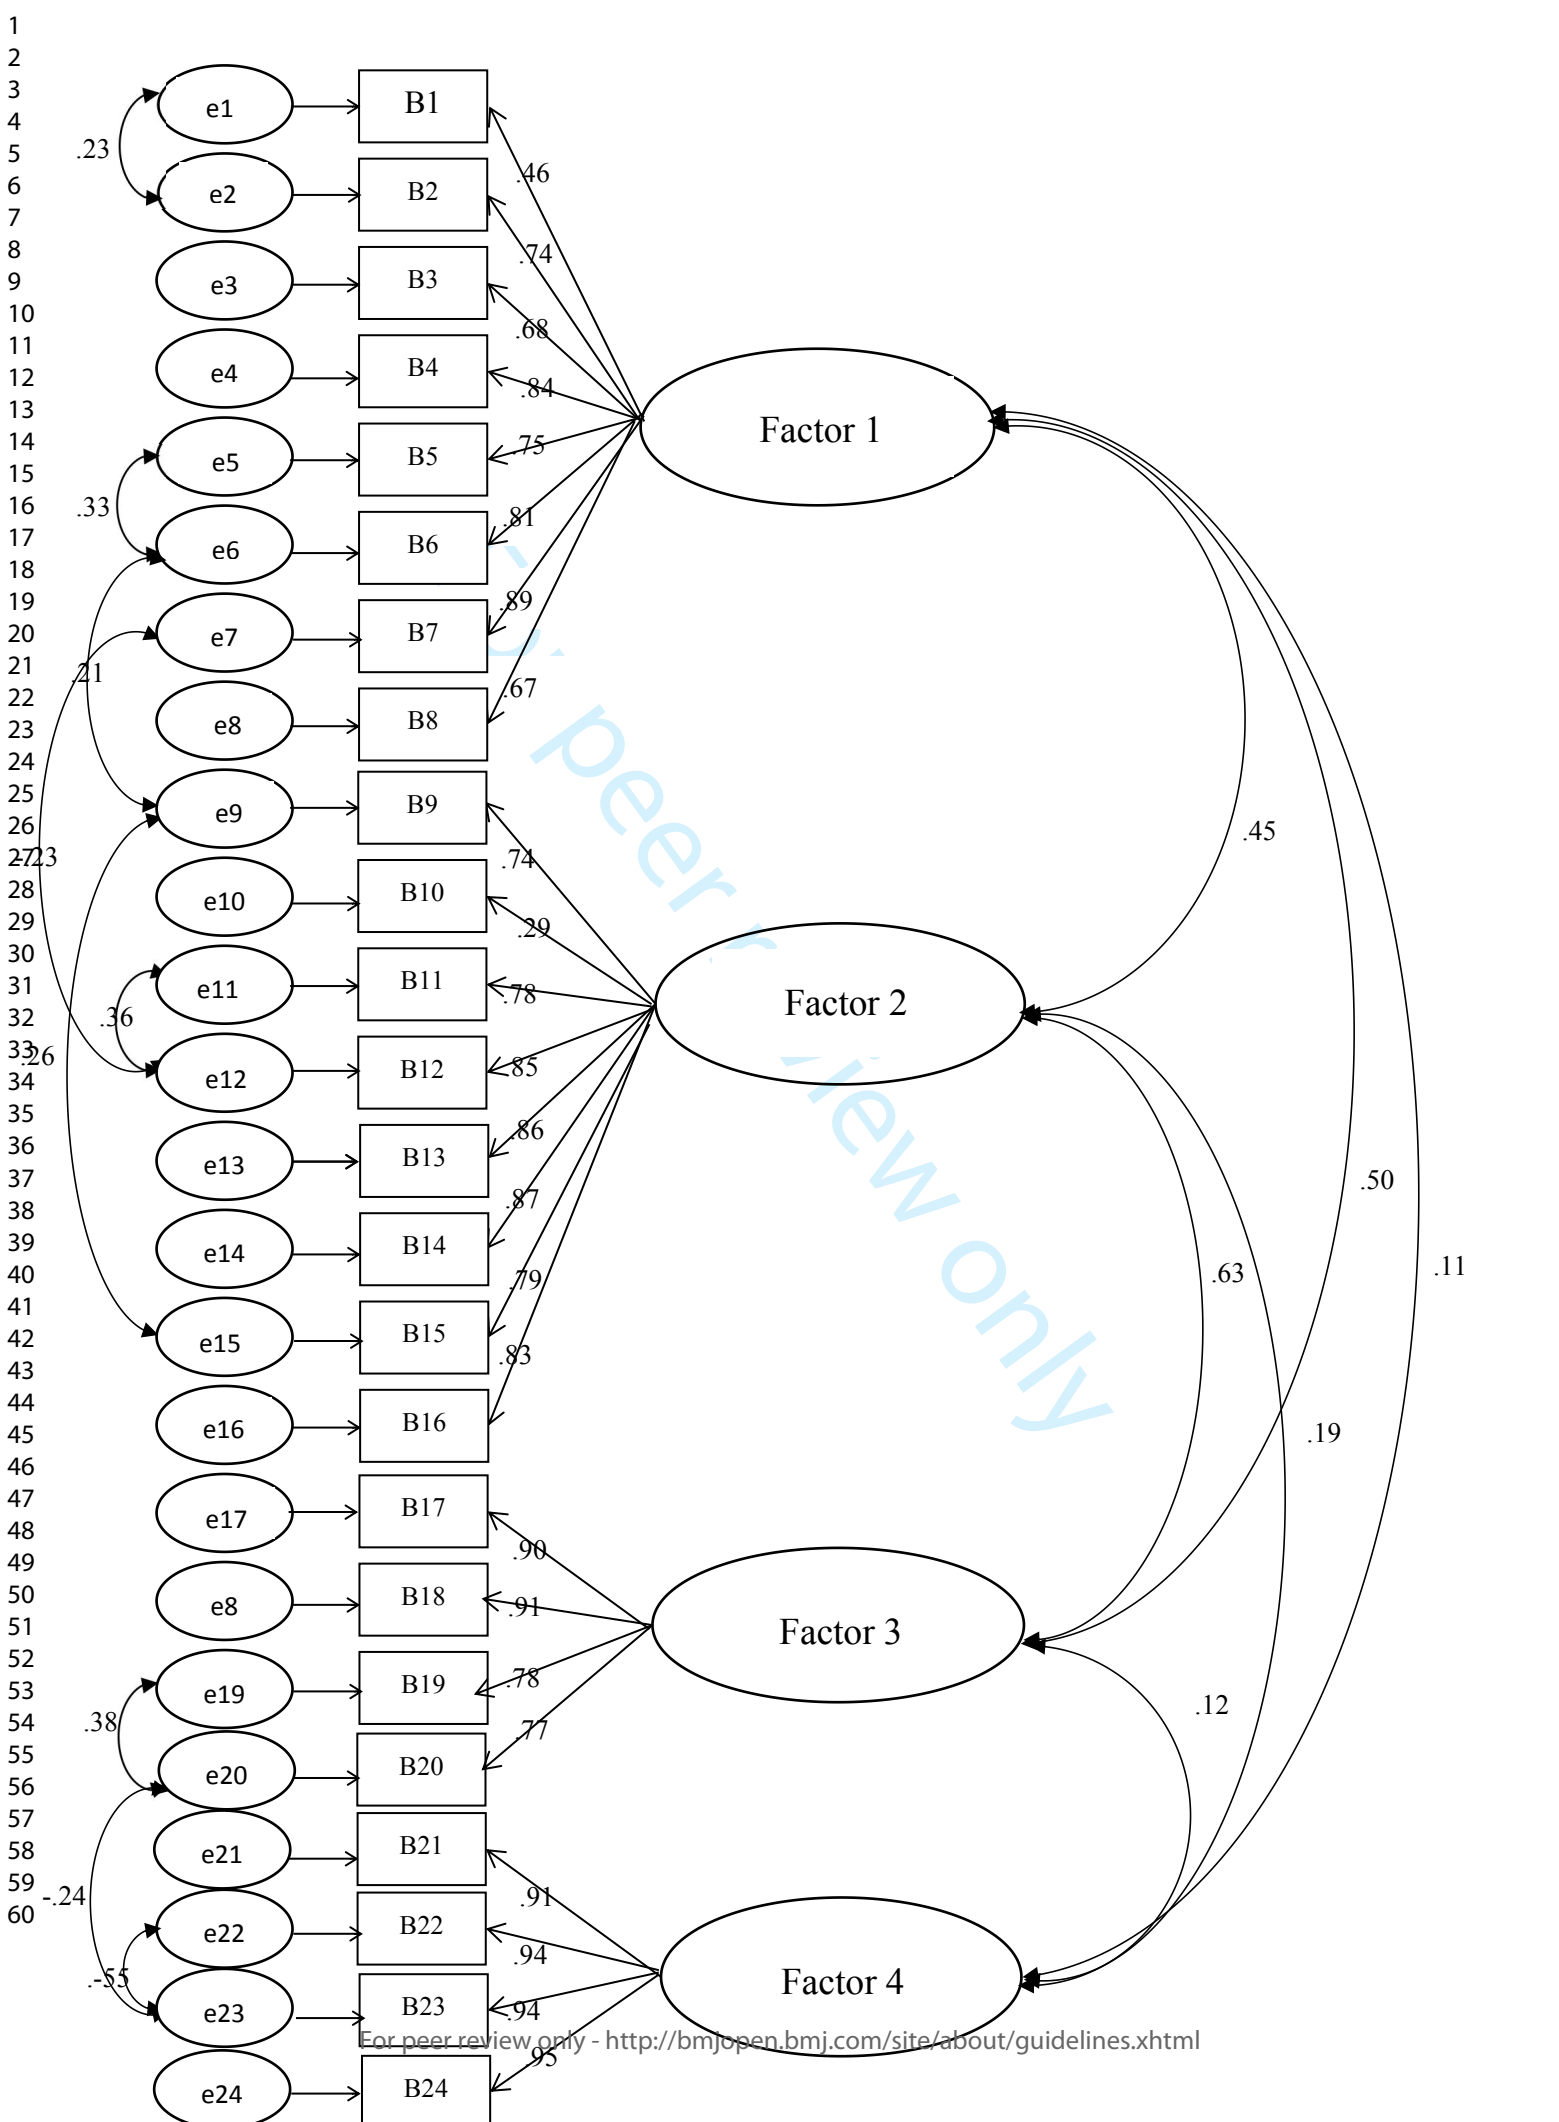

**Figure 2 Fitting figure of modification model of the Chinese version of FaRE Questionnaire**

For peer review only

1  
2  
3  
4  
5  
6  
7  
8  
9  
10  
11  
12  
13  
14  
15  
16  
17  
18  
19  
20  
21  
22  
23  
24  
25  
26  
27  
28  
29  
30  
31  
32  
33  
34  
35  
36  
37  
38  
39  
40  
41  
42  
43  
44  
45  
46  
47  
48  
49  
50  
51  
52  
53  
54  
55  
56  
57  
58  
59  
60

**Table 1. Characteristics of the participants from two sampling**

| Category                            | First sampling<br>(n=249) | Second sampling<br>(n=310) |
|-------------------------------------|---------------------------|----------------------------|
| Marital status                      |                           |                            |
| Single                              | 10 (4)                    | 15 (4.8)                   |
| Married                             | 232 (93.2)                | 286 (92.3)                 |
| Education                           |                           |                            |
| Divorced or widowed                 | 7 (2.8)                   | 9 (2.9)                    |
| Bachelor or above                   | 31 (12.4)                 | 37 (11.9)                  |
| Diploma                             | 31 (12.4)                 | 36 (11.6)                  |
| High school, technical secondary    | 48 (19.3)                 | 59 (19.0)                  |
| Occupation                          |                           |                            |
| Middle school                       | 139 (55.8)                | 178 (57.4)                 |
| On job                              | 59 (23.7)                 | 70 (22.6)                  |
| Sick rest                           | 23 (9.2)                  | 28 (9.0)                   |
| Retirement                          | 34 (13.7)                 | 39 (12.6)                  |
| Unemployed or otherwise             | 133 (53.4)                | 173 (55.8)                 |
| Household per capita monthly income |                           |                            |
| Less than 2000 RMB                  | 93 (37.3)                 | 119 (38.4)                 |
| 2000-3999 RMB                       | 97 (39)                   | 118 (38.1)                 |
| More than 4000 RMB                  | 59 (23.7)                 | 70 (22.6)                  |
| Long-term residence                 |                           |                            |
| Country                             | 117 (47)                  | 150 (48.4)                 |
| Cities and towns                    | 132 (53)                  | 160 (51.6)                 |
| Primary caregiver                   |                           |                            |
| Spouse                              | 146 (58.6)                | 181 (58.4)                 |
| Sons and daughters                  | 58 (23.3)                 | 70 (22.6)                  |
| Parents                             | 21 (8.4)                  | 26 (8.4)                   |
| Oneself                             | 15 (6)                    | 20 (6.5)                   |
| Other                               | 9 (3.6)                   | 13 (4.2)                   |
| Living situation                    |                           |                            |
| Live by oneself                     | 7 (2.8)                   | 8 (2.6)                    |
| Spouse cohabitation                 | 190 (76.3)                | 237 (76.5)                 |
| Two generations live together       | 19 (7.6)                  | 22 (7.1)                   |
| Big family                          | 29 (11.6)                 | 38 (12.3)                  |
| Other                               | 4 (1.6)                   | 5 (1.6)                    |
| Medical expenses payment manner     |                           |                            |
| Medical insurance                   | 95 (38.2)                 | 116 (37.4)                 |
| Rural cooperative medical care      | 140 (56.2)                | 178 (57.4)                 |
| Self pay                            | 14 (5.6)                  | 16 (5.2)                   |
| Treatment of disease                |                           |                            |
| Surgery/ Chemotherapy               | 214 (85.9)                | 266 (85.8)                 |
| Surgery /Chemotherapy/ Radiotherapy | 25 (10)                   | 32 (10.3)                  |
| Surgery/ Chemotherapy /Radiotherapy | 3 (1.2)                   | 3 (1.0)                    |

|                                           |            |            |  |
|-------------------------------------------|------------|------------|--|
| Endocrinotherapy                          |            |            |  |
| Surgery /Chemotherapy /Radiotherapy       | 3 (1.2)    | 4 (1.3)    |  |
| /Molecular targeting treatment            |            |            |  |
| Surgery/ Chemotherapy/ Radiotherapy/      | 1 (0.4)    | 1 (0.3)    |  |
| Endocrinotherapy /Molecular targeting     |            |            |  |
| treatment                                 |            |            |  |
| Surgery/Chemotherapy/Endocrinotherapy     | 1 (0.4)    | 1 (0.3)    |  |
| Surgery /Chemotherapy/Molecular targeting | 2 (0.8)    | 3 (1.0)    |  |
| treatment                                 |            |            |  |
| Surgery way                               |            |            |  |
| Breast conserving surgery                 | 68 (27.3)  | 91 (29.4)  |  |
| Modified radical operation                | 25 (10)    | 28 (9.0)   |  |
| Mastectomy                                | 156 (62.7) | 191 (61.6) |  |
| Complications                             |            |            |  |
| No                                        | 238 (95.6) | 298 (96.1) |  |
| Yes                                       | 11 (4.4)   | 12 (3.9)   |  |
| Family history of disease                 |            |            |  |
| No                                        | 245 (98.4) | 304 (98.1) |  |
| Yes                                       | 4 (1.6)    | 6 (1.9)    |  |

**Table 2 Factor loading matrix after rotation in the Chinese version of FaRE Questionnaire**

| Factor                     | Item                                                                                            | principal component |          |         |          |
|----------------------------|-------------------------------------------------------------------------------------------------|---------------------|----------|---------|----------|
|                            |                                                                                                 | Factor 1            | Factor 2 | Factor3 | Factor 4 |
| Communication and cohesion | B7 Everyone in the family is open to listening other's opinions regarding the illness           | <b>.841</b>         | .173     | .183    | .046     |
|                            | B4 We discuss the illness-related problems until we find a shared solution                      | <b>.834</b>         | .139     | .106    | .070     |
|                            | B6 We are honest when talking about the illness amongst ourselves                               | <b>.807</b>         | .178     | .136    | .038     |
|                            | B5 Everyone in the family feels free to express their own opinion regarding the illness         | <b>.787</b>         | .132     | .118    | .096     |
|                            | B2 In our family we feel that we can talk about how to communicate between us                   | <b>.775</b>         | .036     | .212    | .056     |
|                            | B3 We can deal this illness as a family                                                         | <b>.732</b>         | .165     | .115    | .055     |
|                            | B8 The things we do for each other in dealing with this illness make us feel part of the family | <b>.688</b>         | .120     | .175    | .011     |
|                            | B1 We understand each other with regard                                                         | <b>.476</b>         | .245     | .116    | -.009    |

|  |                                |                                                                                                                   |        |             |             |             |
|--|--------------------------------|-------------------------------------------------------------------------------------------------------------------|--------|-------------|-------------|-------------|
|  |                                | to the experience of illness we are living                                                                        |        |             |             |             |
|  | Perceived social support       | B15 We receive gifts and favours from our closest friends                                                         | .076   | <b>.824</b> | .125        | .044        |
|  |                                | B12 We feels that our closest friends would be happy to support us emotionally in managing the illness            | .249   | <b>.804</b> | .185        | .077        |
|  |                                | B14 We know we are important for our friends                                                                      | .182   | <b>.801</b> | .254        | .040        |
|  |                                | B10 We can rely on our close friends to help us deal this illness                                                 | .035   | <b>.797</b> | .047        | -.001       |
|  |                                | B9 We ask our closest friends to help and assist us in this battle against the illness                            | .185   | <b>.790</b> | .120        | .110        |
|  |                                | B13 We know that if we need comfort, our closest friends will be there for us                                     | .189   | <b>.788</b> | .258        | .095        |
|  |                                | B11 We feel that the people in our social network would be happy to support us emotionally in dealing the illness | .173   | <b>.788</b> | .170        | .052        |
|  |                                | B16 Our friends respect our family for how we reacted to the illness                                              | .241   | <b>.780</b> | .222        | .076        |
|  | Perceived social support       | B17 We believe that we can manage the illness                                                                     | .259   | .266        | <b>.818</b> | -.004       |
|  |                                | B18 We can solve important problems in our life such as this illness                                              | .216   | .313        | <b>.815</b> | .032        |
|  |                                | B19 We feel we are strong enough to cope with this illness                                                        | .300   | .204        | <b>.804</b> | .044        |
|  |                                | B20 We have the strength to solve our problem                                                                     | .231   | .271        | <b>.780</b> | .084        |
|  | Religiousness and Spirituality | B24 We ask our religious/spiritual reference figure for advice or words of comfort about the illness              | .059   | .055        | .019        | <b>.968</b> |
|  |                                | B21 We attend the church / synagogue / mosque/other places of worship                                             | .074   | .101        | .034        | <b>.938</b> |
|  |                                | B23 We participate in the activities of our religious community                                                   | .041   | .060        | .032        | <b>.935</b> |
|  |                                | B22 We believe there is a supreme spiritual being that will help us deal this illness                             | .081   | .098        | .053        | <b>.933</b> |
|  |                                | Eigenvalues                                                                                                       | 3.423  | 9.149       | 1.638       | 3.105       |
|  |                                | Cumulative variance tribute rate (%)                                                                              | 38.120 | 52.383      | 65.320      | 72.146      |



**Table 3 Fitting indexes before and after the model modification**

| Indexes             | $\chi^2/df$ | RMR   | GFI   | CFI   | IFI   | NFI   | RMSEA                                       |
|---------------------|-------------|-------|-------|-------|-------|-------|---------------------------------------------|
| before modification | 2.478       | 0.09  | 0.851 | 0.938 | 0.938 | 0.900 | 0.069                                       |
| after modification  | 1.697       | 0.039 | 0.912 | 0.972 | 0.972 | 0.934 | 0.048                                       |
| reference standards | 1~3         | <0.05 | >0.90 | >0.90 | >0.90 | >0.90 | <0.05 very good<br><0.08 good<br><0.10 fair |

1  
2  
3  
4  
5  
6  
7  
8  
9  
10  
11  
12  
13  
14  
15  
16  
17  
18  
19  
20  
21  
22  
23  
24  
25  
26  
27  
28  
29  
30  
31  
32  
33  
34  
35  
36  
37  
38  
39  
40  
41  
42  
43  
44  
45  
46  
47  
48  
49  
50  
51  
52  
53  
54  
55  
56  
57  
58  
59  
60

For peer review only

# BMJ Open

## Reliability and validity of the Chinese version of the Family Resilience Questionnaire (FaRE Questionnaire) in patients with breast cancer: a cross-sectional study

|                                 |                                                                                                                                                                                                                                                                                                                                                                                                                                                                                                                                                                                                                                                                                                    |
|---------------------------------|----------------------------------------------------------------------------------------------------------------------------------------------------------------------------------------------------------------------------------------------------------------------------------------------------------------------------------------------------------------------------------------------------------------------------------------------------------------------------------------------------------------------------------------------------------------------------------------------------------------------------------------------------------------------------------------------------|
| Journal:                        | <i>BMJ Open</i>                                                                                                                                                                                                                                                                                                                                                                                                                                                                                                                                                                                                                                                                                    |
| Manuscript ID                   | bmjopen-2021-051093.R1                                                                                                                                                                                                                                                                                                                                                                                                                                                                                                                                                                                                                                                                             |
| Article Type:                   | Original research                                                                                                                                                                                                                                                                                                                                                                                                                                                                                                                                                                                                                                                                                  |
| Date Submitted by the Author:   | 18-Nov-2021                                                                                                                                                                                                                                                                                                                                                                                                                                                                                                                                                                                                                                                                                        |
| Complete List of Authors:       | li, mengmeng; Zhengzhou University, School of Nursing and Health; Zhengzhou Central Hospital Affiliated To Zhengzhou University<br>Ma, Rui; Zhengzhou University, College of Psychological Education (Based school)<br>ZHANG, Shanfeng; Zhengzhou University, Experimental Center for Basic Medicine<br>Wang, Shan-shan; Zhengzhou University<br>jiao, jiawei; Zhengzhou University, School of Nursing and Health<br>LIU, Lamei; Zhengzhou University, School of Nursing and Health<br>WANG, Panpan; Zhengzhou University, School of Nursing and Health<br>Zhang, Zhen-xiang; Zhengzhou University, School of Nursing and Health<br>Wang, Peng; Zhengzhou University, School of Nursing and Health |
| <b>Primary Subject Heading</b>: | Nursing                                                                                                                                                                                                                                                                                                                                                                                                                                                                                                                                                                                                                                                                                            |
| Secondary Subject Heading:      | Nursing, Health services research, Oncology                                                                                                                                                                                                                                                                                                                                                                                                                                                                                                                                                                                                                                                        |
| Keywords:                       | ONCOLOGY, PSYCHIATRY, Health policy < HEALTH SERVICES ADMINISTRATION & MANAGEMENT                                                                                                                                                                                                                                                                                                                                                                                                                                                                                                                                                                                                                  |
|                                 |                                                                                                                                                                                                                                                                                                                                                                                                                                                                                                                                                                                                                                                                                                    |

SCHOLARONE™  
Manuscripts



I, the Submitting Author has the right to grant and does grant on behalf of all authors of the Work (as defined in the below author licence), an exclusive licence and/or a non-exclusive licence for contributions from authors who are: i) UK Crown employees; ii) where BMJ has agreed a CC-BY licence shall apply, and/or iii) in accordance with the terms applicable for US Federal Government officers or employees acting as part of their official duties; on a worldwide, perpetual, irrevocable, royalty-free basis to BMJ Publishing Group Ltd ("BMJ") its licensees and where the relevant Journal is co-owned by BMJ to the co-owners of the Journal, to publish the Work in this journal and any other BMJ products and to exploit all rights, as set out in our [licence](#).

The Submitting Author accepts and understands that any supply made under these terms is made by BMJ to the Submitting Author unless you are acting as an employee on behalf of your employer or a postgraduate student of an affiliated institution which is paying any applicable article publishing charge ("APC") for Open Access articles. Where the Submitting Author wishes to make the Work available on an Open Access basis (and intends to pay the relevant APC), the terms of reuse of such Open Access shall be governed by a Creative Commons licence – details of these licences and which [Creative Commons](#) licence will apply to this Work are set out in our licence referred to above.

Other than as permitted in any relevant BMJ Author's Self Archiving Policies, I confirm this Work has not been accepted for publication elsewhere, is not being considered for publication elsewhere and does not duplicate material already published. I confirm all authors consent to publication of this Work and authorise the granting of this licence.

## Title page

**Title:** Reliability and validity of the Chinese version of the Family Resilience Questionnaire (FaRE Questionnaire) in patients with breast cancer: a cross-sectional study

**Author:** Mengmeng Li<sup>1,2#</sup>, Rui Ma<sup>3#</sup>, Shanfeng Zhang<sup>4#</sup>, Shanshan Wang<sup>1</sup>, Jiawei Jiao<sup>1</sup>, Lamei Liu<sup>1</sup>, Panpan Wang<sup>1</sup>, Zhenxiang Zhang<sup>1</sup>, Peng Wang<sup>1\*</sup>

**Corresponding author:** Peng Wang, School of Nursing and Health, Zhengzhou University, Zhengzhou450001,China, [upliz@zzu.edu.cn](mailto:upliz@zzu.edu.cn), 13653815021, 0371-86565001;

**Mengmeng Li**, School of Nursing and Health, Zhengzhou University, Zhengzhou, China; Zhengzhou Central Hospital Affiliated To Zhengzhou University, Zhengzhou, China.

**Rui Ma**, College of Psychological Education (Based school), Zhengzhou University, Zhengzhou, China.

**Shanfeng Zhang**, Experimental Center for Basic Medicine, Zhengzhou University, Zhengzhou, Henan, China.

**Shanshan Wang**, School of Nursing and Health, Zhengzhou University, Zhengzhou, China.

**Jiawei Jiao**, School of Nursing and Health, Zhengzhou University, Zhengzhou, China.

**Lamei Liu**, School of Nursing and Health, Zhengzhou University, Zhengzhou, China.

**Panpan Wang**, School of Nursing and Health, Zhengzhou University, Zhengzhou, China.

**Zhenxiang Zhang**, School of Nursing and Health, Zhengzhou University, Zhengzhou, China.

**Peng Wang**, School of Nursing and Health, Zhengzhou University, Zhengzhou, China.

**Keywords:** breast cancer; family resilience; nursing; healthcare

**Word count:** 4000

1  
2  
3  
4 **Reliability and validity of the Chinese version of the Family Resilience**  
5  
6 **Questionnaire (FaRE Questionnaire) in patients with breast cancer: a**  
7  
8 **cross-sectional study**  
9

10  
11 **ABSTRACT**  
12

13  
14 **Objective** The objective of this study is to translate, adapt, and evaluate the Chinese version of  
15  
16 Family Resilience Questionnaire and to measure the reliability and validity of the instrument  
17  
18 among patients with breast cancer in China.  
19

20  
21  
22 **Design** It was a cross-sectional study, which involved translation, back-translation, adaption, and  
23  
24 psychometric testing of a 24-item Likert-type family resilience measurement.  
25

26  
27 **Setting** Three tertiary hospitals in Zhengzhou, China.  
28

29  
30 **Participants** A total of 559 patients with breast cancer completed the study.  
31

32  
33 **Primary outcome measures** The primary outcome measures considered in this study were FaRE  
34  
35 Questionnaire and General Information Questionnaire. Cronbach's  $\alpha$  coefficient was used to  
36  
37 examine the internal consistency. The test-retest reliability was calculated using the intraclass  
38  
39 correlation coefficient on 30 participants. Content validity was assessed by six experts. Construct  
40  
41 validity test was performed using factor analysis including exploratory factor analysis and  
42  
43 confirmatory factor analysis.  
44  
45  
46

47  
48 **Results** For the Chinese version of FaRE questionnaire, the Cronbach's  $\alpha$  coefficient of the total  
49  
50 questionnaire was 0.909, and the Cronbach's  $\alpha$  coefficients of four factors ranged from 0.902 to  
51  
52 0.963. The test-retest reliability coefficient of the total questionnaire was 0.905. The  
53  
54 Scale-Content Validity Index (S-CVI) was 0.97, and Item-Content Validity Index (I-CVI) ranged  
55  
56 from 0.83 to 1.00. The questionnaire included 24 items, exploratory factor analysis extracted four  
57  
58  
59  
60

factors with loading > 0.4, which could explain 72.146% of the total variance. Confirmatory factor analysis showed the Chinese version of FaRE questionnaire had an excellent four-factor model consistent with the original questionnaire.

**Conclusion** The Chinese version of FaRE Questionnaire has acceptable reliability and validity among patients with breast cancer in China. It can effectively assess family resilience and provide basis for personalized family resilience interventions for patients with breast cancer.

#### **Strengths and limitations of this study**

- ▶ To our knowledge, this was the first study on the psychometrics of the Chinese translation of the FaRE Questionnaire.
- ▶ Strict Chinesization procedures, sufficient sample size, Precise statistics methods.
- ▶ The findings of our study were only based on data from patients from three hospitals in Zhengzhou, which may not be representative of patients with breast cancer in mainland China.
- ▶ Convergent validity assessment and evaluation of sensitivity of 4 factors will be considered.

#### **Introduction**

Breast cancer had the highest incidence in new cancer cases, whose morbidity and mortality were respectively 24.2%, 15.0% in women and topped the list according to the latest global cancer statistics in 2018<sup>[1]</sup>. Among the malignant tumors in China, breast cancer ranked fifth, and breast cancer ranked first among female malignant tumors. Although the development of medical technology makes the survival time of breast cancer patients significantly prolonged<sup>[2]</sup>, diagnosis of breast cancer, mastectomy and long-term postoperative chemoradiotherapy also inevitably lead to severe adverse stress reactions. Meanwhile, breast cancer is not just a personal

1  
2  
3  
4 event. It is also a more critical family event<sup>[3]</sup>. According to Bowen family systems  
5  
6 theory<sup>[4]</sup>, cancer diagnosis and related clinical treatment of a family member may  
7  
8 cause patients and their families to be in a state of adverse and high stress, and  
9  
10 ultimately affect the stability and balance of the whole family system<sup>[5]</sup>. Previous  
11  
12 studies on family stress of breast cancer patients mainly focused on two aspects. One  
13  
14 is negative emotions of patients with breast cancer such as anxiety, pessimism, fear<sup>[6-7]</sup>  
15  
16 and depression<sup>[8]</sup> and descending quality of life<sup>[9]</sup> and their family members'  
17  
18 psychological distress<sup>[10]</sup>, physical burden<sup>[11]</sup>, psychosocial burden and economic  
19  
20 burden<sup>[12]</sup>. Another is a variety of adverse family stress reactions including family  
21  
22 dysfunction<sup>[13-14]</sup> and reduced family life quality of patients with breast cancer<sup>[15]</sup>.

23  
24  
25  
26  
27  
28  
29  
30 With the proposing of family systems theory and the rising of positive  
31  
32 psychology, while discussing the negative impact of cancer on the whole family,  
33  
34 domestic and foreign scholars also found that families of cancer patients have positive  
35  
36 resilience<sup>[16]</sup>. Researches showed that the focus of research on family stress of cancer  
37  
38 patients has gradually shifted to the strength and power of family, namely, family  
39  
40 resilience, which has been widely used in psychology and nursing<sup>[17]</sup>. Family  
41  
42 resilience is defined as an attribute that helps families face changes, overcome  
43  
44 adversity and adapt to the crisis. Strong family resilience can not only improve the  
45  
46 physical and mental health of patients and their family members but also maintain  
47  
48 healthy family functions and ultimately promote a virtuous cycle of family  
49  
50 functions<sup>[18]</sup>. At the same time, compared with other types of cancer, breast cancer has  
51  
52 more significant impacts on patients, their spouses, family members, conjugal  
53  
54  
55  
56  
57  
58  
59  
60



1  
2  
3  
4 relationships and family function<sup>[18]</sup>. Thus, for breast cancer patients, family resilience  
5  
6 may provide a new theoretical basis for interventions to improve family crisis.  
7  
8  
9 Therefore it is vital to assess the family resilience of breast cancer accurately.

10  
11 However, domestic research on family resilience of patients with breast cancer in  
12  
13 China is less, and there is still a lack of effective assessment tools. Family Resilience  
14  
15 Questionnaire was compiled based on Walsh Family Resilience Model by Italian  
16  
17 scholar Faccio et al<sup>[19]</sup>. It includes 24 items and four dimensions: communication and  
18  
19 cohesion, perceived social support, perceived family coping, religiousness and  
20  
21 spirituality. The FaRE Questionnaire is used to measure family resilience, more  
22  
23 specifically, the family dynamics and resources and estimating the adaptation  
24  
25 flexibility to cancer disease. The questionnaire has been tested in patients with breast  
26  
27 cancer in Italy and has good reliability and validity<sup>[19]</sup>. Thus the purpose of our study  
28  
29 is to provide an effective tool for assessing the family resilience of Chinese breast  
30  
31 cancer patients by Chinese localization and psychometric testing of FaRE questionnaire.  
32  
33  
34  
35  
36  
37  
38  
39

## 40 **Methods**

### 41 **Study Design**

42  
43 The study is a cross-sectional study. The study was approved by the Ethics  
44  
45 Committee of Zhengzhou University (ZZURIB 2020-19) and all patients involved  
46  
47 provided informed written consent. In the study, patients with breast cancer were  
48  
49 recruited from three hospitals in Zhengzhou from December 2019 to February 2020  
50  
51 and From August 2020 to September 2020. The diagnosis criteria of breast cancer  
52  
53 were as follows: (1) histopathological examination confirms breast cancer; (2) aged  
54  
55  
56  
57  
58  
59  
60

1  
2  
3  
4 18 years or older; (3) able to read and write Chinese; (4) informed consent and  
5  
6 voluntary participation in the study. Criteria for exclusion were as follows: (1)  
7  
8 sufferers with mental disorders and communication difficulties; (2) no history of  
9  
10 other serious life-threatening diseases.  
11  
12

13  
14 Data were collected in two sampling sessions. The first sampling was used for  
15  
16 item analysis, exploratory factor analysis, and internal consistency. The sample size  
17  
18 should be at least 5 to 10 times that of the questionnaire items<sup>[20]</sup>, our Questionnaire  
19  
20 contains 24 items. The study's sample size was calculated as 8 times of the items, and  
21  
22 the sample loss rate of 15% was taken into account. Therefore, the required sample  
23  
24 size was 221 cases. Actually, two hundred and forty-nine valid questionnaires were  
25  
26 collected in this section finally. In addition, clinical data from a subgroup of 30  
27  
28 patients from different age groups were collected again for two week after the initial  
29  
30 collection to assess the test-retest reliability of the FaRE questionnaire. The second  
31  
32 sampling was used for confirmatory factor analysis. It is generally believed that the  
33  
34 sample size required for confirmatory factor analysis should not be less than 300  
35  
36 cases<sup>[20]</sup>, 310 cases of valid questionnaires were collected finally.  
37  
38  
39  
40  
41  
42  
43  
44

### 45 **Measurements**

46  
47 Demographic characteristics and clinical data were collected using the General  
48  
49 Information Questionnaire, the Chinese version of the Family Resilience  
50  
51 Questionnaire.  
52  
53

54  
55 **General Information Questionnaire.** It is a questionnaire designed by the research  
56  
57 team, which included some questions on age, religious faith, marital status, education,  
58  
59  
60

1  
2  
3  
4 occupation, Household per capita monthly income, Long-term residence, primary  
5  
6 caregiver, living situation, payment manner of the medical expenses, treatment of  
7  
8 disease, surgery way, complication, family history of the disease.  
9

10  
11 **The Chinese version of the Family Resilience Questionnaire.** The questionnaire  
12  
13 was developed by Faccio in 2019 according to the Walsh Family Resilience Model  
14  
15 based on breast cancer and prostate cancer patients<sup>[19]</sup>. It comprises 24 items, and four  
16  
17 dimensions: communication and cohesion(8 items), perceived social support(8 items),  
18  
19 perceived family coping(4 items), religiousness and spirituality(4 items). The  
20  
21 Cronbach's  $\alpha$  coefficients of four dimensions were 0.88, 0.88, 0.82 and 0.86  
22  
23 respectively in the original questionnaire, and it had good reliability and validity.  
24  
25 Questionnaire respondents indicate to what extent they agree with the items on a  
26  
27 seven-point scale method from 'strongly disagree' (scored 1) to 'strongly  
28  
29 agree'(scored 7). Adding score of each item in the FaRE Questionnaire together can  
30  
31 get total scores. Higher scores on the FaRE questionnaire reflect higher family  
32  
33 resilience levels.  
34  
35  
36  
37  
38  
39  
40  
41  
42

### 43 **Chinesization process**

44  
45 The use of the the FaRE questionnaire was authorized by the original author Professor  
46  
47 Faccio. The questionnaire was translated into Chinese and adapted cross-culturally  
48  
49 using the Brislin translation pattern<sup>[20]</sup>. The translation process was as follow<sup>s[21]</sup>: (1)  
50  
51 Forward translation: two translators, including a bilingual graduate student and a  
52  
53 bilingual Ph.D. student, independently translated the FaRE questionnaire from  
54  
55 English into Chinese; (2) Proofreading: our research group compared two different  
56  
57  
58  
59  
60

1  
2  
3  
4 Chinese versions and made modifications and adjustments to form a harmonized  
5  
6 version of two translated versions; (3) Back translation: two graduate students  
7  
8 majored in English who didn't see the original English version of the questionnaire  
9  
10 independently translated FaRE questionnaire from Chinese into English. On the  
11  
12 premise of being faithful to the original questionnaire, researchers carried out forward  
13  
14 translation and back translation again by comparing the translated English  
15  
16 questionnaire with the original one to make consistent. (4) Cross-cultural adaptation:  
17  
18 Expert panel including two psychologists, two specialists in clinical medicine, two  
19  
20 specialists in clinical nursing independently reviewed the original, proofread and  
21  
22 translated version of the questionnaire to give their opinions on cultural equivalency  
23  
24 and the appropriateness of language translation. Moreover, they were asked to rate  
25  
26 each item on a four-point Likert type scale ranging from 1 (uncorrelated) to 4  
27  
28 (strongly correlated) so as to evaluate the content validity of the questionnaire. The  
29  
30 researchers will choose the most appropriate way of Chinese expression according to  
31  
32 the suggestions. (5) Pretest: 30 breast cancer patients were interviewed in-depth about  
33  
34 their understanding of the items, and the items with vague semantics and difficult to  
35  
36 understand were timely modified. (6) Combined with the results of expert  
37  
38 consultation and pretest form a final Chinese version of the Family Resilience  
39  
40 Questionnaire.  
41  
42  
43  
44  
45  
46  
47  
48  
49  
50  
51  
52

### 53 **Data collection**

54  
55 During the survey, the researchers receiving standardized training explained the  
56  
57 purpose of the study and the filling method of the questionnaire to the patients in the  
58  
59  
60

1  
2  
3  
4 unified training language. The General Information Questionnaire and Chinese  
5  
6 version of the Family Resilience Questionnaire were administered to each breast  
7  
8 patient. All patients could complete the questionnaire by themselves. Every survey  
9  
10 took about 15-20 minutes to complete.  
11  
12

### 13 14 **Patient and public involvement statement**

15  
16 Patients or the public were not involved in the design, or conduct, or reporting, or dissemination  
17  
18 plans of this research. The patients were involved in the study by completing the  
19  
20 questionnaires face-to-face.  
21  
22

### 23 24 **Statistical analysis**

25  
26 IBM SPSS software version 21.0 and AMOS software version 21.0 were used for the  
27  
28 statistical analysis. Descriptive statistics were used to summarize the breast cancer  
29  
30 patients' demographic characteristics. Item analysis, validity and reliability of the  
31  
32 questionnaire were assessed. All analyses used two-tailed p values and  $p < 0.05$  was  
33  
34 considered statistically significant.  
35  
36  
37  
38

### 39 40 **Item analysis**

41  
42 It means to analyze and test the quality of each item, whose purpose is to test the  
43  
44 suitability or reliability of instruments and individual items. Its results can be used as  
45  
46 the basis for the screening or modification of individual items, to enhance the  
47  
48 effectiveness of the questionnaire for the subjects. In this study, the critical value  
49  
50 method and item-total score correlation method were used for item analysis. The  
51  
52 items with correlation coefficient less than 0.4 or not reaching the significant level  
53  
54 were deleted<sup>[22]</sup>.  
55  
56  
57  
58  
59  
60

### Reliability analysis

Internal consistency referred to the items' homogeneity and internal correlation between instruments, which was assessed using the Cronbach's  $\alpha$  coefficient. Scores greater than or equal to 0.7 were considered acceptable<sup>[23]</sup>. More scores indicated more excellent internal consistency.

Test-retest reliability was used to reflect the temporal stability of the questionnaire by calculating the Pearson correlation coefficient of the total score and each factor. Scores of 0.70-0.89 were considered strong, and those higher than 0.90 were considered very strong.

### Validity analysis

Content validity of the questionnaire was assessed by expert consultation, which was assessed using the item-level content validity index (I-CVI) and the scale-level content validity index (S-CVI) by calculating the agreement proportion of items from all the experts. Six experts rated the correlation between each item and its dimension of the Chinese family resilience questionnaire, 1 = not related, 2 = weak correlation, 3 = more relevant, 4 = very relevant. I-CVI means that each item appropriately reflect the extent of the concept to be measured, and S-CVI reflects the mean value of I-CVI of all items. I-CVI  $\geq$  0.78 and S-CVI  $\geq$  0.90 are considered acceptable<sup>[23]</sup>.

The exploratory factor analysis and confirmatory factor analysis were used to assess construct validity<sup>[24]</sup>. Kaise-Meyer-Olkin (KMO) test and Bartlett's  $\chi^2$  test were used to examine the suitability for factor analysis. For the explanatory factor analysis, a load of more than 0.4 of the item on a factor was used as a factor attribution

1  
2  
3  
4 criterion. Load less than 0.4 or double load was used as the criteria for deleting the  
5  
6 item would be deleted<sup>[22]</sup>. Confirmatory factor analysis was used to examine the  
7  
8  
9  
10  
11  
12  
13  
14  
15  
16  
17  
18  
19  
20  
21  
22  
23  
24  
25  
26  
27  
28  
29  
30  
31  
32  
33  
34  
35  
36  
37  
38  
39  
40  
41  
42  
43  
44  
45  
46  
47  
48  
49  
50  
51  
52  
53  
54  
55  
56  
57  
58  
59  
60  
Questionnaire four-factor model. Chi-square degree of freedom ratio, Root Mean  
Square Residual, Goodness of fit index, Comparative fit index, Incremental fit index  
as well as Root Mean Square Error Approximate was used to evaluate the model<sup>[22]</sup>.

## Results

### Demographic and clinical characteristics

All the breast cancer patients were female. The patients' age of the first sampling was 20~78 (45.77±10.09) years old, and the second sampling was 22~73 (45.7±10.213) years old. The demographic and clinical characteristics of the sample were shown in Table 1.

Table 1 Characteristics of the participants from two sampling

| Category                            | First sampling<br>(n=249) | Second sampling<br>(n=310) |
|-------------------------------------|---------------------------|----------------------------|
| Marital status                      |                           |                            |
| Single                              | 10 (4)                    | 15 (4.8)                   |
| Married                             | 232 (93.2)                | 286 (92.3)                 |
| Education                           |                           |                            |
| Divorced or widowed                 | 7 (2.8)                   | 9 (2.9)                    |
| Bachelor or above                   | 31 (12.4)                 | 37 (11.9)                  |
| Diploma                             | 31 (12.4)                 | 36 (11.6)                  |
| High school, technical secondary    | 48 (19.3)                 | 59 (19.0)                  |
| Occupation                          |                           |                            |
| Middle school                       | 139 (55.8)                | 178 (57.4)                 |
| On job                              | 59 (23.7)                 | 70 (22.6)                  |
| Sick rest                           | 23 (9.2)                  | 28 (9.0)                   |
| Retirement                          | 34 (13.7)                 | 39 (12.6)                  |
| Unemployed or otherwise             | 133 (53.4)                | 173 (55.8)                 |
| Household per capita monthly income |                           |                            |
| Less than 2000 RMB                  | 93 (37.3)                 | 119 (38.4)                 |
| 2000-3999 RMB                       | 97 (39)                   | 118 (38.1)                 |
| More than 4000 RMB                  | 59 (23.7)                 | 70 (22.6)                  |
| Long-term residence                 |                           |                            |

|                                           |            |            |
|-------------------------------------------|------------|------------|
| Country                                   | 117 (47)   | 150 (48.4) |
| Cities and towns                          | 132 (53)   | 160 (51.6) |
| Primary caregiver                         |            |            |
| Spouse                                    | 146 (58.6) | 181 (58.4) |
| Sons and daughters                        | 58 (23.3)  | 70 (22.6)  |
| Parents                                   | 21 (8.4)   | 26 (8.4)   |
| Oneself                                   | 15 (6)     | 20 (6.5)   |
| Other                                     | 9 (3.6)    | 13 (4.2)   |
| Living situation                          |            |            |
| Live by oneself                           | 7 (2.8)    | 8 (2.6)    |
| Spouse cohabitation                       | 190 (76.3) | 237 (76.5) |
| Two generations live together             | 19 (7.6)   | 22 (7.1)   |
| Big family                                | 29 (11.6)  | 38 (12.3)  |
| Other                                     | 4 (1.6)    | 5 (1.6)    |
| Medical expenses payment manner           |            |            |
| Medical insurance                         | 95 (38.2)  | 116 (37.4) |
| Rural cooperative medical care            | 140 (56.2) | 178 (57.4) |
| Self pay                                  | 14 (5.6)   | 16 (5.2)   |
| Treatment of disease                      |            |            |
| Surgery/ Chemotherapy                     | 214 (85.9) | 266 (85.8) |
| Surgery /Chemotherapy/ Radiotherapy       | 25 (10)    | 32 (10.3)  |
| Surgery/ Chemotherapy /Radiotherapy       | 3 (1.2)    | 3 (1.0)    |
| Endocrinotherapy                          |            |            |
| Surgery /Chemotherapy /Radiotherapy       | 3 (1.2)    | 4 (1.3)    |
| /Molecular targeting treatment            |            |            |
| Surgery/ Chemotherapy/ Radiotherapy/      | 1 (0.4)    | 1 (0.3)    |
| Endocrinotherapy /Molecular targeting     |            |            |
| treatment                                 |            |            |
| Surgery/Chemotherapy/Endocrinotherapy     | 1 (0.4)    | 1 (0.3)    |
| Surgery /Chemotherapy/Molecular targeting | 2 (0.8)    | 3 (1.0)    |
| treatment                                 |            |            |
| Surgery way                               |            |            |
| Breast conserving surgery                 | 68 (27.3)  | 91 (29.4)  |
| Modified radical operation                | 25 (10)    | 28 (9.0)   |
| Mastectomy                                | 156 (62.7) | 191 (61.6) |
| Complications                             |            |            |
| No                                        | 238 (95.6) | 298 (96.1) |
| Yes                                       | 11 (4.4)   | 12 (3.9)   |
| Family history of disease                 |            |            |
| No                                        | 245 (98.4) | 304 (98.1) |
| Yes                                       | 4 (1.6)    | 6 (1.9)    |

### Cross-cultural adaption

During the expert consultation process, a psychologist believed the Chinese



1  
2  
3  
4 expression of Item 3 ‘We can deal with illness as a family’ was hard to understand. He  
5  
6 suggested changing it with a substitute word and adjusting the word order. Another  
7  
8 experts believed that ‘social network’ in item 11 ‘We feel that the people in our social  
9  
10 network would be happy to support us emotionally in dealing the illness’ was easily  
11  
12 confused with social platforms on the Internet in Chinese. They suggested changing  
13  
14 it to ‘social circle’. In addition, expert thought the Chinese expressions of Item 16  
15  
16 ‘Our friends respect our family for how we reacted to the illness’ and Item 17 ‘We  
17  
18 believe that we can manage the illness’ had ambiguities. Combined with the feedback  
19  
20 of the subjects in the pretest, we did appropriate readjustment suitable for Chinese  
21  
22 cultural background. During the pretesting, almost all patients thought the Chinese  
23  
24 expressions of Item 1 ‘We understand each other with regard to the experience of  
25  
26 illness we are living’ was inappropriate and hard to understand. To clarify the  
27  
28 meaning of this item for the participants, after communicating with the original author,  
29  
30 we made amendments.  
31  
32  
33  
34  
35  
36  
37  
38  
39

#### 40 **Item analysis**

41  
42 **correlation analysis.** The correlation analysis showed that the correlation coefficient  
43  
44 between the score of each item and the total score of the questionnaire was  
45  
46 0.437~0.712 ( $P<0.01$ ), both greater than 0.4. Thus, all items were reserved.  
47  
48  
49

50 **Extreme Value Method.** Critical value method was used as the test index to analyze  
51  
52 the distinction between entries in the Chinese version of the family resilience  
53  
54 questionnaire. It showed that the differences among all items were statistically  
55  
56 significant ( $P<0.01$ ).  
57  
58  
59  
60

## Reliability

**Internal consistency.** The Cronbach's  $\alpha$  coefficients for the total Chinese version of Family Resilience Questionnaire was 0.909. Cronbach's  $\alpha$  coefficients of four factors were 0.902, 0.932, 0.905, 0.963 respectively.

**Test-retest reliability.** The test-retest reliability for the total Chinese version of Family Resilience Questionnaire was 0.905, which respectively were 0.952, 0.949, 0.968, 0.942.

## Validity

**Content validity.** For the expert panel, the scale-level content validity index (S-CVI) was 0.97, and the item-level content validity index (I-CVI) ranged from 0.83 to 1.00.

**Construct validity.** For exploratory factor analysis, KMO value was 0.907, indicating that the data were suitable for factor analysis, and Bartlett's test of sphericity was 5006.376 ( $P < 0.001$ ), suggesting that extraction of common factors could explain most of the statistical information which questionnaire entries represented<sup>[22]</sup>. Four common factors with eigenvalue  $> 1$  were extracted by principal component analysis, which could explain 72.146% of the total variance. Furthermore, four common factors extracted are consistent with the four subscales of the original English questionnaire. The load of each item on its dimension in the component matrix was  $> 0.40$  (minimum value:0.476; maximum value:0.968) by maximum variance orthogonal rotation. The final four common factors extracted in this study were consistent with the original questionnaire. Factor 1 was named Communication and cohesion, Factor 2 was named Perceived social support, Factor 3 was named

Perceived family coping and factor 4 was named Religiousness and Spirituality. See the component matrix of each factor in Table 2.

**Table 2 Factor loading matrix after rotation in the Chinese version of FaRE Questionnaire**

| Factor                         | Item                                                                                                              | principal component |             |             |             |
|--------------------------------|-------------------------------------------------------------------------------------------------------------------|---------------------|-------------|-------------|-------------|
|                                |                                                                                                                   | Factor 1            | Factor 2    | Factor3     | Factor 4    |
| Communication and cohesion     | B7 Everyone in the family is open to listening other's opinions regarding the illness                             | <b>.841</b>         | .173        | .183        | .046        |
|                                | B4 We discuss the illness-related problems until we find a shared solution                                        | <b>.834</b>         | .139        | .106        | .070        |
|                                | B6 We are honest when talking about the illness amongst ourselves                                                 | <b>.807</b>         | .178        | .136        | .038        |
|                                | B5 Everyone in the family feels free to express their own opinion regarding the illness                           | <b>.787</b>         | .132        | .118        | .096        |
|                                | B2 In our family we feel that we can talk about how to communicate between us                                     | <b>.775</b>         | .036        | .212        | .056        |
|                                | B3 We can deal this illness as a family                                                                           | <b>.732</b>         | .165        | .115        | .055        |
|                                | B8 The things we do for each other in dealing with this illness make us feel part of the family                   | <b>.688</b>         | .120        | .175        | .011        |
|                                | B1 We understand each other with regard to the experience of illness we are living                                | <b>.476</b>         | .245        | .116        | -.009       |
| Perceived social support       | B15 We receive gifts and favours from our closest friends                                                         | .076                | <b>.824</b> | .125        | .044        |
|                                | B12 We feels that our closest friends would be happy to support us emotionally in managing the illness            | .249                | <b>.804</b> | .185        | .077        |
|                                | B14 We know we are important for our friends                                                                      | .182                | <b>.801</b> | .254        | .040        |
|                                | B10 We can rely on our close friends to help us deal this illness                                                 | .035                | <b>.797</b> | .047        | -.001       |
|                                | B9 We ask our closest friends to help and assist us in this battle against the illness                            | .185                | <b>.790</b> | .120        | .110        |
|                                | B13 We know that if we need comfort, our closest friends will be there for us                                     | .189                | <b>.788</b> | .258        | .095        |
|                                | B11 We feel that the people in our social network would be happy to support us emotionally in dealing the illness | .173                | <b>.788</b> | .170        | .052        |
| Perceived social support       | B16 Our friends respect our family for how we reacted to the illness                                              | .241                | <b>.780</b> | .222        | .076        |
|                                | B17 We believe that we can manage the illness                                                                     | .259                | .266        | <b>.818</b> | -.004       |
|                                | B18 We can solve important problems in our life such as this illness                                              | .216                | .313        | <b>.815</b> | .032        |
|                                | B19 We feel we are strong enough to cope with this illness                                                        | .300                | .204        | <b>.804</b> | .044        |
|                                | B20 We have the strength to solve our problem                                                                     | .231                | .271        | <b>.780</b> | .084        |
| Religiousness and Spirituality | B24 We ask our religious/spiritual reference figure for advice or words of comfort about the illness              | .059                | .055        | .019        | <b>.968</b> |
|                                | B21 We attend the church / synagogue / mosque/other places                                                        | .074                | .101        | .034        | <b>.938</b> |

|    |                                                             |        |        |        |             |
|----|-------------------------------------------------------------|--------|--------|--------|-------------|
| 1  |                                                             |        |        |        |             |
| 2  |                                                             |        |        |        |             |
| 3  | of worship                                                  |        |        |        |             |
| 4  | B23 We participate in the activities of our religious       | .041   | .060   | .032   | <b>.935</b> |
| 5  | community                                                   |        |        |        |             |
| 6  |                                                             |        |        |        |             |
| 7  | B22 We believe there is a supreme spiritual being that will | .081   | .098   | .053   | <b>.933</b> |
| 8  | help us deal this illness                                   |        |        |        |             |
| 9  |                                                             |        |        |        |             |
| 10 | Eigenvalues                                                 | 3.423  | 9.149  | 1.638  | 3.105       |
| 11 | Cumulative variance tribute rate (%)                        | 38.120 | 52.383 | 65.320 | 72.146      |
| 12 |                                                             |        |        |        |             |

To further verify the structural validity of the questionnaire, 310 samples were subjected to confirmatory factor analysis using AMOS 21.0 software. According to the structure and dimension of the original questionnaire, Communication and cohesion, Perceived social support, Perceived family coping and Religiousness and Spirituality were set as four latent variables. And the factor structure including 24 items was set as observation variable to establish a preset model of confirmatory factor analysis. Normality test for the collected data showed that each item's skewness index was far < 3, kurtosis index of was far < 8. The data were normally distributed. Therefore, the maximum likelihood method was adopted to estimate the parameter model. The initial model fitting results were shown in Figure 1.

The fitting indexes of the initial model were not ideal, which indicated the deviation between the default model and the actual observation data. It needed to be revised. The model was revised on the basis of the original hypothesis model. The modification index of the model was defined as 4. If the modification index was greater than 4, it meant that the model needed to be modified. Fitting indexes both were greater than 0.9 after the modification of the default model, which reached an acceptable range (Figure2). See Table 3 for the fitting indexes before and after the modification.

**Table 3 Fitting indexes before and after the model modification**

| Indexes             | $\chi^2/df$ | RMR   | GFI   | CFI   | IFI   | NFI   | RMSEA                                       |
|---------------------|-------------|-------|-------|-------|-------|-------|---------------------------------------------|
| before modification | 2.478       | 0.09  | 0.851 | 0.938 | 0.938 | 0.900 | 0.069                                       |
| after modification  | 1.697       | 0.039 | 0.912 | 0.972 | 0.972 | 0.934 | 0.048                                       |
| reference standards | 1~3         | <0.05 | >0.90 | >0.90 | >0.90 | >0.90 | <0.05 very good<br><0.08 good<br><0.10 fair |

## Discussion

The FaRE Questionnaire is an instrument designed to measure family resilience among patients with cancer<sup>[19]</sup>. The study was conducted to determine whether the FaRE Questionnaire could be used among Chinese patients with breast cancer in mainland China. Through literature review, the Chinese research status of family resilience was not profound enough, especially for patients with breast cancer. Accurately assessing the family resilience of breast cancer patients is the basis. A recent review showed that instruments for family resilience in patients with breast cancer lacked localization<sup>[25]</sup>. Thus we translated the FaRE Questionnaire into Chinese using forward and back-translation, expert review, cultural adaption and pilot testing to ensure the semantic equivalence and intelligibility of the Chinese version of the questionnaire. We also examined the reliability and validity of the Chinese version of the FaRE Questionnaire using item analysis, reliability, content validity, exploratory factor analysis, and confirmatory factor analysis.

Previously, the original Italian version of the questionnaire was proved to be reliable and valid among a total of 213 patients with histologically confirmed

1  
2  
3  
4 non-metastatic breast or prostate cancer. Nevertheless, patients' lifestyles and cultural  
5  
6 backgrounds in China are different from Italy. Our study suggested that the FaRE  
7  
8 Questionnaire can be adapted to Chinese cultures, which had excellent content  
9  
10 validity and construct validity as well as high internal consistency reliability and  
11  
12 test-retest reliability among patients with breast cancer.  
13  
14

15  
16 Item analysis showed that correlation coefficients between the score of each  
17  
18 item and the total score of the questionnaire were both greater than 0.4, and the CR  
19  
20 value also was statistically significant, indicating suitability or reliability of items.  
21  
22

23  
24 Cronbach's  $\alpha$  coefficient for the total FaRE Questionnaire was 0.909 for the  
25  
26 including sample, and Cronbach's  $\alpha$  coefficients of four factors were respectively 0.90,  
27  
28 0.932, 0.905, 0.963, indicating high internal consistency reliability of the Chinese  
29  
30 version of FaRE Questionnaire. This finding was higher than Cronbach's  $\alpha$  for the  
31  
32 Italian population<sup>[18]</sup>. The Chinese version of the FaRE Questionnaire also had a high  
33  
34 test-retest reliability, indicating good time stability in breast cancer patients.  
35  
36  
37  
38

39  
40 Results of our study shown that the FaRE Questionnaire had a good content  
41  
42 validity, indicating that the questionnaire can accurately reflect the family resilience  
43  
44 of patients with breast cancer. Exploratory factor analysis and confirmatory factor  
45  
46 analysis were conducted on the large-scale samples to examine the construct validity.  
47  
48 For exploratory factor analysis, the analyses results indicated that all the items had  
49  
50 factor loading  $>0.476$ , meeting the criterion for significance. For confirmatory factor  
51  
52 analysis, the results indicated a four-factor structure consistent with the original Italy  
53  
54 version. These indicated that the validity of the Chinese version of the FaRE  
55  
56  
57  
58  
59  
60

1  
2  
3  
4 Questionnaire was relatively stable and was consistent with the tabulation theory.  
5

6  
7 As a global public health problem threatening women' health, breast cancer has more  
8  
9 significant impacts on patients, their spouses, family members, conjugal relationships  
10  
11 and family function. Family resilience emphasizes how the family as a system can  
12  
13 cope with stress and adversity to help the family achieve good adjustment and  
14  
15 adaptation. It is imperative to pay attention to the family resilience of breast cancer  
16  
17 patients. The Chinese version of the FaRE questionnaire finally formed in this study  
18  
19 has been subjected to strict reliability and validity test. The preliminary results also  
20  
21 show that the questionnaire can scientifically and effectively evaluate the family  
22  
23 resilience of breast cancer patients in mainland China. The Chinese version of FaRE  
24  
25 questionnaire has satisfactory validity and reliability for use among patients with  
26  
27 breast cancer in mainland China. Further research can use the instrument to assess the  
28  
29 family resilience of breast cancer patients, and on this basis provide personalized and  
30  
31 scientific family resilience intervention. However, there are some limitations in the  
32  
33 study. Data should have been collected from family members as well, given the  
34  
35 questionnaire is not just aimed at patients. Content validity scores should have been  
36  
37 gathered for patients and family members as part of the expert panel. In addition, it  
38  
39 would have been beneficial to provide some evidence of construct validity, and future  
40  
41 studies are suggested to examine the convergent validity and evaluate of sensitivity of  
42  
43 4 factors.  
44  
45  
46  
47  
48  
49  
50  
51  
52

## 53 54 55 **Conclusions**

56  
57  
58 The results of this study suggest that the Chinese version of FaRE Questionnaire is a  
59  
60

1  
2  
3  
4 valid and reliable instrument. It can effectively assess the family resilience and  
5  
6 provide an instrument for future research.  
7

### 8 9 **Author affiliations**

10  
11 <sup>1</sup>School of Nursing and Health, Zhengzhou University, Zhengzhou ,China

12  
13  
14 <sup>2</sup>Zhengzhou Central Hospital Affiliated To Zhengzhou University, Zhengzhou, China

15  
16  
17 <sup>3</sup> College of Psychological Education (Based school), Zhengzhou University, Zhengzhou, China

18  
19  
20 <sup>4</sup> Experimental Center for Basic Medicine, Zhengzhou University, Zhengzhou, Henan, China.  
21

### 22 **Contributors**

23  
24 MML, RM and SFZ contributed to the conception, design and manuscript writing of the study,  
25  
26 revising the draft critically for important intellectual content. SSW, JWJ and LML contributed to  
27  
28 the questionnaire translation, data acquisition and interpretation of the outcomes. PPW and ZZZ  
29  
30 contributed to study supervision, project administration and funding acquisition. PW contributed  
31  
32 to the crucial revision of the manuscript for important intellectual content, provided final  
33  
34 confirmation of the revised version to be published.  
35  
36  
37  
38  
39

### 40 **Funding**

41  
42 This work was supported by the Innovative Talent Project of Colleges and Universities in Henan  
43  
44 Province grant number 20HASTIT047, Foundation of Co-constructing Project of Henan Province  
45  
46 and National Health Commission grant number SBGJ202002103, Project of Department of  
47  
48 Science and Technology of Henan Province grant number 202102310069, the Medical Education  
49  
50 Research Project of Henan Health Commission grant number Wjlx2020362, the Project of Social  
51  
52 Science Association in Henan Province grant number SKL-2021-472 and the Project of Social  
53  
54 Science Association in Henan Province grant number SKL-2021-476.  
55  
56  
57  
58  
59  
60



1  
2  
3  
4 **Competing interests** None declared.  
5

6 **Patient consent for publication** Parental/guardian consent obtained.  
7

8  
9 **Ethics approval**

10  
11 The Ethics Committee of Zhengzhou University has approved the study(ZZURIB 2020-19).  
12

13  
14 **Provenance and peer review** Not commissioned; externally peer reviewed.  
15

16  
17 **Data availability statement** Data are available on reasonable request.  
18

19 Contact:17839945811@163.com.  
20

21  
22 **Open access** This is an open access article distributed in accordance with the Creative Commons  
23  
24 Attribution Non Commercial (CC BY-NC 4.0) license, which permits others to distribute, remix,  
25  
26 adapt, build upon this work non-commercially, and license their derivative works on different  
27  
28 terms, provided the original work is properly cited, appropriate credit is given, any changes made  
29  
30 indicated, and the use is non-commercial. See: <http://creativecommons.org/licenses/by-nc/4.0/>.  
31  
32  
33

34  
35 **Declaration of conflicting interests**

36  
37 We have read and understood BMJ policy on declaration of interests and declare that we have no  
38  
39 competing interests.  
40  
41

42  
43 **REFERENCES**  
44

- 45 [dataset][1]Bray F, Ferlay J, Soerjomataram I, et al .Data from: Global cancer statistics 2018:  
46  
47 GLOBOCAN estimates of incidence and mortality worldwide for 36 cancers in 185 countries.  
48  
49 CA: a cancer journal for clinicians 2018; 68:394-24. doi:10.3322/caac.21492  
50  
51  
52  
53 2 Cardoso F, Kyriakides S, Ohno S, et al. Early breast cancer: ESMO Clinical Practice Guidelines  
54  
55 for diagnosis, treatment and follow-up. *Annals of Oncology* 2018; 30:1194-20.  
56  
57 doi:10.1093/annonc/mdz173  
58  
59  
60

- 1  
2  
3  
4 3 Alexander A, Kaluve R, Prabhu JS, et al. The Impact of Breast Cancer on the Patient and the  
5  
6 Family in Indian Perspective. *Indian Journal of Palliative Care* 2019; 25:66 – 2.  
7  
8  
9 doi:10.4103 /IJPC.IJPC\_158\_18  
10  
11 4 Haefner, J. An application of Bowen family systems theory. *Issues in Mental Health Nursing*  
12  
13 2014;35:835-41. doi:10.3109/01612840.2014.921257  
14  
15  
16 5 Rolland JS. Cancer and the family: An integrative model. *Cancer* 2005;104:2584-95. doi:10.  
17  
18 1002/cncr.21489  
19  
20  
21 6 Matzka M, Mayer H, Köck-H ó di S, et al. Relationship between Resilience, Psychological  
22  
23 Distress and Physical Activity in Cancer Patients: A Cross - Sectional Observation Study.  
24  
25 *PloS One* 2016;11:e0154496. doi:10.1371/journal.pone.0154496  
26  
27  
28 7 Milanti A, Metsala Eija, Hannula L. Reducing psychological distress in patients undergoing  
29  
30 chemotherapy. *British Journal of Nursing* (Mark Allen Publishing) 2016; 25:S25-30.  
31  
32  
33 doi:10.12968/bjon.2016.25.4.S25  
34  
35  
36 8 Tsang W, Chow LWC, Loo WTY, et al. Tai Chi Chuan enhances cytokine expression levels and  
37  
38 psychological factors in post-chemotherapy breast cancer patients. *European Journal of*  
39  
40 *Cancer & Clinical Onology* 2015;51:e30.  
41  
42  
43  
44 9 An Y, Fu G, Yuan, G. Quality of Life in Patients With Breast Cancer: The Influence of Family  
45  
46 Caregiver's Burden and the Mediation of Patient's Anxiety and Depression. *The Journal of*  
47  
48 *Nervous and Mental Disease* 2019;207:921 – 26. doi:10.1097/NMD.0000000000001040  
49  
50  
51  
52 10 Fang CY, Manne, SL, Pape SJ. Functional impairment, marital quality, and patient  
53  
54 psychological distress as predictors of psychological distress among cancer patients '  
55  
56 spouses. *Health Psychology* 2001;20:452-57.  
57  
58  
59  
60

- 1  
2  
3  
4 11 Stenberg U, Ruland CM, Miaskowski C. Review of the literature on the effects of caring for a  
5  
6 patient with cancer. *Psycho-Oncology* 2010;19:1013 – 25. doi:10.1002/pon.1670  
7  
8  
9 12 Agbeko AE, Arthur J, Bayuo J, et al. Seeking healthcare at their ‘right’ time; the iterative  
10  
11 decision process for women with breast cancer. *BMC Cancer* 2020;20:1011.doi: 10.1186/s  
12  
13 12885-020-07520-x  
14  
15  
16 13 Zhang L, Yu R, Zheng QH, et al. Study on relationship model between stigma, family function  
17  
18 of breast cancer patients. *Nursing Research* 2017;31:1333-36.  
19  
20  
21 14 Chen CM, Yang YU, Wang YJ, et al. Features and Effects of Family Function in Postoperative  
22  
23 Breast Cancer Patients under Chemotherapy in a Hospital, Zhejiang. *Medicine and Society*  
24  
25 2014; 27:81-3.  
26  
27  
28 15 Ginter AC, Radina ME. “I Was There With Her” : Experiences of Mothers of Women With  
29  
30 Breast Cancer. *Journal of Family Nursing* 2019;25:54 – 80. doi:10.1177/1074840718816745  
31  
32  
33 16 Wang WH, Jiang Z, Yang Z. Family Resilience: Concept and Application in Families with a  
34  
35 Cancer Patient(review). *Chinese Journal of Rehabilitation Theory and Practice* 2015;21:  
36  
37 534-38.  
38  
39  
40 17 Inhestern L, Bergelt C. When a mother has cancer: strains and resources of affected families  
41  
42 from the mother’ s and father’ s perspective-a qualitative study. *BMC Women’ s Health*  
43  
44 2018;18:72. doi:10.1186/s12905-018-0562-8  
45  
46  
47 18 Nie ZH, LIU JE, Su YL, et al. A randomized controlled study of spousal communication  
48  
49 intervention in breast cancer patients. *Chinese Nursing Management* 2019;19:682-87.  
50  
51  
52 [dataset][19]Faccio F, Gandini S, Renzi C, et al. **Data from:**Development and validation of the  
53  
54 Family Resilience (FaRE) Questionnaire: an observational study in Italy. *BMJ Open*  
55  
56  
57  
58  
59  
60

2019;9:e024670. doi:10.1136/bmjopen-2018-024670

[dataset][20]Boomsma A. Data from:The robustness of LISREL against small sample sizes in factor analysis models[J]. Systems under indirect observation: Causality, structure, prediction, 1982, 1: 149-173.

21 Brislin RW. Back-translation for cross-cultural research. Journal of Cross-Cultural Psychology 1970;1:185-16.

[dataset][22]Wu ML. Data from:Questionnaire statistical analysis practice. Operation and Application of SPSS. Chongqing: Chongqing University Press, 2010.

[dataset][23]Polit DF, Beck CT. Data from:The content validity index: are you sure you know what ' s being reported? Critique and recommendations. Research in Nursing & Health 2006;29:489 - 97. doi: 10.1002/nur.20147

24 Martin JS, Vincenzi C, Spirig R. Principles and methods of good practice for the translation process for instruments of nursing research and nursing practice. Pflege 2007;20:157-63.doi: 10.1024/1012-5302.20.3.157

25 Wang ZX, Liu JE, Chen SQ. The research progress of family adjustment and adaptation for breast cancer patients. Chinese Nursing Management 2016;16:195-98.

## Figure legends

**Figure 1 Fitting figure of default model of Chinese version of FaRE Questionnaire**

**Figure 2 Fitting figure of modification model of the Chinese version of FaRE Questionnaire**

1  
2  
3  
4  
5  
6  
7  
8  
9  
10  
11  
12  
13  
14  
15  
16  
17  
18  
19  
20  
21  
22  
23  
24  
25  
26  
27  
28  
29  
30  
31  
32  
33  
34  
35  
36  
37  
38  
39  
40  
41  
42  
43  
44  
45  
46  
47  
48  
49  
50  
51  
52  
53  
54  
55  
56  
57  
58  
59  
60

For peer review only

1  
2  
3  
4  
5  
6  
7  
8  
9  
10  
11  
12  
13  
14  
15  
16  
17  
18  
19  
20  
21  
22  
23  
24  
25  
26  
27  
28  
29  
30  
31  
32  
33  
34  
35  
36  
37  
38  
39  
40  
41  
42  
43  
44  
45  
46  
47  
48  
49  
50  
51  
52  
53  
54  
55  
56  
57  
58  
59  
60

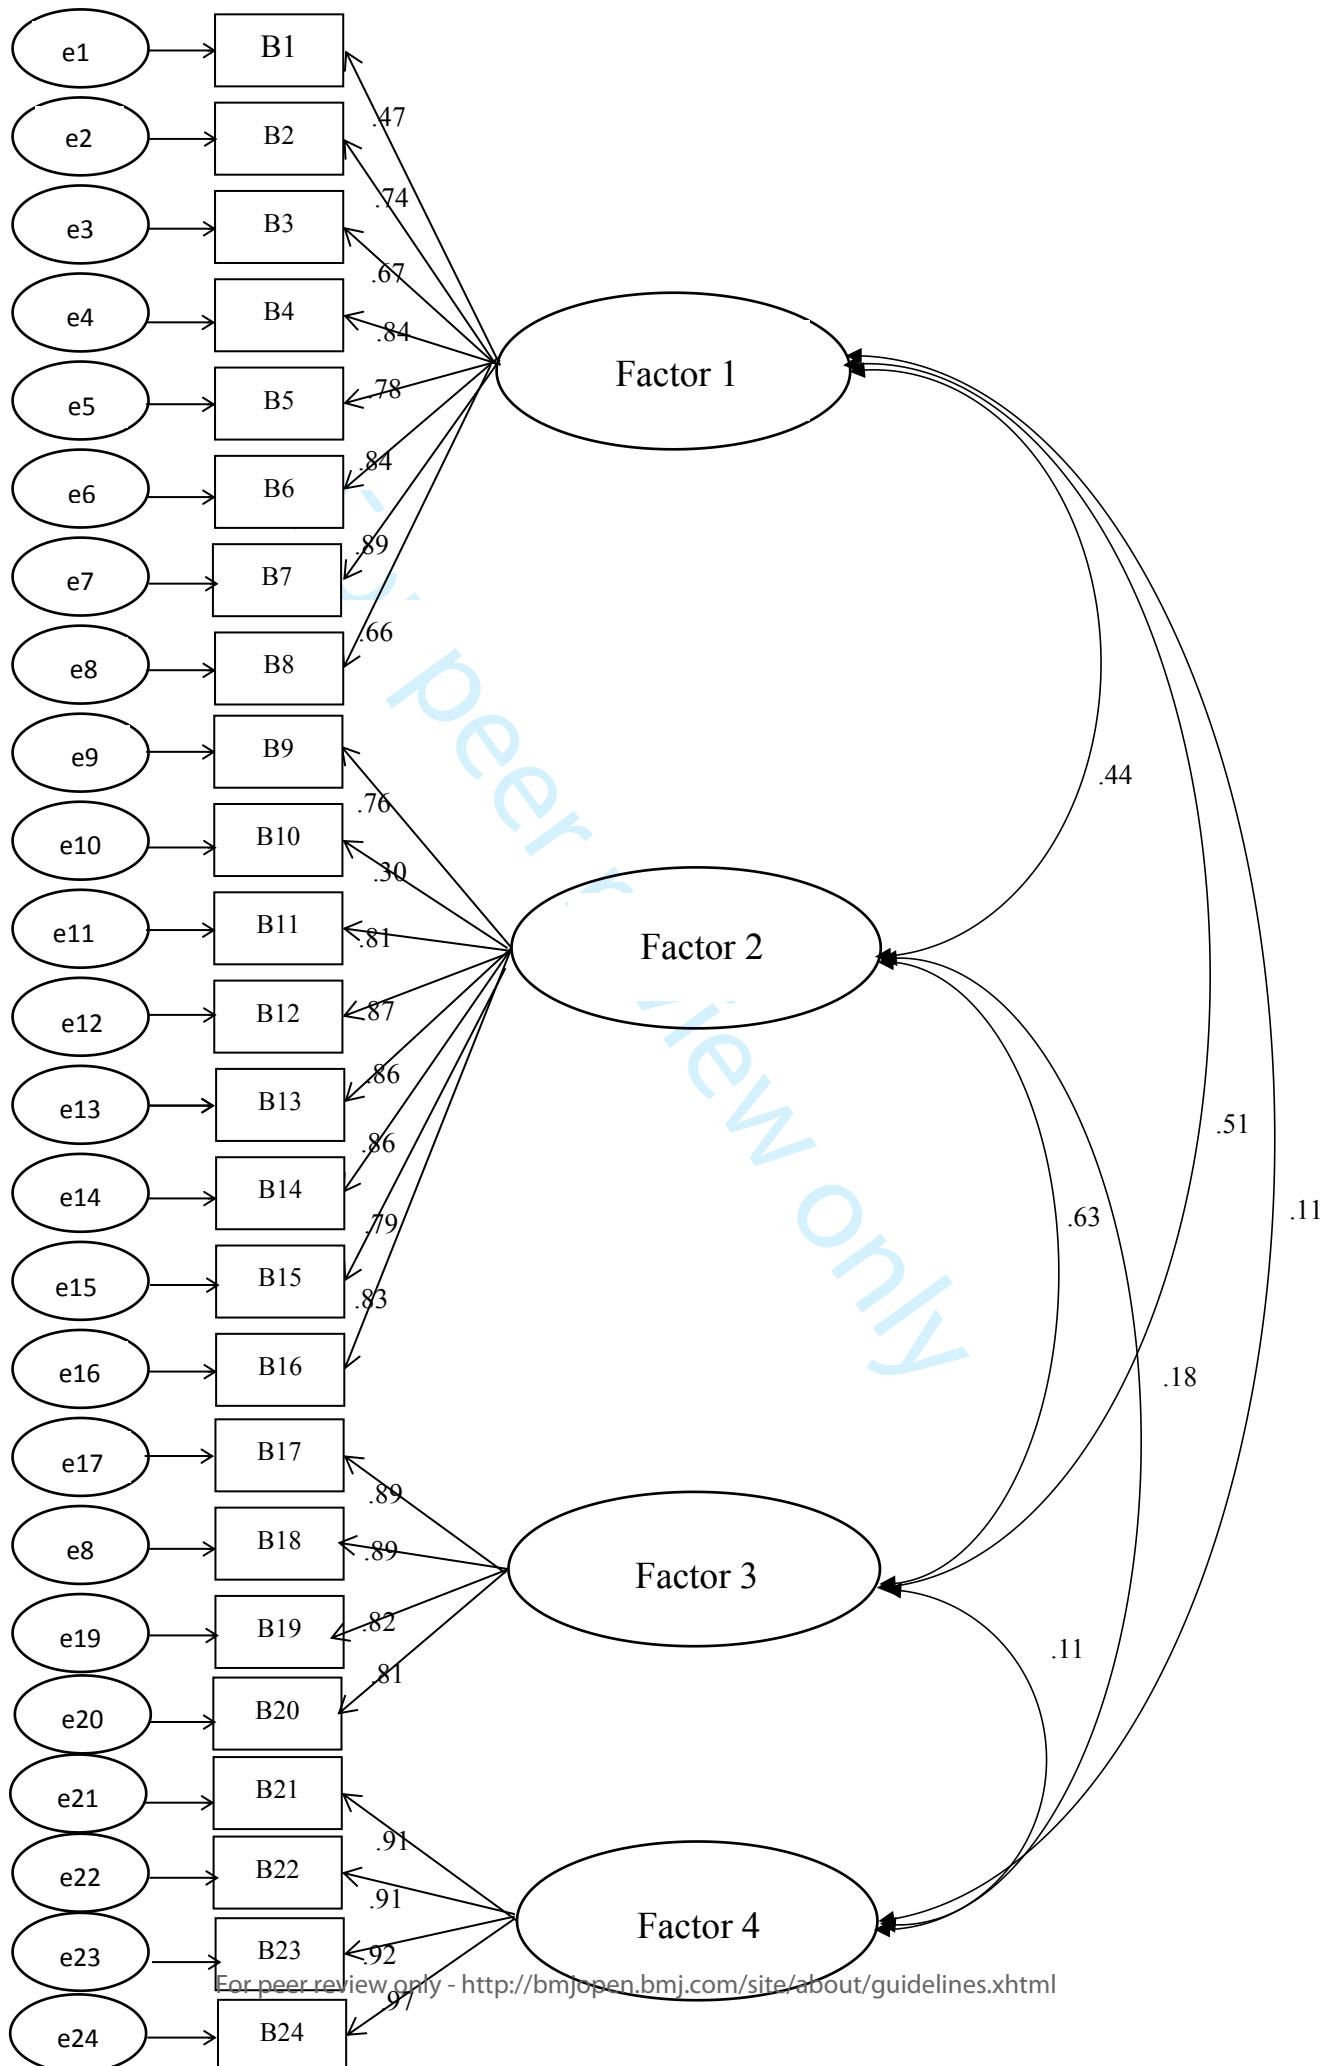



## STROBE Statement—checklist of items that should be included in reports of observational studies

|                              | Item No | Recommendation                                                                                                                                                                                                                                                                                                                                                                                                                                                                                                                                                                                                                                                                                                                      |
|------------------------------|---------|-------------------------------------------------------------------------------------------------------------------------------------------------------------------------------------------------------------------------------------------------------------------------------------------------------------------------------------------------------------------------------------------------------------------------------------------------------------------------------------------------------------------------------------------------------------------------------------------------------------------------------------------------------------------------------------------------------------------------------------|
| <b>Title and abstract</b>    | 1       | (a) Indicate the study's design with a commonly used term in the title or the abstract<br><i>yes✓ page 2 in clean copy</i><br>(b) Provide in the abstract an informative and balanced summary of what was done and what was found <i>yes✓ page 2-3 in clean copy</i>                                                                                                                                                                                                                                                                                                                                                                                                                                                                |
| <b>Introduction</b>          |         |                                                                                                                                                                                                                                                                                                                                                                                                                                                                                                                                                                                                                                                                                                                                     |
| Background/rationale         | 2       | Explain the scientific background and rationale for the investigation being reported<br><i>yes✓ page 3-5 in clean copy</i>                                                                                                                                                                                                                                                                                                                                                                                                                                                                                                                                                                                                          |
| Objectives                   | 3       | State specific objectives, including any prespecified hypotheses <i>yes✓ page 5 in clean copy</i>                                                                                                                                                                                                                                                                                                                                                                                                                                                                                                                                                                                                                                   |
| <b>Methods</b>               |         |                                                                                                                                                                                                                                                                                                                                                                                                                                                                                                                                                                                                                                                                                                                                     |
| Study design                 | 4       | Present key elements of study design early in the paper <i>yes✓ page 5 in clean copy</i>                                                                                                                                                                                                                                                                                                                                                                                                                                                                                                                                                                                                                                            |
| Setting                      | 5       | Describe the setting, locations, and relevant dates, including periods of recruitment, exposure, follow-up, and data collection <i>yes✓ page 5-6 in clean copy, page 8(data collection ) in clean copy</i>                                                                                                                                                                                                                                                                                                                                                                                                                                                                                                                          |
| Participants                 | 6       | (a) <i>Cohort study</i> —Give the eligibility criteria, and the sources and methods of selection of participants. Describe methods of follow-up<br><i>Case-control study</i> —Give the eligibility criteria, and the sources and methods of case ascertainment and control selection. Give the rationale for the choice of cases and controls<br><i>Cross-sectional study</i> —Give the eligibility criteria, and the sources and methods of selection of participants <i>yes✓ page 5-6 in clean copy</i><br>(b) <i>Cohort study</i> —For matched studies, give matching criteria and number of exposed and unexposed<br><i>Case-control study</i> —For matched studies, give matching criteria and the number of controls per case |
| Variables                    | 7       | Clearly define all outcomes, exposures, predictors, potential confounders, and effect modifiers. Give diagnostic criteria, if applicable <i>yes✓ page 9-11 in clean copy</i>                                                                                                                                                                                                                                                                                                                                                                                                                                                                                                                                                        |
| Data sources/<br>measurement | 8*      | For each variable of interest, give sources of data and details of methods of assessment (measurement). Describe comparability of assessment methods if there is more than one group <i>yes✓ page 6-7 in clean copy</i>                                                                                                                                                                                                                                                                                                                                                                                                                                                                                                             |
| Bias                         | 9       | Describe any efforts to address potential sources of bias                                                                                                                                                                                                                                                                                                                                                                                                                                                                                                                                                                                                                                                                           |
| Study size                   | 10      | Explain how the study size was arrived at <i>yes✓ page 6 in clean copy</i>                                                                                                                                                                                                                                                                                                                                                                                                                                                                                                                                                                                                                                                          |
| Quantitative variables       | 11      | Explain how quantitative variables were handled in the analyses. If applicable, describe which groupings were chosen and why <i>yes✓</i>                                                                                                                                                                                                                                                                                                                                                                                                                                                                                                                                                                                            |
| Statistical methods          | 12      | (a) Describe all statistical methods, including those used to control for confounding <i>yes✓ page 9-11 in clean copy</i><br>(b) Describe any methods used to examine subgroups and interactions<br>(c) Explain how missing data were addressed<br>(d) <i>Cohort study</i> —If applicable, explain how loss to follow-up was addressed<br><i>Case-control study</i> —If applicable, explain how matching of cases and controls was addressed<br><i>Cross-sectional study</i> —If applicable, describe analytical methods taking account of sampling strategy <i>yes✓ page 6 in clean copy</i><br>(e) Describe any sensitivity analyses                                                                                              |

Continued on next page



| <b>Results</b>           |     |                                                                                                                                                                                                                                                                                                                                                                                                                                                    |
|--------------------------|-----|----------------------------------------------------------------------------------------------------------------------------------------------------------------------------------------------------------------------------------------------------------------------------------------------------------------------------------------------------------------------------------------------------------------------------------------------------|
| Participants             | 13* | (a) Report numbers of individuals at each stage of study—eg numbers potentially eligible, examined for eligibility, confirmed eligible, included in the study, completing follow-up, and analysed <b>yes✓ page 6 in clean copy</b><br>(b) Give reasons for non-participation at each stage<br>(c) Consider use of a flow diagram                                                                                                                   |
| Descriptive data         | 14* | (a) Give characteristics of study participants (eg demographic, clinical, social) and information on exposures and potential confounders <b>yes✓ page 11-12 in clean copy</b><br>(b) Indicate number of participants with missing data for each variable of interest<br>(c) <i>Cohort study</i> —Summarise follow-up time (eg, average and total amount)                                                                                           |
| Outcome data             | 15* | <i>Cohort study</i> —Report numbers of outcome events or summary measures over time<br><i>Case-control study</i> —Report numbers in each exposure category, or summary measures of exposure<br><i>Cross-sectional study</i> —Report numbers of outcome events or summary measures <b>yes✓ page 9-11 in clean copy</b>                                                                                                                              |
| Main results             | 16  | (a) Give unadjusted estimates and, if applicable, confounder-adjusted estimates and their precision (eg, 95% confidence interval). Make clear which confounders were adjusted for and why they were included <b>yes✓ page 11-16 in clean copy</b><br>(b) Report category boundaries when continuous variables were categorized<br>(c) If relevant, consider translating estimates of relative risk into absolute risk for a meaningful time period |
| Other analyses           | 17  | Report other analyses done—eg analyses of subgroups and interactions, and sensitivity analyses                                                                                                                                                                                                                                                                                                                                                     |
| <b>Discussion</b>        |     |                                                                                                                                                                                                                                                                                                                                                                                                                                                    |
| Key results              | 18  | Summarise key results with reference to study objective <b>yes✓ page 17-19 in clean copy</b>                                                                                                                                                                                                                                                                                                                                                       |
| Limitations              | 19  | Discuss limitations of the study, taking into account sources of potential bias or imprecision. Discuss both direction and magnitude of any potential bias <b>yes✓ page 19 in clean copy</b>                                                                                                                                                                                                                                                       |
| Interpretation           | 20  | Give a cautious overall interpretation of results considering objectives, limitations, multiplicity of analyses, results from similar studies, and other relevant evidence <b>yes✓ page 19 in clean copy</b>                                                                                                                                                                                                                                       |
| Generalisability         | 21  | Discuss the generalisability (external validity) of the study results                                                                                                                                                                                                                                                                                                                                                                              |
| <b>Other information</b> |     |                                                                                                                                                                                                                                                                                                                                                                                                                                                    |
| Funding                  | 22  | Give the source of funding and the role of the funders for the present study and, if applicable, for the original study on which the present article is based <b>yes✓ page 20 in clean copy</b>                                                                                                                                                                                                                                                    |

\*Give information separately for cases and controls in case-control studies and, if applicable, for exposed and unexposed groups in cohort and cross-sectional studies.

**Note:** An Explanation and Elaboration article discusses each checklist item and gives methodological background and published examples of transparent reporting. The STROBE checklist is best used in conjunction with this article (freely available on the Web sites of PLoS Medicine at <http://www.plosmedicine.org/>, Annals of Internal Medicine at <http://www.annals.org/>, and Epidemiology at <http://www.epidem.com/>). Information on the STROBE Initiative is available at [www.strobe-statement.org](http://www.strobe-statement.org).

# BMJ Open

## Reliability and validity of the Chinese version of the Family Resilience Questionnaire (FaRE Questionnaire) in patients with breast cancer: a cross-sectional study

|                                 |                                                                                                                                                                                                                                                                                                                                                                                                                                                                                                                                                                                                                                                                                                                                          |
|---------------------------------|------------------------------------------------------------------------------------------------------------------------------------------------------------------------------------------------------------------------------------------------------------------------------------------------------------------------------------------------------------------------------------------------------------------------------------------------------------------------------------------------------------------------------------------------------------------------------------------------------------------------------------------------------------------------------------------------------------------------------------------|
| Journal:                        | <i>BMJ Open</i>                                                                                                                                                                                                                                                                                                                                                                                                                                                                                                                                                                                                                                                                                                                          |
| Manuscript ID                   | bmjopen-2021-051093.R2                                                                                                                                                                                                                                                                                                                                                                                                                                                                                                                                                                                                                                                                                                                   |
| Article Type:                   | Original research                                                                                                                                                                                                                                                                                                                                                                                                                                                                                                                                                                                                                                                                                                                        |
| Date Submitted by the Author:   | 26-Feb-2022                                                                                                                                                                                                                                                                                                                                                                                                                                                                                                                                                                                                                                                                                                                              |
| Complete List of Authors:       | li, mengmeng; Zhengzhou University, School of Nursing and Health; Zhengzhou Central Hospital Affiliated To Zhengzhou University<br>Ma, Rui; Zhengzhou University, College of Psychological Education (Based school)<br>ZHANG, Shanfeng; Zhengzhou University, Experimental Center for Basic Medicine<br>Wang, Shan-shan; Zhengzhou University<br>jiao, jiawei; Zhengzhou University, School of Nursing and Health<br>LIU, Lamei; Zhengzhou University, School of Nursing and Health<br>WANG, Panpan; Zhengzhou University, School of Nursing and Health<br>Zhang, Zhen-xiang; Zhengzhou University, School of Nursing and Health<br>Wang, Peng; Zhengzhou University, School of Nursing and Health<br>Li, Xiaoyan ; Zhengzhou University |
| <b>Primary Subject Heading</b>: | Nursing                                                                                                                                                                                                                                                                                                                                                                                                                                                                                                                                                                                                                                                                                                                                  |
| Secondary Subject Heading:      | Nursing, Health services research, Oncology                                                                                                                                                                                                                                                                                                                                                                                                                                                                                                                                                                                                                                                                                              |
| Keywords:                       | ONCOLOGY, PSYCHIATRY, Health policy < HEALTH SERVICES ADMINISTRATION & MANAGEMENT                                                                                                                                                                                                                                                                                                                                                                                                                                                                                                                                                                                                                                                        |
|                                 |                                                                                                                                                                                                                                                                                                                                                                                                                                                                                                                                                                                                                                                                                                                                          |

SCHOLARONE™  
Manuscripts

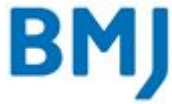

I, the Submitting Author has the right to grant and does grant on behalf of all authors of the Work (as defined in the below author licence), an exclusive licence and/or a non-exclusive licence for contributions from authors who are: i) UK Crown employees; ii) where BMJ has agreed a CC-BY licence shall apply, and/or iii) in accordance with the terms applicable for US Federal Government officers or employees acting as part of their official duties; on a worldwide, perpetual, irrevocable, royalty-free basis to BMJ Publishing Group Ltd ("BMJ") its licensees and where the relevant Journal is co-owned by BMJ to the co-owners of the Journal, to publish the Work in this journal and any other BMJ products and to exploit all rights, as set out in our [licence](#).

The Submitting Author accepts and understands that any supply made under these terms is made by BMJ to the Submitting Author unless you are acting as an employee on behalf of your employer or a postgraduate student of an affiliated institution which is paying any applicable article publishing charge ("APC") for Open Access articles. Where the Submitting Author wishes to make the Work available on an Open Access basis (and intends to pay the relevant APC), the terms of reuse of such Open Access shall be governed by a Creative Commons licence – details of these licences and which [Creative Commons](#) licence will apply to this Work are set out in our licence referred to above.

Other than as permitted in any relevant BMJ Author's Self Archiving Policies, I confirm this Work has not been accepted for publication elsewhere, is not being considered for publication elsewhere and does not duplicate material already published. I confirm all authors consent to publication of this Work and authorise the granting of this licence.

## Title page

**Title:** Reliability and validity of the Chinese version of the Family Resilience Questionnaire (FaRE Questionnaire) in patients with breast cancer: a cross-sectional study

**Author:** Mengmeng Li<sup>1,2#</sup>, Rui Ma<sup>3#</sup>, Shanfeng Zhang<sup>4#</sup>, Shanshan Wang<sup>1</sup>, Jiawei Jiao<sup>1</sup>, Lamei Liu<sup>1</sup>, Panpan Wang<sup>1</sup>, Zhenxiang Zhang<sup>1</sup>, Peng Wang<sup>1,5\*</sup>, Xiaoyan Li<sup>2\*</sup>

### Corresponding author:

1. Professor Dr Peng Wang, School of Nursing and Health, Zhengzhou University, Zhengzhou 450001/Department of Pharmacology, Medical School of Huanghe Science and Technology University, Zhengzhou 450006, China, [upliz@zzu.edu.cn](mailto:upliz@zzu.edu.cn), 13653815021, 0371-86565001;

2. Associate professor of nursing Xiaoyan Li, Zhengzhou Central Hospital Affiliated To Zhengzhou University, Zhengzhou, China, [1475919311@qq.com](mailto:1475919311@qq.com), 13503848308, 0371-67690399.

**Mengmeng Li**, School of Nursing and Health, Zhengzhou University, Zhengzhou, China; Zhengzhou Central Hospital Affiliated To Zhengzhou University, Zhengzhou, China.

**Rui Ma**, College of Psychological Education (Based school), Zhengzhou University, Zhengzhou, China.

**Shanfeng Zhang**, Experimental Center for Basic Medicine, Zhengzhou University, Zhengzhou, Henan, China.

**Shanshan Wang**, School of Nursing and Health, Zhengzhou University, Zhengzhou, China.

**Jiawei Jiao**, School of Nursing and Health, Zhengzhou University, Zhengzhou, China.

**Lamei Liu**, School of Nursing and Health, Zhengzhou University, Zhengzhou, China.

**Panpan Wang**, School of Nursing and Health, Zhengzhou University, Zhengzhou, China.

1  
2  
3 **Zhenxiang Zhang**, School of Nursing and Health, Zhengzhou University, Zhengzhou, China.  
4

5  
6 **Peng Wang**, School of Nursing and Health, Zhengzhou University, Zhengzhou, China;  
7  
8 Department of Pharmacology, Medical School of Huanghe Science and Technology University,  
9  
10 Zhengzhou, China.  
11

12  
13  
14 **Xiaoyan Li**, Zhengzhou Central Hospital Affiliated To Zhengzhou University, Zhengzhou, China.  
15

16 **Keywords:** breast cancer; family resilience; nursing; healthcare  
17

18  
19 **Word count:** 5969  
20

21 **Reliability and validity of the Chinese version of the Family Resilience**  
22 **Questionnaire (FaRE Questionnaire) in patients with breast cancer: a**  
23 **cross-sectional study**  
24  
25  
26  
27

28  
29 **ABSTRACT**  
30

31  
32 **Objective** The aim of this study was to assess the reliability and validity of the Chinese version of  
33  
34 the Family Resilience Questionnaire among patients with breast cancer in China.  
35

36  
37 **Design** It was a cross-sectional study, which involved translation, back-translation, cultural  
38  
39 adjustment, and psychometric testing of a 24-item family resilience questionnaire.  
40

41  
42 **Setting** Three tertiary hospitals in Zhengzhou, China. Respectively are the First Affiliated  
43  
44 Hospital of Zhengzhou University, Second Hospital Affiliated to Zhengzhou University,  
45  
46 Henan provincial people's hospital.  
47

48  
49 **Participants** A total of 559 patients with breast cancer volunteered to participate in the study  
50

51  
52 **Primary outcome measures** Data analysis was performed using the IBM SPSS software  
53  
54 version 21.0 and AMOS software version 21.0. Cronbach's  $\alpha$  coefficient was used to  
55  
56 examine the internal consistency. The test-retest reliability was calculated using the intraclass  
57  
58  
59  
60

1  
2  
3 correlation coefficient on 30 participants. The content validity index was calculated based on the  
4  
5  
6 values obtained from six expert opinions. Construct validity test was performed using factor  
7  
8  
9 analysis including exploratory factor analysis and confirmatory factor analysis.

10  
11 **Results** For the Chinese version of FaRE questionnaire, the Cronbach's  $\alpha$  coefficient of the total  
12  
13 questionnaire was 0.909, and Cronbach's  $\alpha$  coefficients of four factors were 0.902, 0.932, 0.905,  
14  
15 0.963 respectively. The test-retest reliability index of the total questionnaire was 0.905. The  
16  
17 Scale-Content Validity Index (S-CVI) was 0.97, and Item-Content Validity Index (I-CVI) ranged  
18  
19 from 0.83 to 1.00. The questionnaire included 24 items, exploratory factor analysis extracted four  
20  
21 factors with loading  $> 0.4$ , which could explain 72.146% of the total variance. Confirmatory factor  
22  
23 analysis showed the Chinese version of FaRE questionnaire had an excellent four-factor model  
24  
25 consistent with the original questionnaire.  
26  
27  
28  
29  
30  
31

32 **Conclusion** The Chinese version of FaRE Questionnaire has acceptable reliability and validity  
33  
34 among patients with breast cancer in China. It can effectively assess family resilience and provide  
35  
36 basis for personalized family resilience interventions for patients with breast cancer.  
37  
38  
39

#### 40 **Strengths and limitations of this study**

41  
42 **►** This is the first study to describe the translation and cultural and of the FaRE  
43  
44 Questionnaire, and to explore its psychometric relevance in patients for breast cancer  
45  
46 in China.  
47  
48

49 **►** The study had sufficient sample size with precise statistics methods.  
50  
51

52 **►** The findings of our study were only based on data from patients from three  
53  
54 hospitals in Zhengzhou, which may not be representative of patients with breast  
55  
56 cancer in mainland China.  
57  
58  
59  
60

1  
2  
3  
4 ▶ Convergent validity assessment and evaluation of sensitivity of 4 factors will be  
5  
6 considered in future research.  
7

## 8 9 **Introduction**

10  
11 Breast cancer had the highest incidence in new cancer cases, whose morbidity  
12  
13 and mortality was respectively 24.2%, 15.0% in women and topped the list  
14  
15 according to the latest global cancer statistics in 2018<sup>[1]</sup>. Breast cancer ranks fifth  
16  
17 among malignant tumors in China, and breast cancer ranks first among malignant  
18  
19 tumors in women. Although the development of medical technology makes the  
20  
21 survival time of patients with breast cancer significantly prolong<sup>[2]</sup>, diagnosis of  
22  
23 breast cancer, mastectomy and long-term postoperative chemoradiotherapy also  
24  
25 inevitably lead to severe adverse stress reactions. Meanwhile, breast cancer is not just  
26  
27 a personal event. It is also a more critical family event<sup>[3]</sup>. According to  
28  
29 Bowen family systems theory<sup>[4]</sup>, cancer diagnosis and related clinical treatment of a  
30  
31 family member may cause patients and their families to be in a state of adverse and  
32  
33 high stress, and ultimately affect the stability and balance of the whole family  
34  
35 system<sup>[5]</sup>. Previous studies on family stress of patients with breast cancer mainly  
36  
37 focused on two aspects, which were both negative. On the one hand, the studies  
38  
39 mainly paid attention to negative emotions of patients with breast cancer such as  
40  
41 anxiety, pessimism, fear<sup>[6-7]</sup> and depression<sup>[8]</sup> and descending quality of life<sup>[9]</sup> and  
42  
43 their family members' psychological distress<sup>[10]</sup>, physical burden<sup>[11]</sup>, psychosocial  
44  
45 burden and economic burden<sup>[12]</sup>. On the other hand, the studies focused on a variety  
46  
47 of adverse family stress reactions including family dysfunction<sup>[13-14]</sup> and reduced  
48  
49  
50  
51  
52  
53  
54  
55  
56  
57  
58  
59  
60

1  
2  
3 family life quality of patients with breast cancer<sup>[15]</sup>.  
4  
5

6 With the proposing of family systems theory and the rising of positive  
7  
8 psychology, while discussing the negative impact of cancer on the whole family,  
9  
10 domestic and foreign scholars also found that families of cancer patients have positive  
11  
12 resilience<sup>[16]</sup>. Positive psychology is a new science that studies traditional psychology  
13  
14 from a positive perspective. It adopts scientific principles and methods to study  
15  
16 happiness, advocates the positive orientation of psychology, studies the positive  
17  
18 psychological quality of human beings, pays attention to the health, happiness and  
19  
20 harmonious development of human beings. Current Researches showed that the focus  
21  
22 of research on family stress of cancer patients has gradually shifted to the strength and  
23  
24 power of family, namely, family resilience. It has been widely used in psychology and  
25  
26 nursing<sup>[17]</sup>. Family resilience is defined as an attribute that helps families face changes,  
27  
28 overcome adversity and adapt to the risk. Strong family resilience can not only  
29  
30 improve the physical and mental health of patients and their family members but also  
31  
32 maintain healthy family functions. It ultimately promote a virtuous cycle of family  
33  
34 functions<sup>[18]</sup>. At the same time, compared with other types of cancer, breast cancer has  
35  
36 more significant impacts on patients, their spouses, family members, conjugal  
37  
38 relationships and family function<sup>[18]</sup>. Thus, for breast cancer patients, family resilience  
39  
40 may provide a new theoretical basis for interventions to maintain healthy family  
41  
42 functions. Therefore it is vital to assess the family resilience of patients with breast  
43  
44 cancer accurately.  
45  
46  
47  
48  
49  
50  
51  
52  
53  
54  
55  
56

57  
58 However, domestic research on family resilience of patients with breast cancer in  
59  
60



1  
2  
3 China is less. Now there is still a lack of effective family resilience assessment tools.  
4  
5  
6 Family Resilience Questionnaire was compiled based on Walsh Family Resilience  
7  
8 Model by Italian scholar Faccio et al<sup>[19]</sup>. It includes 24 items and four dimensions:  
9  
10 communication and cohesion, perceived social support, perceived family coping,  
11  
12 religiousness and spirituality. The FaRE Questionnaire is used to measure family  
13  
14 resilience, more specifically, the family dynamics and resources and estimating the  
15  
16 adaptation flexibility to cancer disease. The questionnaire has been tested in patients  
17  
18 with breast cancer in Italy and has good reliability and validity<sup>[19]</sup>. Therefore, the  
19  
20 purpose of this study was to provide a validated tool for assessing family resilience in  
21  
22 Chinese breast cancer patients through translation and psychometric testing of FaRE  
23  
24 questionnaire.  
25  
26  
27  
28  
29  
30

## 31 **Methods**

### 32 **Study Design**

33  
34  
35 The study is a cross-sectional study. The study was approved by the Ethics  
36  
37 Committee of Zhengzhou University (ZZURIB 2020-19). All patients volunteered to  
38  
39 participate  
40  
41  
42 in the study and provided informed written consent. In the study, patients with breast  
43  
44 cancer were recruited from three hospitals in Zhengzhou from December 2019 to  
45  
46 February 2020 and From August 2020 to September 2020. The inclusion criteria of  
47  
48 breast cancer were as follows: (1) histopathological examination confirms breast  
49  
50 cancer; (2) aged 18 years or older; (3) able to read and write Chinese; (4) informed  
51  
52 consent and voluntary participation in the study. The exclusion criteria were as  
53  
54  
55  
56  
57  
58  
59  
60

1  
2  
3 follows: (1) sufferers with mental disorders and communication difficulties; (2) no  
4  
5  
6 history of other serious life-threatening diseases.  
7

8  
9 Data were collected in two sampling sessions. The first sampling was used for  
10  
11 item analysis, exploratory factor analysis, and internal consistency. The sample size  
12  
13 should be at least 5 to 10 times that of the questionnaire items<sup>[20]</sup>, our Questionnaire  
14  
15 contains 24 items. The study's sample size was calculated as 8 times of the items, and  
16  
17 the sample loss rate of 15% was taken into account. Therefore, the required sample  
18  
19 size was 221 cases. Actually, two hundred and forty-nine valid questionnaires were  
20  
21 collected in this section finally. In addition, clinical data from a subgroup of 30  
22  
23 patients from different age groups were collected again for two week after the initial  
24  
25 collection to assess the test-retest reliability of the FaRE questionnaire. The second  
26  
27 sampling was used for confirmatory factor analysis. It is generally believed that the  
28  
29 sample size required for confirmatory factor analysis should not be less than 300  
30  
31 cases<sup>[20]</sup>, 310 cases of valid questionnaires were collected finally.  
32  
33  
34  
35  
36  
37  
38  
39

#### 40 **Measurements**

41  
42 Demographic characteristics and clinical data about family resilience were collected  
43  
44 using the General Information Questionnaire, the Chinese version of the Family  
45  
46 Resilience Questionnaire.  
47  
48

49  
50 **General Information Questionnaire.** The sociodemographic characteristics of the  
51  
52 participants were collected by General Information Questionnaire. The questionnaire  
53  
54 include some questions on age, religious faith, marital status, education, occupation,  
55  
56 Household per capita monthly income, Long-term residence, primary caregiver,  
57  
58  
59  
60

1  
2  
3 living situation, payment manner of the medical expenses, treatment of disease,  
4  
5  
6 surgery way, complication, family history of the disease.  
7

8 **The Chinese version of the Family Resilience Questionnaire.** The questionnaire  
9  
10 was developed by Faccio in 2019 according to the Walsh Family Resilience Model  
11  
12 based on breast cancer and prostate cancer patients<sup>[19]</sup>. It comprises 24 items, and four  
13  
14 dimensions: communication and cohesion(8 items), perceived social support(8 items),  
15  
16 perceived family coping(4 items), religiousness and spirituality(4 items). The  
17  
18 Cronbach's  $\alpha$  coefficients of four dimensions were 0.88, 0.88, 0.82 and 0.86  
19  
20 respectively in the original questionnaire, and it had good reliability and validity.  
21  
22 Questionnaire respondents indicate to what extent they agree with the items on a  
23  
24 seven-point scale method from 'strongly disagree' (scored 1) to 'strongly  
25  
26 agree'(scored 7). Adding score of each item in the FaRE Questionnaire together to get  
27  
28 total scores. Higher scores of the FaRE questionnaire reflect higher family resilience  
29  
30 levels.  
31  
32  
33  
34  
35  
36  
37  
38  
39

### 40 **Translation process**

41  
42 The original author Professor Faccio of FaRE questionnaire authorized the use of it.  
43  
44 Firstly, we translated the items of FaRE questionnaire into Chinese expressions and  
45  
46 adapted it cross-culturally using the Brislin translation pattern<sup>[20]</sup>. The translation  
47  
48 process was as follows<sup>[21]</sup>: (1) Forward translation: two translators, including a  
49  
50 bilingual graduate student and a bilingual Ph.D. student, independently translated the  
51  
52 English FaRE questionnaire into two different Chinese versions; (2) Proofreading:  
53  
54 Research group compared two different Chinese versions and made modifications and  
55  
56  
57  
58  
59  
60

1  
2  
3 adjustments to form a harmonized version; (3) Back translation: two graduate students  
4  
5 majored in English who didn't see the original English version of the questionnaire  
6  
7 independently translated FaRE questionnaire from Chinese into English. On the  
8  
9 premise of being faithful to the original questionnaire, researchers carried out forward  
10  
11 translation and back translation again by comparing the translated English  
12  
13 questionnaire with the original one to make consistent. (4) Cross-cultural adaptation:  
14  
15 Expert panel including two psychologists, two clinical medicine specialists, two  
16  
17 clinical nursing specialists independently reviewed the original, proofread and  
18  
19 translated version of the questionnaire to give their opinions on cultural equivalency  
20  
21 and the appropriateness of language translation. Moreover, they were asked to rate  
22  
23 each item on a four-point Likert type scale ranging from 1 (uncorrelated) to 4  
24  
25 (strongly correlated) so as to evaluate the content validity of the questionnaire. The  
26  
27 researchers will choose the most appropriate way of Chinese expression according to  
28  
29 the suggestions. (5) Pretest: 30 breast cancer patients were interviewed in-depth about  
30  
31 their understanding of the items, and the items with vague semantics and difficult to  
32  
33 understand were timely modified. (6) Combined with the results of expert  
34  
35 consultation and pretest, and form a final Chinese version of the Family Resilience  
36  
37 Questionnaire.  
38  
39  
40  
41  
42  
43  
44  
45  
46  
47  
48  
49

### 50 **Data collection**

51  
52 During the survey, researchers who received standardized training explained to  
53  
54 patients the purpose of the study and how to fill out the questionnaire in a uniform  
55  
56 training language. The General Information Questionnaire and the Chinese version of  
57  
58  
59  
60

1  
2  
3 the Family Resilience Questionnaire were administered to each breast cancer patient.  
4  
5

6 All patients were able to complete the questionnaires by themselves. Each survey took  
7  
8 about 15-20 minutes to complete.  
9

### 10 11 **Patient and public involvement statement** 12

13 Patients or the public were not involved in the design, or conduct, or reporting, or dissemination  
14  
15 plans of this research. The patients were involved in the study by completing the  
16  
17 questionnaires face-to-face.  
18  
19

### 20 21 **Statistical analysis** 22

23 IBM SPSS software version 21.0 and AMOS software version 21.0 were employed  
24  
25 for the statistical analyses. Descriptive statistics were used to summarize the breast  
26  
27 cancer patients' sociodemographic characteristics. Item analysis, validity and  
28  
29 reliability of the questionnaire were assessed. All analyses used two-tailed p values  
30  
31 and  $p < 0.05$  is considered statistically significant.  
32  
33  
34  
35

### 36 37 **Item analysis** 38

39 Item analysis means to test the quality of each item, whose purpose is to test the  
40  
41 suitability or reliability of instruments and individual items. The results can be used as  
42  
43 the basis for the screening or modification of individual items. In this study, the  
44  
45 critical value method and item-total score correlation method were used for item  
46  
47 analysis. The items with correlation coefficient less than 0.4 or not reaching the  
48  
49 significant level were deleted<sup>[22]</sup>.  
50  
51  
52  
53

### 54 55 **Reliability analysis** 56

57 Internal consistency refers to the homogeneity among items and internal correlation  
58  
59  
60

1  
2  
3 among tools, which are assessed using the Cronbach'  $\alpha$  coefficient. Cronbach's  $\alpha$   
4  
5  
6 coefficient served as a metric for assessing the reliability of the scale. Score greater  
7  
8 than or equal to 0.7 is considered acceptable<sup>[23]</sup>. More scores indicates more excellent  
9  
10 internal consistency.  
11  
12

13  
14 Test-retest reliability indicates the temporal stability of the questionnaire by  
15  
16 calculating the Pearson correlation coefficient of the total score and each factor' score.  
17  
18 Score ranged from 0.70 to 0.89 is considered strong, and score higher than 0.90 is  
19  
20 considered very strong.  
21  
22

### 23 24 **Validity analysis**

25  
26 The Content Validity Index is calculated based on the values obtained from expert  
27  
28 opinions. It includes item-level content validity index (I-CVI) and the scale-level  
29  
30 content validity index (S-CVI) . Six experts rated the correlation between each item  
31  
32 and its dimension of the Chinese family resilience questionnaire, 1 = not related, 2 =  
33  
34 weak correlation, 3 = more relevant, 4 = very relevant. I-CVI means that each item  
35  
36 appropriately reflect the extent of the concept to be measured, and S-CVI indicates  
37  
38 the mean value of I-CVI of all items. I-CVI  $\geq$  0.78 and S-CVI  $\geq$  0.90 are considered  
39  
40 acceptable<sup>[23]</sup>.  
41  
42  
43  
44  
45  
46

47  
48 The exploratory factor analysis and confirmatory factor analysis were used to  
49  
50 assess construct validity<sup>[24]</sup>. Kaise-Meyer-Olkin (KMO) test and Bartlett's  $\chi^2$  test were  
51  
52 used to examine the suitability for factor analysis. For the explanatory factor analysis,  
53  
54 a load of more than 0.4 of the item on a factor was used as a factor attribution  
55  
56 criterion. Load less than 0.4 or double load was used as the criteria for deleting the  
57  
58  
59  
60

item would be deleted<sup>[22]</sup>. Confirmatory factor analysis was used to examine the Questionnaire four-factor model. Chi-square degree of freedom ratio, Root Mean Square Residual, Goodness of fit index, Comparative fit index, Incremental fit index as well as Root Mean Square Error Approximate was used to evaluate the model<sup>[22]</sup>.

## Results

### Demographic and clinical characteristics

All the breast cancer patients were female. The patients' age of the first sampling was 20~78 (45.77±10.09) years old, and the second sampling was 22~73 (45.7±10.213) years old. The demographic and clinical characteristics of the sample were shown in Table 1.

**Table 1 Characteristics of the participants from two sampling**

| Category                            | First sampling<br>(n=249) | Second sampling<br>(n=310) |
|-------------------------------------|---------------------------|----------------------------|
| Marital status                      |                           |                            |
| Single                              | 10 (4)                    | 15 (4.8)                   |
| Married                             | 232 (93.2)                | 286 (92.3)                 |
| Education                           |                           |                            |
| Divorced or widowed                 | 7 (2.8)                   | 9 (2.9)                    |
| Bachelor or above                   | 31 (12.4)                 | 37 (11.9)                  |
| Diploma                             | 31 (12.4)                 | 36 (11.6)                  |
| High school, technical secondary    | 48 (19.3)                 | 59 (19.0)                  |
| Occupation                          |                           |                            |
| Middle school                       | 139 (55.8)                | 178 (57.4)                 |
| On job                              | 59 (23.7)                 | 70 (22.6)                  |
| Sick rest                           | 23 (9.2)                  | 28 (9.0)                   |
| Retirement                          | 34 (13.7)                 | 39 (12.6)                  |
| Unemployed or otherwise             | 133 (53.4)                | 173 (55.8)                 |
| Household per capita monthly income |                           |                            |
| Less than 2000 RMB                  | 93 (37.3)                 | 119 (38.4)                 |
| 2000-3999 RMB                       | 97 (39)                   | 118 (38.1)                 |
| More than 4000 RMB                  | 59 (23.7)                 | 70 (22.6)                  |
| Long-term residence                 |                           |                            |
| Country                             | 117 (47)                  | 150 (48.4)                 |
| Cities and towns                    | 132 (53)                  | 160 (51.6)                 |

|    |                                           |            |            |
|----|-------------------------------------------|------------|------------|
| 1  |                                           |            |            |
| 2  |                                           |            |            |
| 3  | Primary caregiver                         |            |            |
| 4  | Spouse                                    | 146 (58.6) | 181 (58.4) |
| 5  | Sons and daughters                        | 58 (23.3)  | 70 (22.6)  |
| 6  | Parents                                   | 21 (8.4)   | 26 (8.4)   |
| 7  | Oneself                                   | 15 (6)     | 20 (6.5)   |
| 8  | Other                                     | 9 (3.6)    | 13 (4.2)   |
| 9  |                                           |            |            |
| 10 | Living situation                          |            |            |
| 11 | Live by oneself                           | 7 (2.8)    | 8 (2.6)    |
| 12 | Spouse cohabitation                       | 190 (76.3) | 237 (76.5) |
| 13 | Two generations live together             | 19 (7.6)   | 22 (7.1)   |
| 14 | Big family                                | 29 (11.6)  | 38 (12.3)  |
| 15 | Other                                     | 4 (1.6)    | 5 (1.6)    |
| 16 |                                           |            |            |
| 17 | Medical expenses payment manner           |            |            |
| 18 | Medical insurance                         | 95 (38.2)  | 116 (37.4) |
| 19 | Rural cooperative medical care            | 140 (56.2) | 178 (57.4) |
| 20 | Self pay                                  | 14 (5.6)   | 16 (5.2)   |
| 21 |                                           |            |            |
| 22 | Treatment of disease                      |            |            |
| 23 | Surgery/ Chemotherapy                     | 214 (85.9) | 266 (85.8) |
| 24 | Surgery /Chemotherapy/ Radiotherapy       | 25 (10)    | 32 (10.3)  |
| 25 | Surgery/ Chemotherapy /Radiotherapy       | 3 (1.2)    | 3 (1.0)    |
| 26 |                                           |            |            |
| 27 | Endocrinotherapy                          |            |            |
| 28 | Surgery /Chemotherapy /Radiotherapy       | 3 (1.2)    | 4 (1.3)    |
| 29 |                                           |            |            |
| 30 | /Molecular targeting treatment            |            |            |
| 31 | Surgery/ Chemotherapy/ Radiotherapy/      | 1 (0.4)    | 1 (0.3)    |
| 32 |                                           |            |            |
| 33 | Endocrinotherapy /Molecular targeting     |            |            |
| 34 | treatment                                 |            |            |
| 35 | Surgery/Chemotherapy/Endocrinotherapy     | 1 (0.4)    | 1 (0.3)    |
| 36 | Surgery /Chemotherapy/Molecular targeting | 2 (0.8)    | 3 (1.0)    |
| 37 |                                           |            |            |
| 38 | treatment                                 |            |            |
| 39 | Surgery way                               |            |            |
| 40 | Breast conserving surgery                 | 68 (27.3)  | 91 (29.4)  |
| 41 | Modified radical operation                | 25 (10)    | 28 (9.0)   |
| 42 | Mastectomy                                | 156 (62.7) | 191 (61.6) |
| 43 |                                           |            |            |
| 44 | Complications                             |            |            |
| 45 | No                                        | 238 (95.6) | 298 (96.1) |
| 46 | Yes                                       | 11 (4.4)   | 12 (3.9)   |
| 47 |                                           |            |            |
| 48 | Family history of disease                 |            |            |
| 49 | No                                        | 245 (98.4) | 304 (98.1) |
| 50 | Yes                                       | 4 (1.6)    | 6 (1.9)    |
| 51 |                                           |            |            |
| 52 |                                           |            |            |
| 53 |                                           |            |            |

### Cross-cultural adaption

During the expert consultation process, a psychologist believed the Chinese expression of Item 3 'We can deal with illness as a family' was hard to understand. He



1  
2  
3 suggested changing it with a substitute word and adjusting the word order. Another  
4  
5  
6 experts believed that ‘social network’ in item 11 ‘We feel that the people in our social  
7  
8  
9 network would be happy to support us emotionally in dealing the illness’ was easily  
10  
11 confused with social platforms on the Internet in Chinese. They suggested changing  
12  
13 it to ‘social circle’. In addition, expert thought the Chinese expressions of Item 16  
14  
15  
16 ‘Our friends respect our family for how we reacted to the illness’ and Item 17 ‘We  
17  
18  
19 believe that we can manage the illness’ had ambiguities. Combined with the feedback  
20  
21  
22 of the subjects in the pretest, we did appropriate readjustment suitable for Chinese  
23  
24  
25 cultural background. During the pretesting, almost all patients thought the Chinese  
26  
27  
28 expressions of Item 1 ‘We understand each other with regard to the experience of  
29  
30  
31 illness we are living’ was inappropriate and hard to understand. To clarify the  
32  
33  
34 meaning of this item for the participants, after communicating with the original author,  
35  
36 we made amendments.

### 37 **Item analysis**

38  
39  
40 **correlation analysis.** The correlation analysis showed that the correlation coefficient  
41  
42  
43 between the score of each item and the total score of the questionnaire was  
44  
45  
46 0.437~0.712 ( $P<0.01$ ), both greater than 0.4. Thus, all items were reserved.

47  
48 **Extreme Value Method.** Critical value method was used as the test index to analyze  
49  
50  
51 the distinction between entries in the Chinese version of the family resilience  
52  
53  
54 questionnaire. It showed that the differences among all items were statistically  
55  
56  
57 significant ( $P<0.01$ ).

### 58 **Reliability**

1  
2  
3  
4 **Internal consistency.** The Cronbach's  $\alpha$  coefficients for the total Chinese version of  
5  
6 Family Resilience Questionnaire was 0.909. Cronbach's  $\alpha$  coefficients of four factors  
7  
8 were 0.902, 0.932, 0.905, 0.963 respectively.  
9

10  
11 **Test-retest reliability.** The test-retest reliability for the total Chinese version of  
12  
13 Family Resilience Questionnaire was 0.905, which respectively were 0.952, 0.949,  
14  
15 0.968, 0.942.  
16  
17

## 18 19 **Validity**

20  
21 **Content validity.** For the expert panel, the scale-level content validity index (S-CVI )  
22  
23 was 0.97, and the item-level content validity index (I-CVI) ranged from 0.83 to 1.00.  
24  
25

26  
27 **Construct validity.** For exploratory factor analysis, KMO value was 0.907,  
28  
29 indicating that the data were suitable for factor analysis, and Bartlett's test of  
30  
31 sphericity was 5006.376 ( $P < 0.001$ ), suggesting that extraction of common factors  
32  
33 could explain most of the statistical information which questionnaire entries  
34  
35 represented<sup>[22]</sup>. Four common factors with eigenvalue  $> 1$  were extracted by principal  
36  
37 component analysis, which could explain 72.146% of the total variance. Furthermore,  
38  
39 four common factors extracted are consistent with the four subscales of the original  
40  
41 English questionnaire. The load of each item on its dimension in the component  
42  
43 matrix was  $> 0.40$  (minimum value:0.476; maximum value:0.968) by maximum  
44  
45 variance orthogonal rotation. The final four common factors extracted in this study  
46  
47 were consistent with the original questionnaire. Factor 1 was named Communication  
48  
49 and cohesion, Factor 2 was named Perceived social support, Factor 3 was named  
50  
51 Perceived family coping and factor 4 was named Religiousness and Spirituality. See  
52  
53  
54  
55  
56  
57  
58  
59  
60

the component matrix of each factor in Table 2.

**Table 2 Factor loading matrix after rotation in the Chinese version of FaRE Questionnaire**

| Factor                         | Item                                                                                                              | principal component |             |             |             |
|--------------------------------|-------------------------------------------------------------------------------------------------------------------|---------------------|-------------|-------------|-------------|
|                                |                                                                                                                   | Factor 1            | Factor 2    | Factor3     | Factor 4    |
| Communication and cohesion     | B7 Everyone in the family is open to listening other's opinions regarding the illness                             | <b>.841</b>         | .173        | .183        | .046        |
|                                | B4 We discuss the illness-related problems until we find a shared solution                                        | <b>.834</b>         | .139        | .106        | .070        |
|                                | B6 We are honest when talking about the illness amongst ourselves                                                 | <b>.807</b>         | .178        | .136        | .038        |
|                                | B5 Everyone in the family feels free to express their own opinion regarding the illness                           | <b>.787</b>         | .132        | .118        | .096        |
|                                | B2 In our family we feel that we can talk about how to communicate between us                                     | <b>.775</b>         | .036        | .212        | .056        |
|                                | B3 We can deal this illness as a family                                                                           | <b>.732</b>         | .165        | .115        | .055        |
|                                | B8 The things we do for each other in dealing with this illness make us feel part of the family                   | <b>.688</b>         | .120        | .175        | .011        |
|                                | B1 We understand each other with regard to the experience of illness we are living                                | <b>.476</b>         | .245        | .116        | -.009       |
| Perceived social support       | B15 We receive gifts and favours from our closest friends                                                         | .076                | <b>.824</b> | .125        | .044        |
|                                | B12 We feels that our closest friends would be happy to support us emotionally in managing the illness            | .249                | <b>.804</b> | .185        | .077        |
|                                | B14 We know we are important for our friends                                                                      | .182                | <b>.801</b> | .254        | .040        |
|                                | B10 We can rely on our close friends to help us deal this illness                                                 | .035                | <b>.797</b> | .047        | -.001       |
|                                | B9 We ask our closest friends to help and assist us in this battle against the illness                            | .185                | <b>.790</b> | .120        | .110        |
|                                | B13 We know that if we need comfort, our closest friends will be there for us                                     | .189                | <b>.788</b> | .258        | .095        |
|                                | B11 We feel that the people in our social network would be happy to support us emotionally in dealing the illness | .173                | <b>.788</b> | .170        | .052        |
| Perceived social support       | B16 Our friends respect our family for how we reacted to the illness                                              | .241                | <b>.780</b> | .222        | .076        |
|                                | B17 We believe that we can manage the illness                                                                     | .259                | .266        | <b>.818</b> | -.004       |
|                                | B18 We can solve important problems in our life such as this illness                                              | .216                | .313        | <b>.815</b> | .032        |
|                                | B19 We feel we are strong enough to cope with this illness                                                        | .300                | .204        | <b>.804</b> | .044        |
|                                | B20 We have the strength to solve our problem                                                                     | .231                | .271        | <b>.780</b> | .084        |
| Religiousness and Spirituality | B24 We ask our religious/spiritual reference figure for advice or words of comfort about the illness              | .059                | .055        | .019        | <b>.968</b> |
|                                | B21 We attend the church / synagogue / mosque/other places of worship                                             | .074                | .101        | .034        | <b>.938</b> |
|                                | B23 We participate in the activities of our religious                                                             | .041                | .060        | .032        | <b>.935</b> |

|                                                                                       |        |        |        |             |
|---------------------------------------------------------------------------------------|--------|--------|--------|-------------|
| community                                                                             |        |        |        |             |
| B22 We believe there is a supreme spiritual being that will help us deal this illness | .081   | .098   | .053   | <b>.933</b> |
| Eigenvalues                                                                           | 3.423  | 9.149  | 1.638  | 3.105       |
| Cumulative variance tribute rate (%)                                                  | 38.120 | 52.383 | 65.320 | 72.146      |

To further verify the structural validity of the questionnaire, 310 samples were subjected to confirmatory factor analysis using AMOS 21.0 software. According to the structure and dimension of the original questionnaire, Communication and cohesion, Perceived social support, Perceived family coping and Religiousness and Spirituality were set as four latent variables. And the factor structure including 24 items was set as observation variable to establish a preset model of confirmatory factor analysis. Normality test for the collected data showed that each item's skewness index was far < 3, kurtosis index of was far < 8. The data were normally distributed. Therefore, the maximum likelihood method was adopted to estimate the parameter model. The initial model fitting results were shown in Figure 1.

The fitting indexes of the initial model were not ideal, which indicated the deviation between the default model and the actual observation data. It needed to be revised. The model was revised on the basis of the original hypothesis model. The modification index of the model was defined as 4. If the modification index was greater than 4, it meant that the model needed to be modified. Fitting indexes both were greater than 0.9 after the modification of the default model, which reached an acceptable range (Figure2). See Table 3 for the fitting indexes before and after the modification.

**Table 3 Fitting indexes before and after the model modification**

| Indexes | $\chi^2/df$ | RMR | GFI | CFI | IFI | NFI | RMSEA |
|---------|-------------|-----|-----|-----|-----|-----|-------|
|---------|-------------|-----|-----|-----|-----|-----|-------|

|                     |       |       |       |       |       |       |                                             |
|---------------------|-------|-------|-------|-------|-------|-------|---------------------------------------------|
| before modification | 2.478 | 0.09  | 0.851 | 0.938 | 0.938 | 0.900 | 0.069                                       |
| after modification  | 1.697 | 0.039 | 0.912 | 0.972 | 0.972 | 0.934 | 0.048                                       |
| reference standards | 1~3   | <0.05 | >0.90 | >0.90 | >0.90 | >0.90 | <0.05 very good<br><0.08 good<br><0.10 fair |

## Discussion

The FaRE Questionnaire is an instrument designed to measure family resilience among patients with cancer<sup>[19]</sup>. The study was conducted to determine whether the FaRE Questionnaire could be used among Chinese patients with breast cancer in mainland China. Through literature review, the Chinese research status of family resilience was not profound enough, especially for patients with breast cancer. Accurate assessment of family resilience in breast cancer patients is fundamental. A recent review showed that instruments for family resilience in patients with breast cancer lacked localization<sup>[25]</sup>. Thus we translated the FaRE Questionnaire into Chinese through forward and reverse translation, expert review, cultural adaption and pilot testing to ensure the semantic equivalence and intelligibility of the Chinese version of the questionnaire. We also examined the reliability and validity of the Chinese version of the FaRE Questionnaire using item analysis, reliability, content validity, exploratory factor analysis, and confirmatory factor analysis.

Previously, the original Italian version of the questionnaire was proved to be reliable and valid among a total of 213 patients with histologically confirmed non-metastatic breast or prostate cancer. Nevertheless, patients' lifestyles and cultural backgrounds in China are different from Italy. Our study suggested that the FaRE

1  
2  
3  
4  
5  
6  
7  
8  
9  
10  
11  
12  
13  
14  
15  
16  
17  
18  
19  
20  
21  
22  
23  
24  
25  
26  
27  
28  
29  
30  
31  
32  
33  
34  
35  
36  
37  
38  
39  
40  
41  
42  
43  
44  
45  
46  
47  
48  
49  
50  
51  
52  
53  
54  
55  
56  
57  
58  
59  
60

Questionnaire can be adapted to Chinese culture, which had excellent content validity and construct validity as well as high internal consistency reliability and test-retest reliability among patients with breast cancer.

Item analysis showed that correlation coefficients between the score of each item and the total score of the questionnaire were both greater than 0.4, and the CR value also was statistically significant, indicating suitability or reliability of items.

Cronbach's  $\alpha$  coefficient for the total FaRE Questionnaire was 0.909, and Cronbach's  $\alpha$  coefficients of four factors were respectively 0.90, 0.932, 0.905, 0.963, indicating high internal consistency reliability of the Chinese version of FaRE Questionnaire. This finding was higher than Cronbach's  $\alpha$  for the Italian population<sup>[18]</sup>. The Chinese version of the FaRE Questionnaire also had a high test-retest reliability, indicating good time stability in breast cancer patients.

Results of our study shown that the FaRE Questionnaire had a good content validity, indicating that the questionnaire can accurately reflect the family resilience of patients with breast cancer. Exploratory factor analysis and confirmatory factor analysis were conducted on the large-scale samples to examine the construct validity. For exploratory factor analysis, the analyses results indicated that all the items had factor loading  $>0.476$ , meeting the criterion for significance. For confirmatory factor analysis, the results indicated a four-factor structure consistent with the original Italy version. These indicated that the validity of the Chinese version of the FaRE Questionnaire was relatively stable and was consistent with the tabulation theory.

As a global public health problem threatening women' health, breast cancer had

1  
2  
3 more significant impacts on patients, their spouses, family members, conjugal  
4  
5  
6 relationships and family function. Family resilience emphasizes how the family as a  
7  
8  
9 system can cope with stress and adversity to help the family achieve good adjustment  
10  
11 and adaptation. It is imperative to pay attention to the family resilience of breast  
12  
13 cancer patients. The Chinese version of the FaRE questionnaire finally formed in this  
14  
15  
16 study has been subjected to strict reliability and validity test. The preliminary results  
17  
18  
19 also show that the questionnaire can scientifically and effectively evaluate the family  
20  
21  
22 resilience of breast cancer patients in mainland China. The Chinese version of FaRE  
23  
24  
25 questionnaire has satisfactory validity and reliability for use among patients with  
26  
27  
28 breast cancer in mainland China. Further research can use the instrument to assess the  
29  
30  
31 family resilience of breast cancer patients, and on this basis provide personalized and  
32  
33  
34 scientific family resilience intervention. However, there are some limitations in the  
35  
36  
37 study. Data should have been collected from family members as well, given the  
38  
39  
40 questionnaire is not just aimed at patients. Content validity scores should have been  
41  
42  
43 gathered for patients and family members as part of the expert panel. In addition, it  
44  
45  
46 would have been beneficial to provide some evidence of construct validity, and future  
47  
48  
49 studies are suggested to evaluate the convergent validity and sensitivity of 4 factors.

## 50 **Conclusions**

51  
52 The results of this study indicate that the Chinese version of FaRE Questionnaire is a  
53  
54  
55 valid and reliable instrument. It can effectively assess the family resilience and  
56  
57  
58 provide a tool for future research.

## 59 **Author affiliations**

1  
2  
3  
4  
5  
6  
7  
8  
9  
10  
11  
12  
13  
14  
15  
16  
17  
18  
19  
20  
21  
22  
23  
24  
25  
26  
27  
28  
29  
30  
31  
32  
33  
34  
35  
36  
37  
38  
39  
40  
41  
42  
43  
44  
45  
46  
47  
48  
49  
50  
51  
52  
53  
54  
55  
56  
57  
58  
59  
60

<sup>1</sup>School of Nursing and Health, Zhengzhou University, Zhengzhou ,China

<sup>2</sup>Zhengzhou Central Hospital Affiliated To Zhengzhou University, Zhengzhou, China

<sup>3</sup> College of Psychological Education (Based school), Zhengzhou University, Zhengzhou, China

<sup>4</sup> Experimental Center for Basic Medicine, Zhengzhou University, Zhengzhou, China.

<sup>5</sup>Department of Pharmacology, Medical School of Huanghe Science and Technology University, Zhengzhou, China

### **Contributors**

MML, RM and SFZ contributed to the conception, design and manuscript writing of the study, revising the draft critically for important intellectual content. SSW, JWJ and LML contributed to the questionnaire translation, data acquisition and interpretation of the outcomes. PPW and ZXZ contributed to study supervision, project administration and funding acquisition. PW contributed to the crucial revision of the manuscript for important intellectual content, provided final confirmation of the revised version to be published. XYL contributed to improve the quality of English throughout the manuscript.

### **Funding**

This work was supported by the Innovative Talent Project of Colleges and Universities in Henan Province grant number 20HASTIT047, Foundation of Co-constructing Project of Henan Province and National Health Commission grant number SBGJ202002103, Project of Department of Science and Technology of Henan Province grant number 202102310069, the Medical Education Research Project of Henan Health Commission grant number Wjlx2020362, the Project of Social Science Association in Henan Province grant number SKL-2021-472, the Project of Social Science Association in Henan Province grant number SKL-2021-476 and Philosophy and social



1  
2  
3 science planning project of Henan grant number 2021BSH017.  
4  
5

6 **Competing interests** None declared.  
7

8 **Patient consent for publication** Parental/guardian consent obtained.  
9

10  
11 **Ethics approval**  
12

13  
14 The Ethics Committee of Zhengzhou University has approved the study(ZZURIB 2020-19).  
15

16 **Provenance and peer review** Not commissioned; externally peer reviewed.  
17

18  
19 **Data availability statement** No additional data available  
20

21 Contact:17839945811@163.com.  
22

23  
24 **Open access** This is an open access article distributed in accordance with the Creative Commons  
25  
26 Attribution Non Commercial (CC BY-NC 4.0) license, which permits others to distribute, remix,  
27  
28 adapt, build upon this work non-commercially, and license their derivative works on different  
29  
30 terms, provided the original work is properly cited, appropriate credit is given, any changes made  
31  
32 indicated, and the use is non-commercial. See: <http://creativecommons.org/licenses/by-nc/4.0/>.  
33  
34  
35

36  
37 **Declaration of conflicting interests**  
38

39  
40 We have read and understood BMJ policy on declaration of interests and declare that we have no  
41  
42 competing interests.  
43  
44

45 **REFERENCES**  
46

- 47 [dataset][1]Bray F, Ferlay J, Soerjomataram I, et al .Data from: Global cancer statistics 2018:  
48  
49 GLOBOCAN estimates of incidence and mortality worldwide for 36 cancers in 185 countries.  
50  
51 CA: a cancer journal for clinicians 2018; 68:394-24. doi:10.3322/caac.21492  
52  
53  
54  
55 2 Cardoso F, Kyriakides S, Ohno S, et al. Early breast cancer: ESMO Clinical Practice Guidelines  
56  
57 for diagnosis, treatment and follow-up. Annals of Oncology 2018; 30:1194-20.  
58  
59  
60

- 1  
2  
3 doi:10.1093/annonc/mdz173  
4  
5  
6 3 Alexander A, Kaluve R, Prabhu JS, et al. The Impact of Breast Cancer on the Patient and the  
7  
8 Family in Indian Perspective. *Indian Journal of Palliative Care* 2019; 25:66 – 2.  
9  
10 doi:10.4103 /IJPC.IJPC\_158\_18  
11  
12  
13 4 Haefner, J. An application of Bowen family systems theory. *Issues in Mental Health Nursing*  
14  
15 2014;35:835-41. doi:10.3109/01612840.2014.921257  
16  
17  
18 5 Rolland JS. Cancer and the family: An integrative model. *Cancer* 2005;104:2584-95. doi:10.  
19  
20 1002/cncr.21489  
21  
22  
23 6 Matzka M, Mayer H, Köck-Hódi S, et al. Relationship between Resilience, Psychological  
24  
25 Distress and Physical Activity in Cancer Patients: A Cross - Sectional Observation Study.  
26  
27 *PloS One* 2016;11:e0154496. doi:10.1371/journal.pone.0154496  
28  
29  
30 7 Milanti A, Metsala Eija, Hannula L. Reducing psychological distress in patients undergoing  
31  
32 chemotherapy. *British Journal of Nursing* (Mark Allen Publishing) 2016; 25:S25-30.  
33  
34  
35 doi:10.12968/bjon.2016.25.4.S25  
36  
37  
38 8 Tsang W, Chow LWC, Loo WTY, et al. Tai Chi Chuan enhances cytokine expression levels and  
39  
40 psychological factors in post-chemotherapy breast cancer patients. *European Journal of*  
41  
42 *Cancer & Clinical Onology* 2015;51:e30.  
43  
44  
45 9 An Y, Fu G, Yuan, G. Quality of Life in Patients With Breast Cancer: The Influence of Family  
46  
47 Caregiver's Burden and the Mediation of Patient's Anxiety and Depression. *The Journal of*  
48  
49 *Nervous and Mental Disease* 2019;207:921 – 26. doi:10.1097/NMD.0000000000001040  
50  
51  
52 10 Fang CY, Manne, SL, Pape SJ. Functional impairment, marital quality, and patient  
53  
54  
55  
56  
57  
58  
59  
60  
psychological distress as predictors of psychological distress among cancer patients '

- 1  
2  
3 spouses. *Health Psychology* 2001;20:452-57.  
4  
5  
6 11 Stenberg U, Ruland CM, Miaskowski C. Review of the literature on the effects of caring for a  
7  
8 patient with cancer. *Psycho-Oncology* 2010;19:1013 – 25. doi:10.1002/pon.1670  
9  
10  
11 12 Agbeko AE, Arthur J, Bayuo J, et al. Seeking healthcare at their ‘right’ time; the iterative  
12  
13 decision process for women with breast cancer. *BMC Cancer* 2020;20:1011.doi: 10.1186/s  
14  
15 12885-020-07520-x  
16  
17  
18 13 Zhang L, Yu R, Zheng QH, et al. Study on relationship model between stigma, family function  
19  
20 of breast cancer patients. *Nursing Research* 2017;31:1333-36.  
21  
22  
23 14 Chen CM, Yang YU, Wang YJ, et al. Features and Effects of Family Function in Postoperative  
24  
25 Breast Cancer Patients under Chemotherapy in a Hospital, Zhejiang. *Medicine and Society*  
26  
27 2014; 27:81-3.  
28  
29  
30 15 Ginter AC, Radina ME. “I Was There With Her” : Experiences of Mothers of Women With  
31  
32 Breast Cancer. *Journal of Family Nursing* 2019;25:54 – 80. doi:10.1177/1074840718816745  
33  
34  
35 16 Wang WH, Jiang Z, Yang Z. Family Resilience: Concept and Application in Families with a  
36  
37 Cancer Patient(review). *Chinese Journal of Rehabilitation Theory and Practice* 2015;21:  
38  
39 534-38.  
40  
41  
42 17 Inhestern L, Bergelt C. When a mother has cancer: strains and resources of affected families  
43  
44 from the mother’ s and father’ s perspective-a qualitative study. *BMC Women’ s Health*  
45  
46 2018;18:72. doi:10.1186/s12905-018-0562-8  
47  
48  
49 18 Nie ZH, LIU JE, Su YL, et al. A randomized controlled study of spousal communication  
50  
51 intervention in breast cancer patients. *Chinese Nursing Management* 2019;19:682-87.  
52  
53  
54 [dataset][19]Faccio F, Gandini S, Renzi C, et al. Data from:Development and validation of the  
55  
56  
57  
58  
59  
60

1  
2  
3 Family Resilience (FaRE) Questionnaire: an observational study in Italy. *BMJ Open*  
4  
5  
6 2019;9:e024670. doi:10.1136/bmjopen-2018-024670  
7

8  
9 [dataset][20]Boomsma A. Data from:The robustness of LISREL against small sample sizes in  
10  
11 factor analysis models[J]. *Systems under indirect observation: Causality, structure,*  
12  
13  
14 prediction, 1982, 1: 149-173.  
15

16  
17 21 Brislin RW. Back-translation for cross-cultural research. *Journal of Cross-Cultural Psychology*  
18  
19 1970;1:185-16.  
20

21  
22 [dataset][22]Wu ML. Data from:Questionnaire statistical analysis practice. Operation and  
23  
24 Application of SPSS. Chongqing: Chongqing University Press, 2010.  
25

26  
27 [dataset][23]Polit DF, Beck CT. Data from:The content validity index: are you sure you know  
28  
29 what ' s being reported? Critique and recommendations. *Research in Nursing & Health*  
30  
31 2006;29:489 - 97. doi: 10.1002/nur.20147  
32  
33

34  
35 24 Martin JS, Vincenzi C, Spirig R. Principles and methods of good practice for the translation  
36  
37 process for instruments of nursing research and nursing practice. *Pflege* 2007;20:157-63.doi:  
38  
39 10.1024/1012-5302.20.3.157  
40  
41

42  
43 25 Wang ZX, Liu JE, Chen SQ. The research progress of family adjustment and adaptation for  
44  
45 breast cancer patients. *Chinese Nursing Management* 2016;16:195-98.  
46  
47  
48  
49  
50  
51  
52  
53  
54

### 55 **General Information Questionnaire.**

56  
57 Marital status  
58 Single  
59 Married  
60

1  
2  
3 Education  
4 Divorced or widowed  
5 Bachelor or above  
6 Diploma  
7 High school, technical secondary  
8  
9 Occupation  
10 Middle school  
11 On job  
12 Sick rest  
13 Retirement  
14 Unemployed or otherwise  
15  
16 Household per capita monthly income  
17 Less than 2000 RMB  
18 2000-3999 RMB  
19 More than 4000 RMB  
20  
21 Long-term residence  
22 Country  
23 Cities and towns  
24  
25 Primary caregiver  
26 Spouse  
27 Sons and daughters  
28 Parents  
29 Oneself  
30 Other  
31  
32 Living situation  
33 Live by oneself  
34 Spouse cohabitation  
35 Two generations live together  
36 Big family  
37 Other  
38  
39 Medical expenses payment manner  
40 Medical insurance  
41 Rural cooperative medical care  
42 Self pay  
43  
44 Treatment of disease  
45 Surgery  
46 Chemotherapy  
47 Endocrinotherapy  
48 Molecular targeting treatment  
49 Radiotherapy  
50  
51 Surgery way  
52 Breast conserving surgery  
53 Modified radical operation  
54 Mastectomy  
55  
56 Complications  
57  
58  
59  
60

1  
2  
3 No  
4 Yes  
5 Family history of disease  
6  
7 No  
8 Yes  
9  
10  
11  
12

## 13 **Figure legends**

14  
15 **Figure 1 Fitting figure of default model of Chinese version of FaRE Questionnaire**  
16

17  
18  
19  
20 **Figure 2 Fitting figure of modification model of the Chinese version of FaRE Questionnaire**  
21  
22  
23  
24  
25  
26  
27  
28  
29  
30  
31  
32  
33  
34  
35  
36  
37  
38  
39  
40  
41  
42  
43  
44  
45  
46  
47  
48  
49  
50  
51  
52  
53  
54  
55  
56  
57  
58  
59  
60

1  
2  
3  
4  
5  
6  
7  
8  
9  
10  
11  
12  
13  
14  
15  
16  
17  
18  
19  
20  
21  
22  
23  
24  
25  
26  
27  
28  
29  
30  
31  
32  
33  
34  
35  
36  
37  
38  
39  
40  
41  
42  
43  
44  
45  
46  
47  
48  
49  
50  
51  
52  
53  
54  
55  
56  
57  
58  
59  
60

For peer review only

1  
2  
3  
4  
5  
6  
7  
8  
9  
10  
11  
12  
13  
14  
15  
16  
17  
18  
19  
20  
21  
22  
23  
24  
25  
26  
27  
28  
29  
30  
31  
32  
33  
34  
35  
36  
37  
38  
39  
40  
41  
42  
43  
44  
45  
46  
47  
48  
49  
50  
51  
52  
53  
54  
55  
56  
57  
58  
59  
60





1  
2  
3  
4  
5  
6  
7  
8  
9  
10  
11  
12  
13  
14  
15  
16  
17  
18  
19  
20  
21  
22  
23  
24  
25  
26  
27  
28  
29  
30  
31  
32  
33  
34  
35  
36  
37  
38  
39  
40  
41  
42  
43  
44  
45  
46  
47  
48  
49  
50  
51  
52  
53  
54  
55  
56  
57  
58  
59  
60

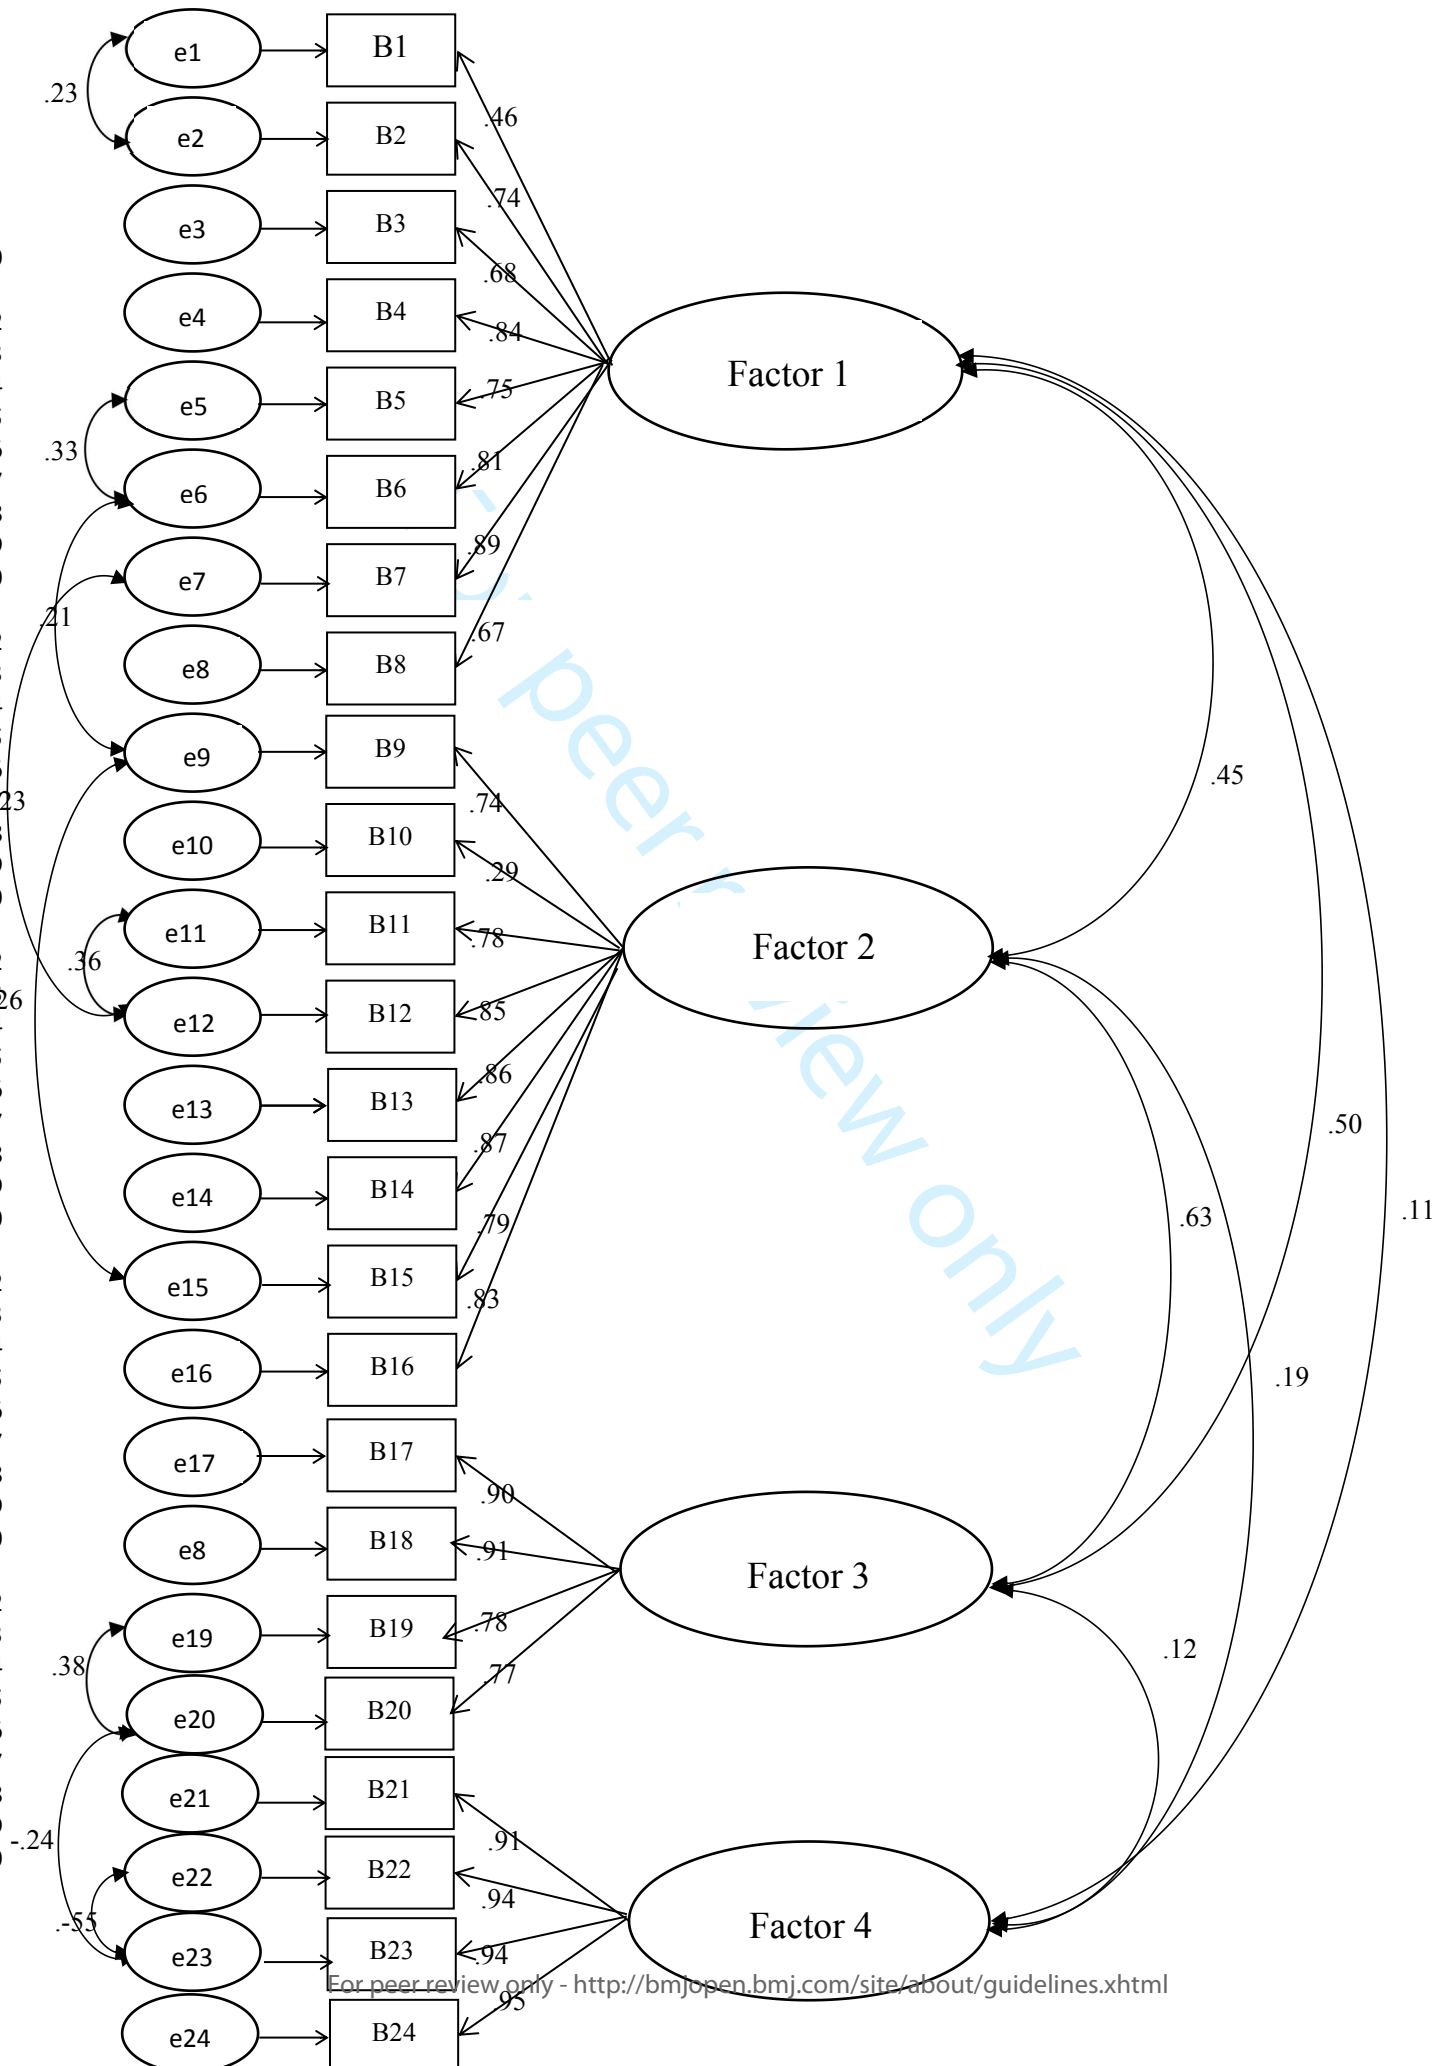

## STROBE Statement—checklist of items that should be included in reports of observational studies

|                              | Item No | Recommendation                                                                                                                                                                                                                                                                                                                                                                                                                                                                                                                                                                                                                                                                                                                                                    |
|------------------------------|---------|-------------------------------------------------------------------------------------------------------------------------------------------------------------------------------------------------------------------------------------------------------------------------------------------------------------------------------------------------------------------------------------------------------------------------------------------------------------------------------------------------------------------------------------------------------------------------------------------------------------------------------------------------------------------------------------------------------------------------------------------------------------------|
| <b>Title and abstract</b>    | 1       | (a) Indicate the study's design with a commonly used term in the title or the abstract<br><i>yes</i> ✓ <i>page 2 in clean copy</i><br>(b) Provide in the abstract an informative and balanced summary of what was done and what was found <i>yes</i> ✓ <i>page 2-3 in clean copy</i>                                                                                                                                                                                                                                                                                                                                                                                                                                                                              |
| <b>Introduction</b>          |         |                                                                                                                                                                                                                                                                                                                                                                                                                                                                                                                                                                                                                                                                                                                                                                   |
| Background/rationale         | 2       | Explain the scientific background and rationale for the investigation being reported<br><i>yes</i> ✓ <i>page 3-5 in clean copy</i>                                                                                                                                                                                                                                                                                                                                                                                                                                                                                                                                                                                                                                |
| Objectives                   | 3       | State specific objectives, including any prespecified hypotheses <i>yes</i> ✓ <i>page 5 in clean copy</i>                                                                                                                                                                                                                                                                                                                                                                                                                                                                                                                                                                                                                                                         |
| <b>Methods</b>               |         |                                                                                                                                                                                                                                                                                                                                                                                                                                                                                                                                                                                                                                                                                                                                                                   |
| Study design                 | 4       | Present key elements of study design early in the paper <i>yes</i> ✓ <i>page 5 in clean copy</i>                                                                                                                                                                                                                                                                                                                                                                                                                                                                                                                                                                                                                                                                  |
| Setting                      | 5       | Describe the setting, locations, and relevant dates, including periods of recruitment, exposure, follow-up, and data collection <i>yes</i> ✓ <i>page 5-6 in clean copy, page 9 (data collection) in clean copy</i>                                                                                                                                                                                                                                                                                                                                                                                                                                                                                                                                                |
| Participants                 | 6       | (a) <i>Cohort study</i> —Give the eligibility criteria, and the sources and methods of selection of participants. Describe methods of follow-up<br><i>Case-control study</i> —Give the eligibility criteria, and the sources and methods of case ascertainment and control selection. Give the rationale for the choice of cases and controls<br><i>Cross-sectional study</i> —Give the eligibility criteria, and the sources and methods of selection of participants <i>yes</i> ✓ <i>page 6 in clean copy</i><br>(b) <i>Cohort study</i> —For matched studies, give matching criteria and number of exposed and unexposed<br><i>Case-control study</i> —For matched studies, give matching criteria and the number of controls per case <i>Not Applicable</i> ✓ |
| Variables                    | 7       | Clearly define all outcomes, exposures, predictors, potential confounders, and effect modifiers. Give diagnostic criteria, if applicable <i>yes</i> ✓ <i>page 9-11 in clean copy</i>                                                                                                                                                                                                                                                                                                                                                                                                                                                                                                                                                                              |
| Data sources/<br>measurement | 8*      | For each variable of interest, give sources of data and details of methods of assessment (measurement). Describe comparability of assessment methods if there is more than one group <i>yes</i> ✓ <i>page 6-7 in clean copy</i>                                                                                                                                                                                                                                                                                                                                                                                                                                                                                                                                   |
| Bias                         | 9       | Describe any efforts to address potential sources of bias <i>Not Applicable</i> ✓                                                                                                                                                                                                                                                                                                                                                                                                                                                                                                                                                                                                                                                                                 |
| Study size                   | 10      | Explain how the study size was arrived at <i>yes</i> ✓ <i>page 6 in clean copy</i>                                                                                                                                                                                                                                                                                                                                                                                                                                                                                                                                                                                                                                                                                |
| Quantitative variables       | 11      | Explain how quantitative variables were handled in the analyses. If applicable, describe which groupings were chosen and why <i>Not Applicable</i> ✓                                                                                                                                                                                                                                                                                                                                                                                                                                                                                                                                                                                                              |
| Statistical methods          | 12      | (a) Describe all statistical methods, including those used to control for confounding <i>yes</i> ✓ <i>page 9-11 in clean copy</i><br>(b) Describe any methods used to examine subgroups and interactions <i>Not Applicable</i> ✓<br>(c) Explain how missing data were addressed <i>Not Applicable</i> ✓<br>(d) <i>Cohort study</i> —If applicable, explain how loss to follow-up was addressed<br><i>Case-control study</i> —If applicable, explain how matching of cases and controls was addressed<br><i>Cross-sectional study</i> —If applicable, describe analytical methods taking account of sampling strategy <i>yes</i> ✓ <i>page 6 in clean copy</i><br>(e) Describe any sensitivity analyses <i>Not Applicable</i> ✓                                    |

Continued on next page

1  
2  
3  
4  
5  
6  
7  
8  
9  
10  
11  
12  
13  
14  
15  
16  
17  
18  
19  
20  
21  
22  
23  
24  
25  
26  
27  
28  
29  
30  
31  
32  
33  
34  
35  
36  
37  
38  
39  
40  
41  
42  
43  
44  
45  
46  
47  
48  
49  
50  
51  
52  
53  
54  
55  
56  
57  
58  
59  
60

| <b>Results</b>           |     |                                                                                                                                                                                                                                                                                                                                                                                                                                                                                                            |
|--------------------------|-----|------------------------------------------------------------------------------------------------------------------------------------------------------------------------------------------------------------------------------------------------------------------------------------------------------------------------------------------------------------------------------------------------------------------------------------------------------------------------------------------------------------|
| Participants             | 13* | (a) Report numbers of individuals at each stage of study—eg numbers potentially eligible, examined for eligibility, confirmed eligible, included in the study, completing follow-up, and analysed <b>yes</b> ✓ <b>page 6 in clean copy</b><br>(b) Give reasons for non-participation at each stage <b>Not Applicable</b> ✓<br>(c) Consider use of a flow diagram <b>Not Applicable</b> ✓                                                                                                                   |
| Descriptive data         | 14* | (a) Give characteristics of study participants (eg demographic, clinical, social) and information on exposures and potential confounders <b>yes</b> ✓ <b>page 11-13 in clean copy</b><br>(b) Indicate number of participants with missing data for each variable of interest <b>Not Applicable</b> ✓<br>(c) <i>Cohort study</i> —Summarise follow-up time (eg, average and total amount) <b>Not Applicable</b> ✓                                                                                           |
| Outcome data             | 15* | <i>Cohort study</i> —Report numbers of outcome events or summary measures over time <b>Not Applicable</b> ✓<br><i>Case-control study</i> —Report numbers in each exposure category, or summary measures of exposure <b>Not Applicable</b> ✓<br><i>Cross-sectional study</i> —Report numbers of outcome events or summary measures <b>yes</b> ✓ <b>page 11-17 in clean copy</b>                                                                                                                             |
| Main results             | 16  | (a) Give unadjusted estimates and, if applicable, confounder-adjusted estimates and their precision (eg, 95% confidence interval). Make clear which confounders were adjusted for and why they were included <b>yes</b> ✓ <b>page 11-16 in clean copy</b><br>(b) Report category boundaries when continuous variables were categorized <b>Not Applicable</b> ✓<br>(c) If relevant, consider translating estimates of relative risk into absolute risk for a meaningful time period <b>Not Applicable</b> ✓ |
| Other analyses           | 17  | Report other analyses done—eg analyses of subgroups and interactions, and sensitivity analyses <b>Not Applicable</b> ✓                                                                                                                                                                                                                                                                                                                                                                                     |
| <b>Discussion</b>        |     |                                                                                                                                                                                                                                                                                                                                                                                                                                                                                                            |
| Key results              | 18  | Summarise key results with reference to study objective <b>yes</b> ✓ <b>page 17-20 in clean copy</b>                                                                                                                                                                                                                                                                                                                                                                                                       |
| Limitations              | 19  | Discuss limitations of the study, taking into account sources of potential bias or imprecision. Discuss both direction and magnitude of any potential bias <b>yes</b> ✓ <b>page 19 in clean copy</b>                                                                                                                                                                                                                                                                                                       |
| Interpretation           | 20  | Give a cautious overall interpretation of results considering objectives, limitations, multiplicity of analyses, results from similar studies, and other relevant evidence <b>yes</b> ✓ <b>page 19 in clean copy</b>                                                                                                                                                                                                                                                                                       |
| Generalisability         | 21  | Discuss the generalisability (external validity) of the study results <b>yes</b> ✓ <b>page 19 in clean copy</b>                                                                                                                                                                                                                                                                                                                                                                                            |
| <b>Other information</b> |     |                                                                                                                                                                                                                                                                                                                                                                                                                                                                                                            |
| Funding                  | 22  | Give the source of funding and the role of the funders for the present study and, if applicable, for the original study on which the present article is based <b>yes</b> ✓ <b>page 20-21 in clean copy</b>                                                                                                                                                                                                                                                                                                 |

\*Give information separately for cases and controls in case-control studies and, if applicable, for exposed and unexposed groups in cohort and cross-sectional studies.

**Note:** An Explanation and Elaboration article discusses each checklist item and gives methodological background and published examples of transparent reporting. The STROBE checklist is best used in conjunction with this article (freely available on the Web sites of PLoS Medicine at <http://www.plosmedicine.org/>, Annals of Internal Medicine at <http://www.annals.org/>, and Epidemiology at <http://www.epidem.com/>). Information on the STROBE Initiative is available at [www.strobe-statement.org](http://www.strobe-statement.org).
